# Supplementary material for: Stereodivergent synthesis of chiral spiropyrazolones through Pd-catalyzed asymmetric sequential hydroalkylation of 1,3-enynes: unusual solvent effects on the enantioselectivity
Source: Royal Society of Chemistry journal article supplement (doi:10.1039/d4qo00358f), 2024-01-01

## Supporting Information

### **Stereodivergent Synthesis of Chiral Spiropyrazolones through Pd-Catalyzed Asymmetric Sequential Hydroalkylation of 1,3-Enynes: Unusual Solvent Effect on the Enantioselectivity**

Shan Wang<sup>a</sup>, Long Li<sup>\*.a</sup>, Yifei Zheng<sup>a</sup>, Luqing Li<sup>a</sup>, Yingcheng Wang<sup>a</sup>, Fangzhi Peng<sup>a</sup>,  
Zhihui Shao<sup>\*.a,b</sup>

<sup>a</sup>Laboratory of Medicinal Chemistry for Natural Resource, Ministry of Education, School of Chemical Science and Technology, Yunnan Provincial Center for Research & Development of Natural Products, and State Key Laboratory for Conservation and Utilization of Bio-Resources in Yunnan, Yunnan University, Kunming 650500, China

<sup>b</sup>Southwest United Graduate School, Kunming 650092, China

E-mail: zhihui\_shao@hotmail.com; lilong@ynu.edu.cn

## Table of Contents

|                                                                                     |     |
|-------------------------------------------------------------------------------------|-----|
| 1. General Information .....                                                        | S1  |
| 2. General Procedures for the Synthesis of Substrates .....                         | S1  |
| 3. Optimization for Asymmetric Sequential Hydroalkylation with 1,3-Enynes.....      | S3  |
| 4. General Procedure for Asymmetric Sequential Hydroalkylation with 1,3-Enynes..... | S7  |
| 5. Application in Asymmetric Catalysis.....                                         | S76 |
| 6. The Assignment of Structure and Configuration.....                               | S85 |
| 7. Reference.....                                                                   | S89 |
| 8. Copies of NMR .....                                                              | S90 |

## 1. General Information

Unless otherwise noted, all reactions in standard conditions were carried out under an argon atmosphere. Solvents were dried by standard methods under argon atmosphere.  $^1\text{H}$  NMR,  $^{13}\text{C}$  NMR,  $^{19}\text{F}$  NMR and  $^{31}\text{P}$  NMR spectra were recorded on 400 MHz, 600 MHz instruments using  $\text{CDCl}_3$  as solvent. Chemical shifts of  $^1\text{H}$  NMR were recorded in parts per million (ppm,  $\delta$ ) relative to tetramethylsilane ( $\delta = 0.00$  ppm) with the solvent resonance as an internal standard ( $\text{CDCl}_3$ :  $\delta = 7.26$  ppm). NMR multiplicities are abbreviated as follows: s = singlet, d = doublet, t = triplet, sept = septet, m = multiplet, br = broad signal. High-resolution mass spectral analysis (HRMS) data were measured on a spectrometer by means of the ESI technique. The enantiomeric excess was determined by chiral HPLC with *n*-hexane and *i*-propanol as eluents. Optical rotations were measured on a polarimeter. Column chromatography was performed on silica gel (200–300 mesh).

## 2. General Procedures for the Synthesis of Substrates

### Synthesis of the 1,3-enynes **1**<sup>1</sup>

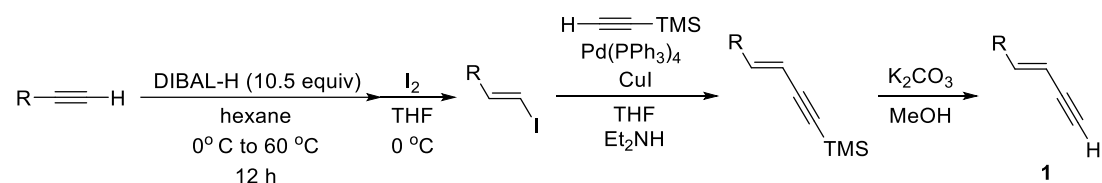

Terminal alkyne (40 mmol) was stirred in hexane (40 mL) at room temperature in 200 mL two-necked flask Under an Ar atmosphere. To the solution was added diisobutylaluminum hydride (DIBAL-H, 1.0 M in hexane, 42 mmol, 42 mL) at  $0\text{ }^\circ\text{C}$ . The mixture was stirred at  $0\text{ }^\circ\text{C}$  to room temperature for 2 h and then at  $60\text{ }^\circ\text{C}$  for 10 h. The mixture was checked with TLC (*n*-hexane). Then to the mixture was added  $\text{I}_2/\text{THF}$  at  $0\text{ }^\circ\text{C}$  and the mixture was stirred at room temperature for 6 h. The reaction mixture was quenched with water at  $0\text{ }^\circ\text{C}$ . The aqueous mixture was extracted with hexane. The organic layer was dried over  $\text{Na}_2\text{SO}_4$  and concentrated. The residue was purified with silica gel column chromatography (*n*-hexane).  $\text{Pd}(\text{PPh}_3)_4$  (2 mol %, 0.668 mmol, 771.9 mg) and  $\text{CuI}$  (2 mol %, 0.668 mmol, 127.2 mg) were placed in a 100 mL two-necked flask Under an Ar atmosphere. To the flask was added  $\text{Et}_2\text{NH}$  (30 mL) and then iodine compounds (33.4 mmol) in THF (30 mL) via syringe. Then trimethylsilyl acetylene (36.7 mmol, 5.2 mL) was added. After stirring for 17 h, the

reaction mixture was checked with TLC (hexane). The mixture was poured into water at 0 °C. The aqueous mixture was extracted with Et<sub>2</sub>O. The organic layer was washed with 2 M aq. HCl and then washed with saturated aq. NaHCO<sub>3</sub>. The organic layer was dried over Na<sub>2</sub>SO<sub>4</sub> and concentrated. The residue was purified with silica gel column (hexane) and then distilled.

### Synthesis of the 1,3-enynes **2**<sup>2</sup>

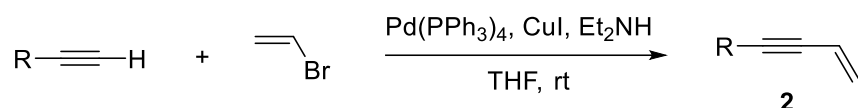

Copper (I) iodide (152.4 mg, 0.8 mmol) and Pd(PPh<sub>3</sub>)<sub>4</sub> (231.1 mg, 0.2 mmol) were dissolved in diethylamine (20 mL, 0.5 mL/1.0 mmol alkyne) under an Ar atmosphere which was then cooled to 0 °C. Terminal alkyne (4.1 g, 40 mmol, 1 equiv) and vinyl bromide (52 mL, 52 mmol, 1.3 equiv, 1.0 M in THF) were added and the resulting mixture was left to stir and warmed up to room temperature until complete conversion of the starting material was observed from TLC. The reaction mixture was washed with water followed by extraction with *n*-pentane:diethyl ether (1:1). The combined organic layers were washed with 1 M HCl and dried over magnesium sulfate. The crude product was afforded after evaporation of the solvent in vacuo and ready to be purified by column chromatography to afford 1,3-enynes **2**.

### Synthesis of pyrazolones **3**<sup>3,4</sup>

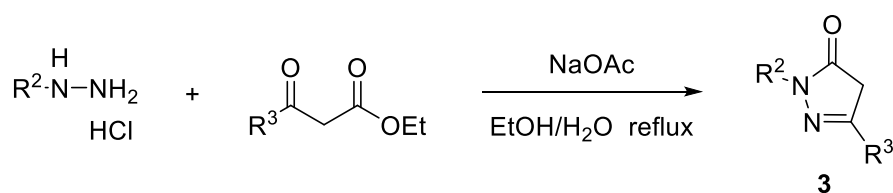

Sodium acetate (328 mg, 4 mmol) was added to the solvent of aromatic hydrazine hydrochloride derivatives (4 mmol) in 5 mL of EtOH and 1 mL of water, and the mixture was stirred at room temperature for 5 min. Then, ethyl acetoacetate (521 mg, 4 mmol) was added, and the mixture reaction was heated to reflux for 3 h. After that, the mixture was poured dropwisely into crushed ice (50 g) with vigorous stirring, and the resulting precipitate was then filtered and crystallized with EtOH. These pyrazolone derivatives were directly employed for the synthesis of pyrazolonethioethers without further purification.



### 3. Optimization for Asymmetric Sequential Hydroalkylation with 1,3-Enynes

Table S1. Screening chiral ligands for Pd-catalyzed asymmetric sequential hydroalkylation of 1,3-enyne **1a** with pyrazolone **3a**<sup>a</sup>

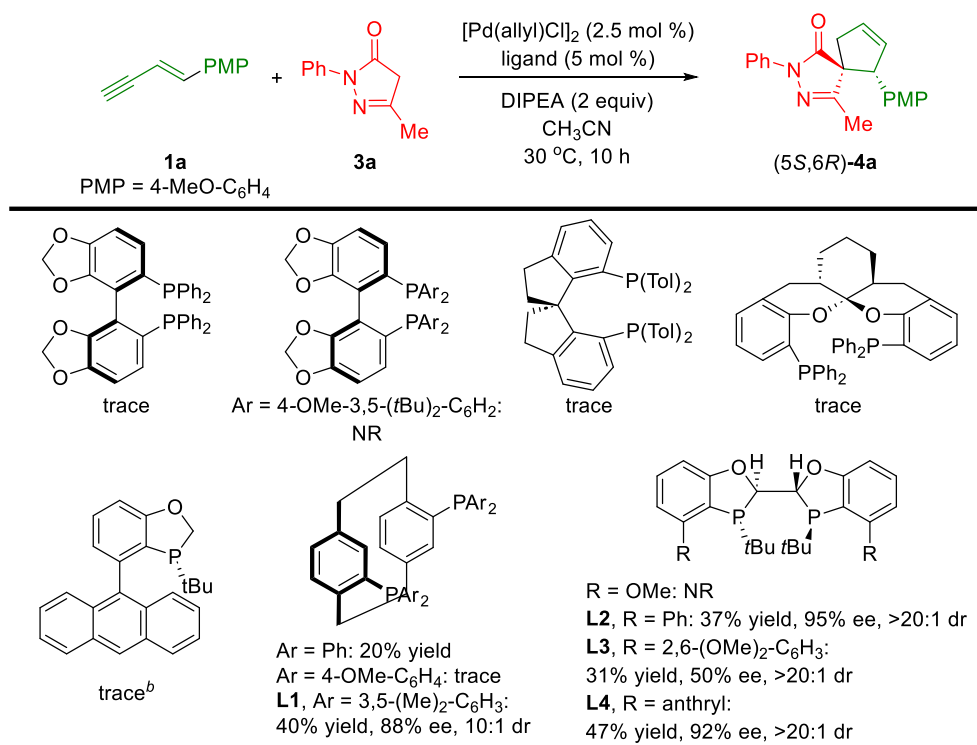

<sup>a</sup>Reactions were performed with **1a** (0.1 mmol), **3a** (0.12 mmol), [Pd(allyl)Cl]<sub>2</sub> (2.5 mol %), ligand (5 mol %) and DIPEA (2 equiv) in 0.5 mL of CH<sub>3</sub>CN at 30 °C for 10 h. Yield of isolated product, dr was determined by <sup>1</sup>H NMR, ee was determined by chiral HPLC. <sup>b</sup>Ligand (10 mol %). DIPEA = *N,N*-diisopropylethylamine. NR = no reaction.

**Table S2. Screening base for Pd-catalyzed asymmetric sequential hydroalkylation of 1,3-enyne **1a** with pyrazolone **3a**<sup>a</sup>**

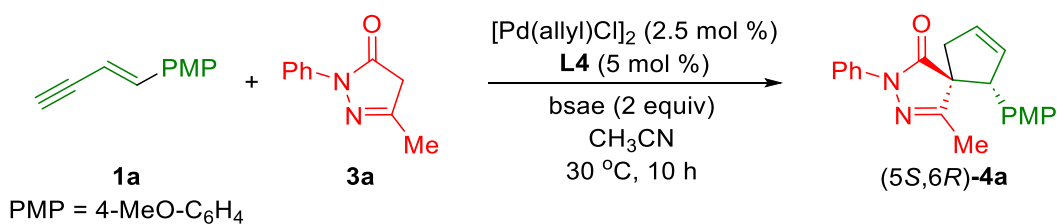

| entry | base                           | yield (%) <sup>b</sup> | ee (%) <sup>c</sup> | dr <sup>d</sup> |
|-------|--------------------------------|------------------------|---------------------|-----------------|
| 1     | DIPEA                          | 47                     | 92                  | >20:1           |
| 2     | Et <sub>3</sub> N              | 46                     | 92                  | 5:1             |
| 3     | Cy <sub>2</sub> NMe            | 56                     | 92                  | 6:1             |
| 4     | K <sub>2</sub> CO <sub>3</sub> | 55                     | 91                  | 4:1             |

<sup>a</sup>Reactions were performed with **1a** (0.1 mmol), **3a** (0.12 mmol), [Pd(allyl)Cl]<sub>2</sub> (2.5 mol %), **L4** (5 mol %), base (2 equiv) in 0.5 mL of CH<sub>3</sub>CN at 30 °C for 10 h. <sup>b</sup>Isolated yield. <sup>c</sup>ee was determined by chiral HPLC. <sup>d</sup>dr was determined by <sup>1</sup>H NMR.

**Table S3. Further investigation of solvent effect on the enantioselectivity<sup>a</sup>**

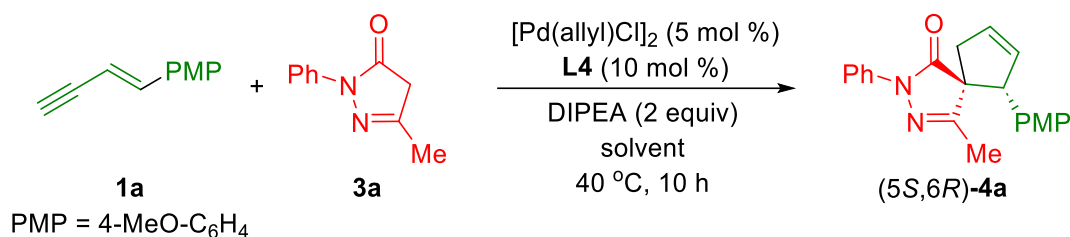

| entry | solvent (C <sub>6</sub> HF <sub>5</sub> + CH <sub>3</sub> CN) | yield (%) <sup>b</sup> | ee (%) <sup>c</sup> | dr <sup>d</sup> |
|-------|---------------------------------------------------------------|------------------------|---------------------|-----------------|
| 1     | 0.5 mL + 0 mL                                                 | 54                     | 0                   | 10:1            |
| 2     | 0.49 mL + 0.01 mL                                             | 51                     | 4                   | 10:1            |
| 3     | 0.45 mL + 0.05 mL                                             | 63                     | 45                  | 10:1            |
| 4     | 0.40 mL + 0.10 mL                                             | 71                     | 70                  | 10:1            |
| 5     | 0.30 mL + 0.20 mL                                             | 68                     | 82                  | 10:1            |
| 6     | 0.20 mL + 0.30 mL                                             | 77                     | 93                  | 10:1            |
| 7     | 0.10 mL + 0.40 mL                                             | 71                     | 92                  | 10:1            |
| 8     | 0 mL + 0.5 mL                                                 | 69                     | 94                  | 8:1             |

<sup>a</sup>Reactions were performed with **1a** (0.1 mmol), **3a** (0.12 mmol), [Pd(allyl)Cl]<sub>2</sub> (5 mol %), **L4** (10 mol %), DIPEA (2 equiv) in 0.5 mL of solvent at 40 °C for 10 h. <sup>b</sup>Isolated yield. <sup>c</sup>ee was determined by chiral HPLC. <sup>d</sup>dr was determined by <sup>1</sup>H NMR.

**Table S4. Screening chiral ligands for Pd-catalyzed asymmetric sequential hydroalkylation of 1,3-enyne **2a** with pyrazolone **3a**<sup>a</sup>**

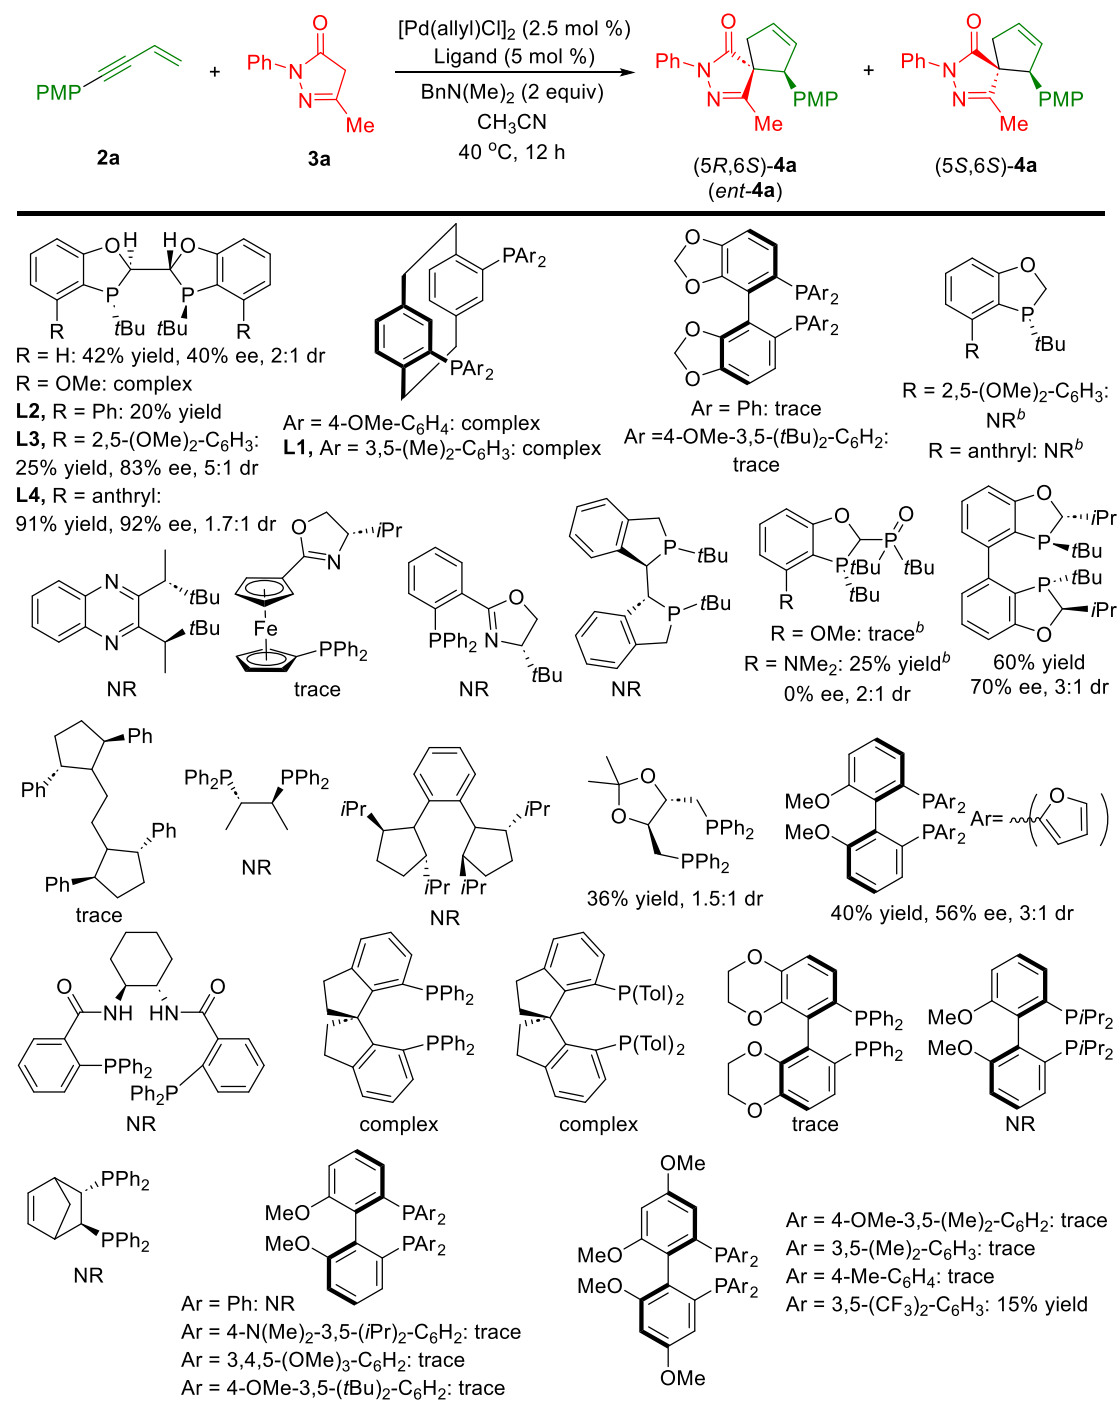

<sup>a</sup>Reactions were performed with **2a** (0.12 mmol), **3a** (0.1 mmol), [Pd(allyl)Cl]<sub>2</sub> (2.5 mol %), ligand (5 mol %) and BnN(Me)<sub>2</sub> (2 equiv) in 0.5 mL of CH<sub>3</sub>CN at 40 °C for 12 h. Yield of isolated product, ee was determined by chiral HPLC, dr was determined by <sup>1</sup>H NMR. <sup>b</sup>Ligand (10.0 mol %).

**Table S5. Screening base for Pd-catalyzed asymmetric sequential hydroalkylation of internal 1,3-enyne **2a** with pyrazolone **3a**<sup>a</sup>**

| entry | base                 | yield (%) <sup>b</sup> | ee of (5 <i>R</i> ,6 <i>S</i> )- <b>4a</b> (%) <sup>c</sup> | dr <sup>c</sup> |
|-------|----------------------|------------------------|-------------------------------------------------------------|-----------------|
| 1     | DMAP                 | trace                  |                                                             |                 |
| 2     | Et <sub>3</sub> N    | 48                     | 92                                                          | 1:1             |
| 3     | DIPEA                | 20                     | 85                                                          | 1:1             |
| 4     | BnN(Me) <sub>2</sub> | 91                     | 92                                                          | 1.7:1           |
| 5     | BnN(Et) <sub>2</sub> | 78                     | -                                                           | 1.5:1           |
| 6     | BnN(Me)(Et)          | 74                     |                                                             | 1.5:1           |
| 7     | Bn <sub>2</sub> NMe  | trace                  | -                                                           | -               |
| 8     | Bn <sub>3</sub> N    | trace                  | -                                                           | -               |
| 9     |                      | trace                  | -                                                           | -               |
| 10    |                      | trace                  | -                                                           | -               |
| 11    |                      | 33                     | -                                                           | -               |
| 12    | PMP                  | 20                     | -                                                           | -               |
| 13    | DBU                  | trace                  | -                                                           | -               |
| 14    | DABCO                | 15                     | -                                                           | -               |
| 15    | quinuclidine         | trace                  | -                                                           | -               |

<sup>a</sup>Reactions were performed with **2a** (0.12 mmol), **3a** (0.1mmol), [Pd(allyl)Cl]<sub>2</sub> (2.5 mol %), **L4** (5 mol %), base (2 equiv) in 0.5 mL of CH<sub>3</sub>CN at 40 °C for 12 h. <sup>b</sup>Isolated yield. <sup>c</sup>ee was determined by chiral HPLC. <sup>d</sup>dr was determined by <sup>1</sup>H-NMR. DMAP = 4-Dimethylaminopyridine. PMP = 1,2,2,6,6-Pentamethylenepiperidine. DBU = 1,8-Diazabicyclo[5.4.0]undec-7-ene. DABCO = 1,4-Diazabicyclo[2.2.2]octane.

## 4. General Procedure for Asymmetric Sequential Hydroalkylation with 1,3-Enynes

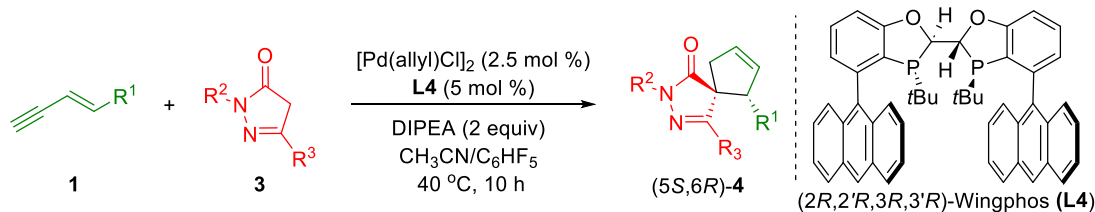

Dissolving the [Pd(allyl)Cl]<sub>2</sub> (0.9 mg, 2.5 mol %), and **L4** (3.7 mg, 5 mol %) in a mixed solvent of CH<sub>3</sub>CN/C<sub>6</sub>HF<sub>5</sub> (3:2, 0.5 mL, 0.2 M) was stirred for 15 min at room temperature. Subsequently, 1,3-enynes **1** (0.1 mmol, 1 equiv), pyrazolones **3** (0.12 mmol, 1.2 equiv), and DIPEA (2 equiv, 32 μL) were added. The reaction mixture was stirred at 40 °C for 10 h under an Ar atmosphere. The solution was concentrated in vacuo and the crude product was purified by column chromatography on silica gel (*n*-hexane:EtOAc = 95:5 to 90:10) to afford the spiropyrazolones (5*S*, 5*R*)-**4**.

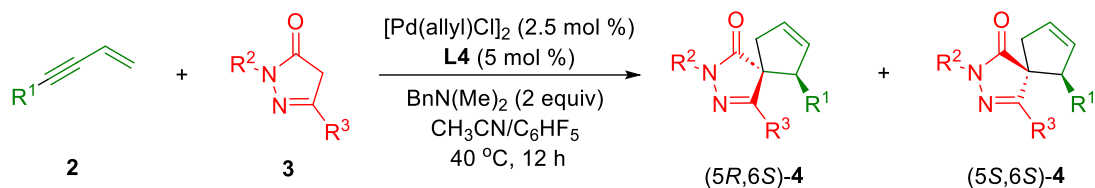

In an Ar-filled glovebox, dissolving the [Pd(allyl)Cl]<sub>2</sub> (0.9 mg, 2.5 mol %), and **L4** (3.7 mg, 5 mol %) in a mixed solvent of CH<sub>3</sub>CN/C<sub>6</sub>HF<sub>5</sub> (3:2, 0.5 mL, 0.2 M) was stirred for 15 min at room temperature. Subsequently, 1,3-enynes **2** (0.2 mmol, 1.2 equiv), pyrazolones **3** (0.1 mmol, 1 equiv), and BnN(Me)<sub>2</sub> (2 equiv, 30 μL) were added. The reaction mixture was stirred at 40 °C for 12 h outside the glove box. The solution was concentrated in vacuo and the crude product was purified by column chromatography on silica gel (*n*-hexane:EtOAc = 95:5 to 90:10) to afford the spiropyrazolones (5*R*, 6*S*)-**4** and (5*S*, 6*S*)-**4**.

**(5*S*,6*R*)-6-(4-methoxyphenyl)-4-methyl-2-phenyl-2,3-diazaspiro[4.4]nona-3,7-dien-1-one**

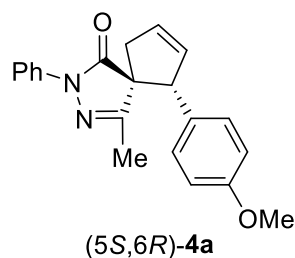

Yellow oil, 26.2 mg, 79% yield, 93% ee, 10:1 dr.  $R_f = 0.40$  (*n*-hexane:EtOAc = 5:1).

$[\alpha]_D^{20} = +19.87$  (*c* 1.0, CHCl<sub>3</sub>).

<sup>1</sup>H NMR (400 MHz, CDCl<sub>3</sub>, ppm):  $\delta$  7.91 (d, *J* = 8.2 Hz, 2H), 7.41 (t, *J* = 7.8 Hz, 2H), 7.19 (t, *J* = 7.6 Hz, 1H), 7.02 (d, *J* = 8.8 Hz, 2H), 6.77 (d, *J* = 8.4 Hz, 2H), 6.08-6.03 (m, 1H), 6.01-5.96 (m, 1H), 4.67 (s, 1H), 3.75 (s, 3H), 3.05-2.96 (m, 1H), 2.75-2.67 (m, 1H), 1.68 (s, 3H).

<sup>13</sup>C NMR (100 MHz, CDCl<sub>3</sub>, ppm):  $\delta$  176.9, 163.0, 159.0, 138.3, 131.7, 130.0, 129.4, 129.0, 128.1, 125.0, 119.0, 114.0, 64.5, 59.3, 55.3, 40.7, 15.2.

**HPLC analysis:** Daicel CHIRALPAK AD-H, *n*-hexane:*i*-PrOH = 80:20, flow rate = 1.0 mL/min,  $\lambda = 254$  nm, retention time:  $t_{\text{minor}} = 9.5$  min,  $t_{\text{major}} = 11.2$  min.

**HRMS** (ESI) calcd for C<sub>21</sub>H<sub>21</sub>N<sub>2</sub>O<sub>2</sub> [M + H]<sup>+</sup>: 333.1598, found 333.1598.

**(5*R*,6*S*)-6-(4-methoxyphenyl)-4-methyl-2-phenyl-2,3-diazaspiro[4.4]nona-3,7-dien-1-one**

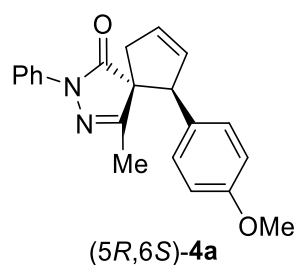

Yellow oil, 21.2 mg, 64% yield, 91% ee.

**HPLC analysis:** Daicel CHIRALPAK AD-H, *n*-hexane:*i*-PrOH = 80:20, flow rate = 1.0 mL/min,  $\lambda = 254$  nm, retention time:  $t_{\text{major}} = 9.5$  min,  $t_{\text{minor}} = 11.0$  min.

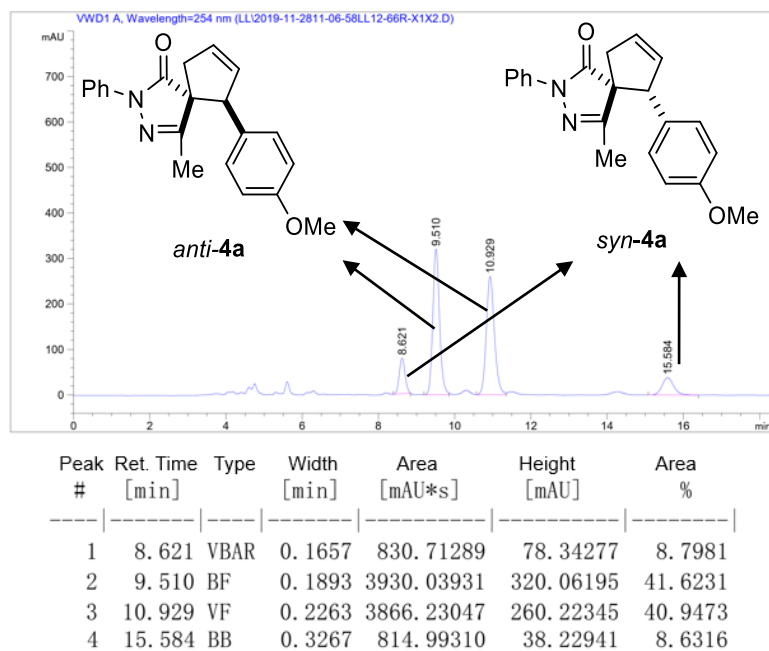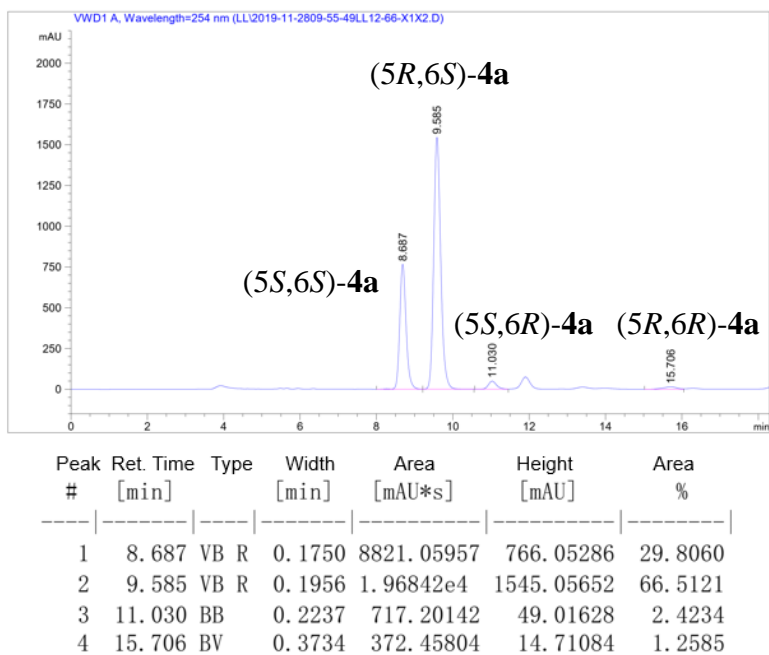

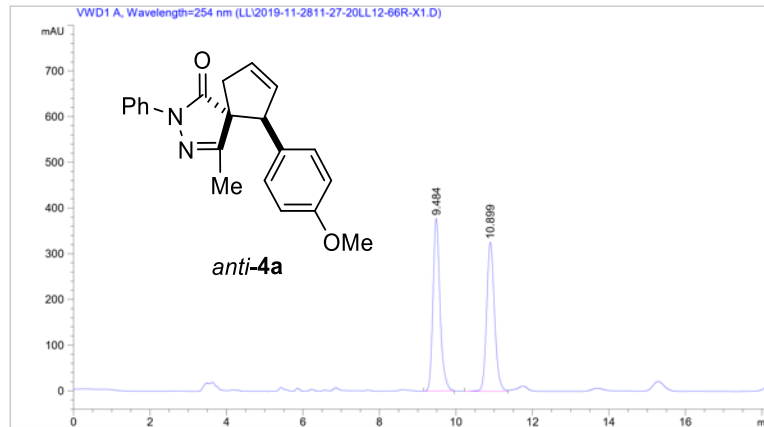

| Peak # | Ret. Time [min] | Type | Width [min] | Area [mAU*s] | Height [mAU] | Area %  |
|--------|-----------------|------|-------------|--------------|--------------|---------|
| 1      | 9.484           | BBA  | 0.1935      | 4800.84180   | 377.13745    | 50.6649 |
| 2      | 10.899          | BF   | 0.2192      | 4674.84180   | 326.15051    | 49.3351 |

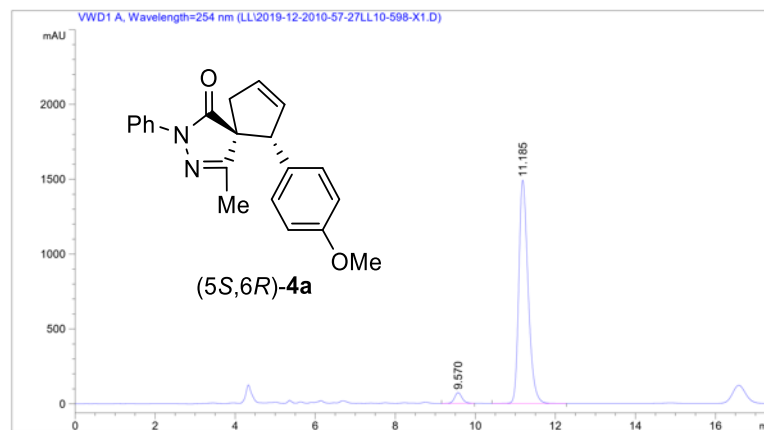

| Peak # | Ret. Time [min] | Type | Width [min] | Area [mAU*s] | Height [mAU] | Area %  |
|--------|-----------------|------|-------------|--------------|--------------|---------|
| 1      | 9.570           | BBA  | 0.1999      | 938.16968    | 72.03567     | 3.7535  |
| 2      | 11.185          | BB   | 0.2470      | 2.40561e4    | 1492.87915   | 96.2465 |

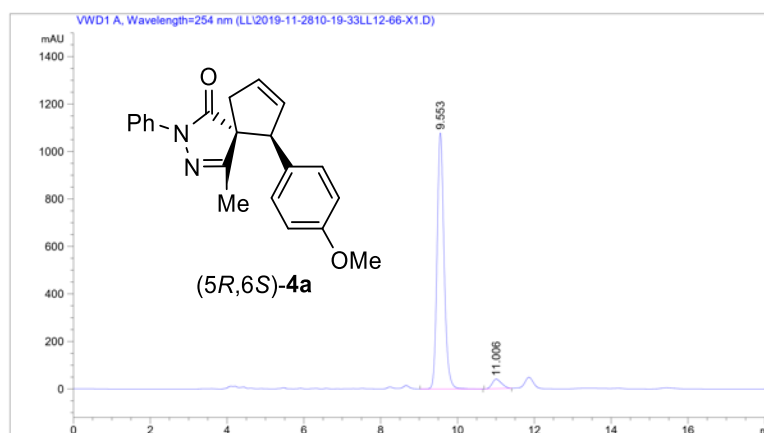

| Peak # | Ret. Time [min] | Type | Width [min] | Area [mAU*s] | Height [mAU] | Area %  |
|--------|-----------------|------|-------------|--------------|--------------|---------|
| 1      | 9.553           | VB R | 0.1934      | 1.36298e4    | 1078.74915   | 95.2512 |
| 2      | 11.006          | BB   | 0.2587      | 679.51477    | 40.09328     | 4.7488  |



**(5*S*,6*S*)-6-(4-methoxyphenyl)-4-methyl-2-phenyl-2,3-diazaspiro[4.4]nona-3,7-dien-1-one**

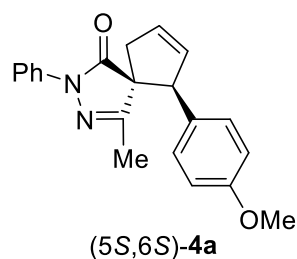

Yellow oil, 9.6 mg, 29% yield, 94% ee.  $R_f = 0.35$  (*n*-hexane:EtOAc = 5:1).  $[\alpha]_D^{20} = -22.82$  (*c* 1.0, CHCl<sub>3</sub>).

<sup>1</sup>H NMR (600 MHz, CDCl<sub>3</sub>, ppm):  $\delta$  7.43 (d,  $J = 7.8$  Hz, 2H), 7.28-7.19 (m, 5H), 7.12 (d,  $J = 7.2$  Hz, 2H), 7.07 (t,  $J = 7.2$  Hz, 1H), 6.12-6.08 (m, 1H), 5.92-5.88 (m, 1H), 4.34 (t,  $J = 1.8$  Hz, 1H), 2.98-2.92 (m, 1H), 2.75-2.69 (m, 1H), 2.26 (s, 3H).

<sup>13</sup>C NMR (150 MHz, CDCl<sub>3</sub>, ppm):  $\delta$  174.1, 162.9, 159.2, 137.9, 131.7, 130.6, 129.4, 129.3, 128.7, 124.8, 119.2, 113.7, 63.0, 58.4, 55.3, 39.4, 13.8.

**HPLC analysis:** Daicel CHIRALPAK AD-H, *n*-hexane:*i*-PrOH = 80:20, flow rate = 1.0 mL/min,  $\lambda = 254$  nm, retention time:  $t_{\text{major}} = 8.7$  min,  $t_{\text{minor}} = 15.7$  min.

**HRMS (ESI)** calcd for C<sub>21</sub>H<sub>21</sub>N<sub>2</sub>O<sub>2</sub> [M + H]<sup>+</sup>: 333.1598, found 333.1598.

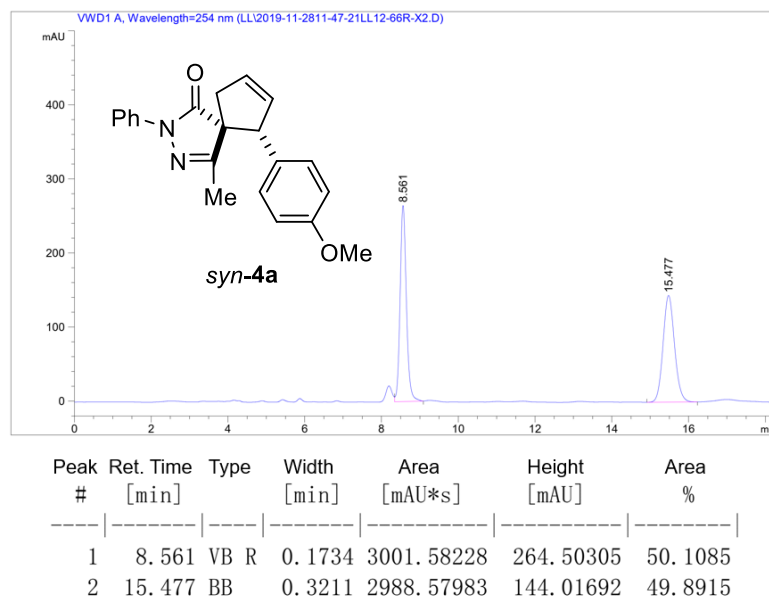

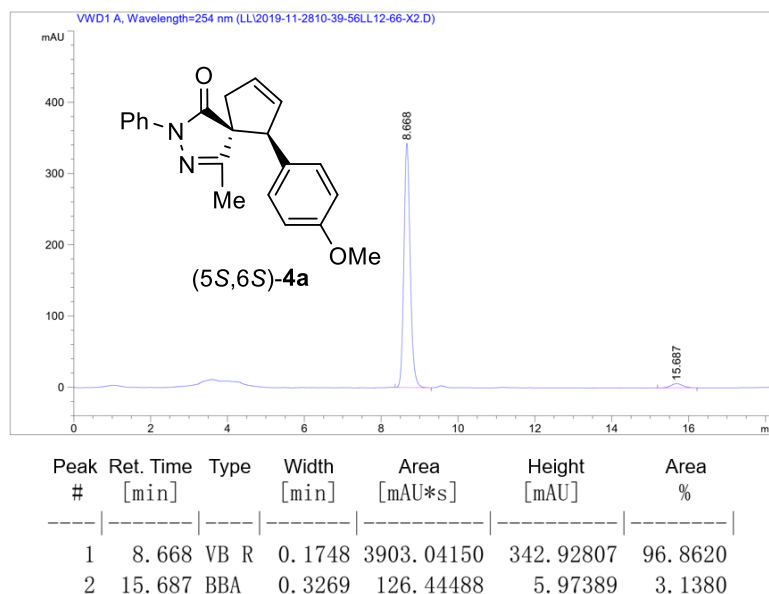

**(5S,6R)-4-methyl-2,6-diphenyl-2,3-diazaspiro[4.4]nona-3,7-dien-1-one**

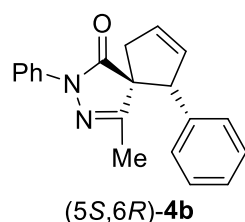

Yellow oil, 21.1 mg, 70% yield, 94% ee, 10:1 dr.  $R_f = 0.45$  (*n*-hexane:EtOAc = 5:1).

$[\alpha]_D^{20} = +24.08$  (*c* 1.0, CHCl<sub>3</sub>).

<sup>1</sup>H NMR (400 MHz, CDCl<sub>3</sub>, ppm):  $\delta$  7.91 (d, *J* = 8.0 Hz, 2H), 7.41 (t, *J* = 7.6 Hz, 2H), 7.27-7.17 (m, 4H), 7.13-7.07 (m, 2H), 6.12-6.06 (m, 1H), 6.04-5.97 (m, 1H), 6.01-5.96 (m, 1H), 4.71 (s, 1H), 3.07-2.97 (m, 1H), 2.75-2.67 (m, 1H), 2.76-2.67 (m, 1H), 1.65 (s, 3H).

<sup>13</sup>C NMR (100 MHz, CDCl<sub>3</sub>, ppm):  $\delta$  176.8, 162.8, 138.2, 138.1, 131.3, 129.7, 129.0, 128.7, 127.7, 127.1, 125.1, 119.0, 64.4, 59.8, 40.8, 15.1.

**HPLC analysis:** Daicel CHIRALPAK AD-H, *n*-hexane:*i*-PrOH = 80:20, flow rate = 1.0 mL/min,  $\lambda = 254$  nm, retention time:  $t_{\text{minor}} = 7.1$  min,  $t_{\text{major}} = 10.6$  min.

**HRMS (ESI)** calcd for C<sub>20</sub>H<sub>19</sub>N<sub>2</sub>O [M + H]<sup>+</sup>: 303.1492, found 303.1491.

**(5R,6S)-4-methyl-2,6-diphenyl-2,3-diazaspiro[4.4]nona-3,7-dien-1-one**

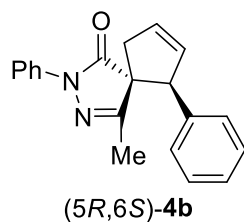

Yellow solid, 21.2 mg, 70% yield, 90% ee.

**HPLC analysis:** Daicel CHIRALPAK AD-H, *n*-hexane:*i*-PrOH = 80:20, flow rate = 1.0 mL/min,  $\lambda$  = 254 nm, retention time:  $t_{\text{major}}$  = 7.1 min,  $t_{\text{minor}}$  = 10.5 min.

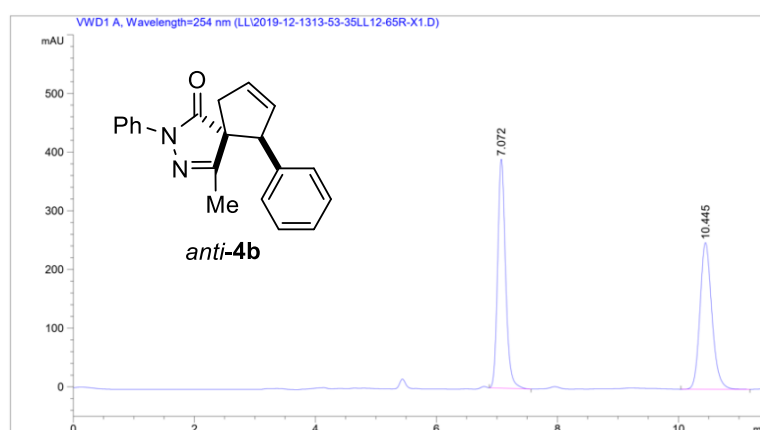

| Peak # | Ret. Time [min] | Type | Width [min] | Area [mAU*s] | Height [mAU] | Area %  |
|--------|-----------------|------|-------------|--------------|--------------|---------|
| 1      | 7.072           | BB   | 0.1388      | 3538.88135   | 390.26102    | 50.8174 |
| 2      | 10.445          | BB   | 0.2100      | 3425.03931   | 249.70245    | 49.1826 |

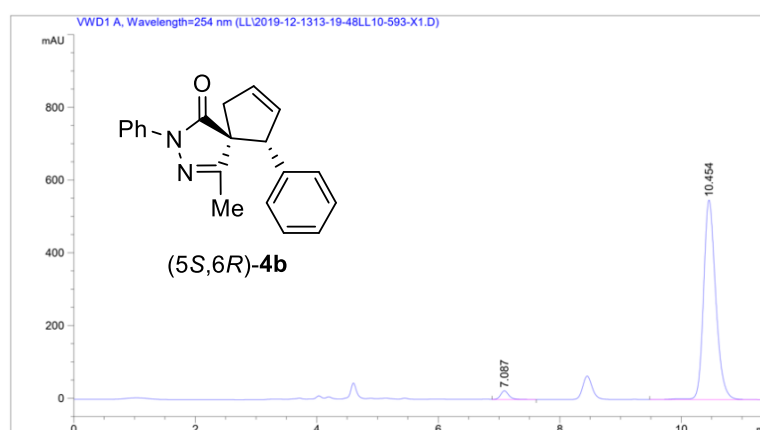

| Peak # | Ret. Time [min] | Type | Width [min] | Area [mAU*s] | Height [mAU] | Area %  |
|--------|-----------------|------|-------------|--------------|--------------|---------|
| 1      | 7.087           | VB S | 0.1438      | 226.00227    | 23.80328     | 2.8735  |
| 2      | 10.454          | VB R | 0.2104      | 7638.99854   | 548.74799    | 97.1265 |

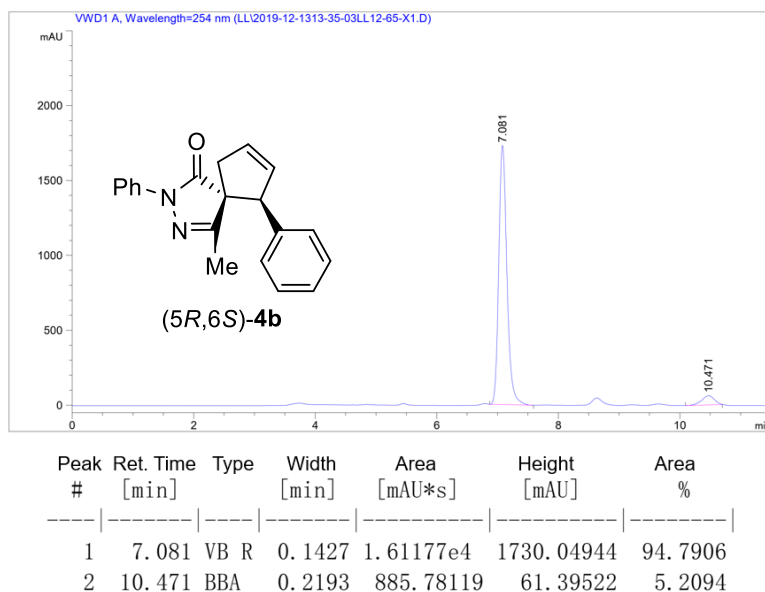

**(5S,6S)-4-methyl-2,6-diphenyl-2,3-diazaspiro[4.4]nona-3,7-dien-1-one**

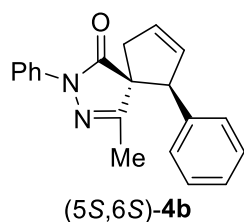

White solid, 7.8 mg, 26% yield, 95% ee.  $R_f = 0.40$  (*n*-hexane:EtOAc = 5:1).  $[\alpha]_D^{20} = -16.31$  (*c* 1.0, CHCl<sub>3</sub>).

<sup>1</sup>H NMR (600 MHz, CDCl<sub>3</sub>, ppm):  $\delta$  7.43 (d, *J* = 7.8 Hz, 2H), 7.28-7.19 (m, 5H), 7.12 (d, *J* = 7.2 Hz, 2H), 7.07 (t, *J* = 7.2 Hz, 1H), 6.12-6.08 (m, 1H), 5.92-5.88 (m, 1H), 4.34 (t, *J* = 1.8 Hz, 1H), 2.98-2.92 (m, 1H), 2.75-2.69 (m, 1H), 2.26 (s, 3H).

<sup>13</sup>C NMR (150 MHz, CDCl<sub>3</sub>, ppm):  $\delta$  173.9, 162.8, 137.8, 137.2, 131.3, 131.0, 128.7, 128.3, 128.3, 127.8, 124.8, 119.2, 63.0, 58.9, 39.4, 13.9.

**HPLC analysis:** Daicel CHIRALPAK AD-H, *n*-hexane:*i*-PrOH = 80:20, flow rate = 1.0 mL/min,  $\lambda = 254$  nm, retention time:  $t_{\text{major}} = 7.1$  min,  $t_{\text{minor}} = 8.4$  min.

**HRMS** (ESI) calcd for C<sub>20</sub>H<sub>19</sub>N<sub>2</sub>O [M + H]<sup>+</sup>: 303.1492, found 303.1492.

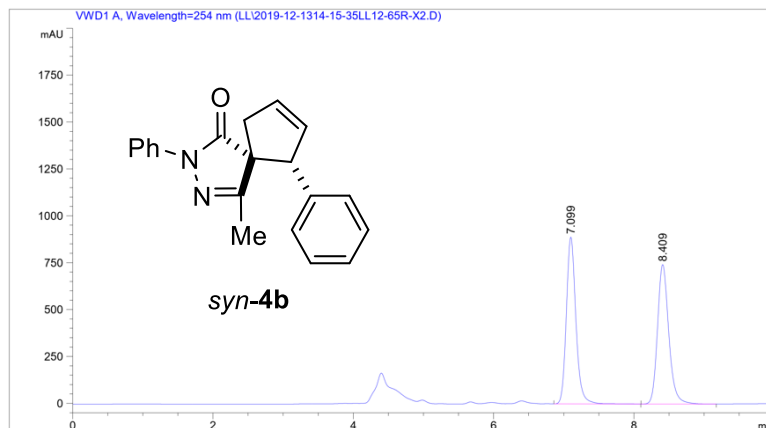

| Peak # | Ret. Time [min] | Type | Width [min] | Area [mAU*s] | Height [mAU] | Area %  |
|--------|-----------------|------|-------------|--------------|--------------|---------|
| 1      | 7.099           | BV R | 0.1446      | 8432.69922   | 889.37305    | 50.3384 |
| 2      | 8.409           | BB   | 0.1705      | 8319.33301   | 743.60504    | 49.6616 |

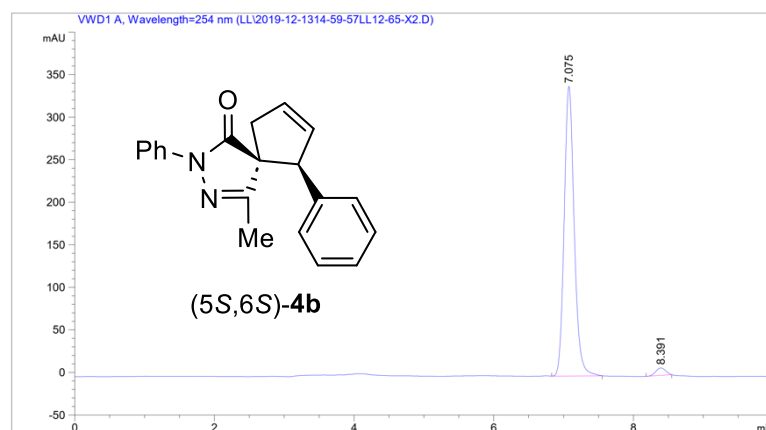

| Peak # | Ret. Time [min] | Type | Width [min] | Area [mAU*s] | Height [mAU] | Area %  |
|--------|-----------------|------|-------------|--------------|--------------|---------|
| 1      | 7.075           | BBA  | 0.1523      | 3391.32300   | 340.28882    | 97.5233 |
| 2      | 8.391           | BBA  | 0.1563      | 86.12506     | 8.79254      | 2.4767  |

**(5S,6R)- 4-methyl-2-phenyl-6-(p-tolyl)-2,3-diazaspiro[4.4]nona-3,7-dien-1-one**

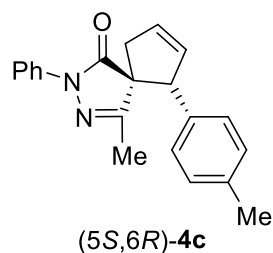

Yellow oil, 24.2 mg, 77% yield, 94% ee, 9:1 dr.  $R_f = 0.46$  (*n*-hexane:EtOAc = 5:1).

$[\alpha]_D^{20} = +34.99$  (*c* 1.0, CHCl<sub>3</sub>).

<sup>1</sup>H NMR (400 MHz, CDCl<sub>3</sub>, ppm):  $\delta$  7.91 (d, *J* = 8.4 Hz, 2H), 7.41 (t, *J* = 7.6 Hz, 2H), 7.20 (t, *J* = 7.2 Hz, 1H), 7.05 (d, *J* = 8.0 Hz, 2H), 7.00 (d, *J* = 8.0 Hz, 2H), 6.11-6.05 (m, 1H), 6.02-5.96 (m, 1H), 4.67 (s, 1H), 3.75 (s, 3H), 3.05-2.96 (m, 1H), 2.75-2.67 (m, 1H), 1.68 (s, 3H).

<sup>13</sup>C NMR (100 MHz, CDCl<sub>3</sub>, ppm):  $\delta$  176.9, 163.0, 159.0, 138.3, 131.7, 130.0, 129.4, 129.0, 128.1, 125.0, 119.0, 114.0, 64.5, 59.3, 55.3, 40.7, 15.2.

**HPLC analysis:** Daicel CHIRALPAK AD-H, *n*-hexane:*i*-PrOH = 80:20, flow rate = 1.0 mL/min,  $\lambda = 254$  nm, retention time:  $t_{\text{minor}} = 7.3$  min,  $t_{\text{major}} = 10.1$  min.

**HRMS** (ESI) calcd for C<sub>21</sub>H<sub>21</sub>N<sub>2</sub>O [M + H]<sup>+</sup>: 317.1648, found 317.1645.

**(5R,6S)- 4-methyl-2-phenyl-6-(p-tolyl)-2,3-diazaspiro[4.4]nona-3,7-dien-1-one**

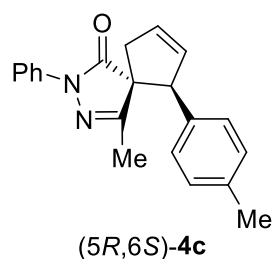

Yellow oil, 22.2 mg, 70% yield, 93% ee. **HPLC analysis:** Daicel CHIRALPAK AD-H, *n*-hexane:*i*-PrOH = 80:20, flow rate = 1.0 mL/min,  $\lambda = 254$  nm, retention time:  $t_{\text{major}} = 7.3$  min,  $t_{\text{minor}} = 10.2$  min.

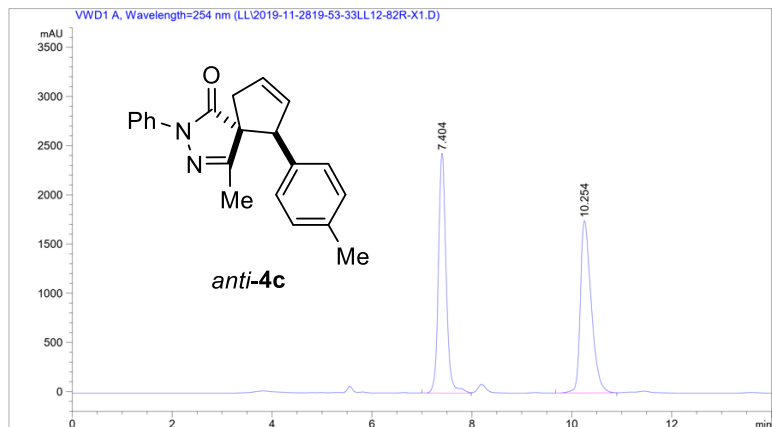

| Peak # | Ret. Time [min] | Type | Width [min] | Area [mAU*s] | Height [mAU] | Area %  |
|--------|-----------------|------|-------------|--------------|--------------|---------|
| 1      | 7.404           | BF   | 0.1643      | 2.61771e4    | 2437.52490   | 49.7000 |
| 2      | 10.254          | BF   | 0.2296      | 2.64932e4    | 1750.05737   | 50.3000 |

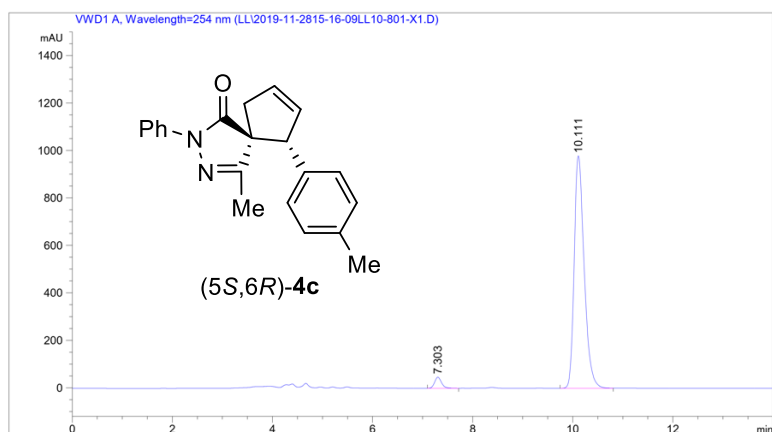

| Peak # | Ret. Time [min] | Type | Width [min] | Area [mAU*s] | Height [mAU] | Area %  |
|--------|-----------------|------|-------------|--------------|--------------|---------|
| 1      | 7.303           | FF   | 0.1457      | 447.06006    | 47.09787     | 3.1881  |
| 2      | 10.111          | FF   | 0.2118      | 1.35757e4    | 979.00830    | 96.8119 |

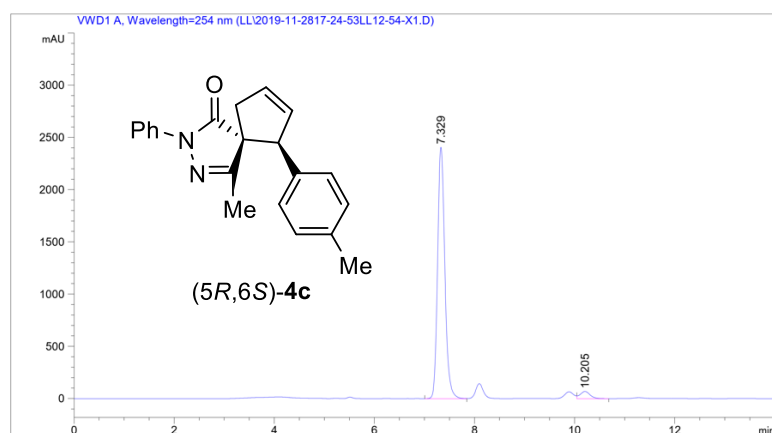

| Peak # | Ret. Time [min] | Type | Width [min] | Area [mAU*s] | Height [mAU] | Area %  |
|--------|-----------------|------|-------------|--------------|--------------|---------|
| 1      | 7.329           | BV   | 0.1555      | 2.42266e4    | 2406.49438   | 96.2539 |
| 2      | 10.205          | VF   | 0.2079      | 942.86719    | 68.78529     | 3.7461  |

**(5*S*,6*S*)- 4-methyl-2-phenyl-6-(*p*-tolyl)-2,3-diazaspiro[4.4]nona-3,7-dien-1-one**

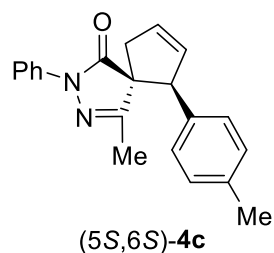

Yellow oil, 8.2 mg, 26% yield, 89% ee.  $R_f = 0.42$  (*n*-hexane:EtOAc = 5:1).  $[\alpha]_D^{20} = -22.26$  (*c* 1.0, CHCl<sub>3</sub>).

<sup>1</sup>H NMR (600 MHz, CDCl<sub>3</sub>, ppm):  $\delta$  7.48 (d,  $J = 7.2$  Hz, 2H), 7.26 (t,  $J = 7.2$  Hz, 2H), 7.07 (q,  $J = 4.8$  Hz, 3H), 7.01 (d,  $J = 7.8$  Hz, 2H), 6.10-6.06 (m, 1H), 5.91-5.86 (m, 1H), 4.30 (s, 1H), 2.99-2.92 (m, 1H), 2.74-2.67 (m, 1H), 2.28 (s, 3H), 2.25 (s, 3H).

<sup>13</sup>C NMR (150 MHz, CDCl<sub>3</sub>, ppm):  $\delta$  174.0, 162.9, 137.9, 137.4, 134.2, 131.6, 130.6, 129.0, 128.7, 128.3, 124.8, 119.2, 62.9, 58.6, 39.5, 21.2, 13.8.

**HPLC analysis:** Daicel CHIRALPAK AD-H, *n*-hexane:*i*-PrOH = 80:20, flow rate = 1.0 mL/min,  $\lambda = 254$  nm, retention time:  $t_{\text{major}} = 6.6$  min,  $t_{\text{minor}} = 10.3$  min.

**HRMS (ESI) calcd for C<sub>21</sub>H<sub>21</sub>N<sub>2</sub>O [M + H]<sup>+</sup>: 317.1648, found 317.1650.**

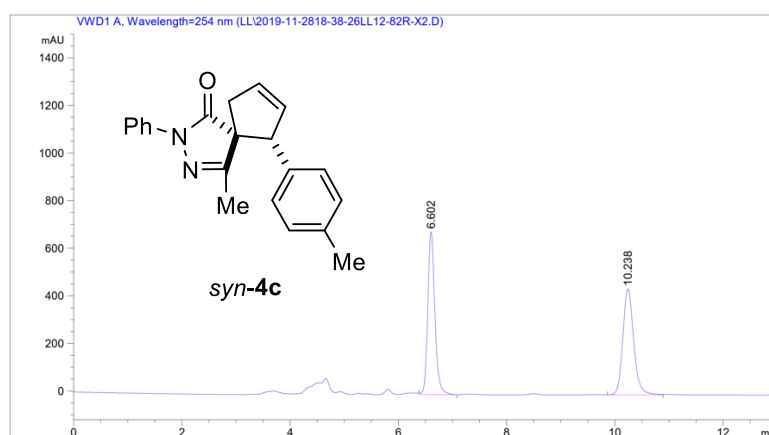

| Peak # | Ret. Time [min] | Type | Width [min] | Area [mAU*s] | Height [mAU] | Area %  |
|--------|-----------------|------|-------------|--------------|--------------|---------|
| 1      | 6.602           | VB R | 0.1386      | 6182.14307   | 683.11212    | 49.8540 |
| 2      | 10.238          | FFA  | 0.2128      | 6218.35596   | 445.52859    | 50.1460 |



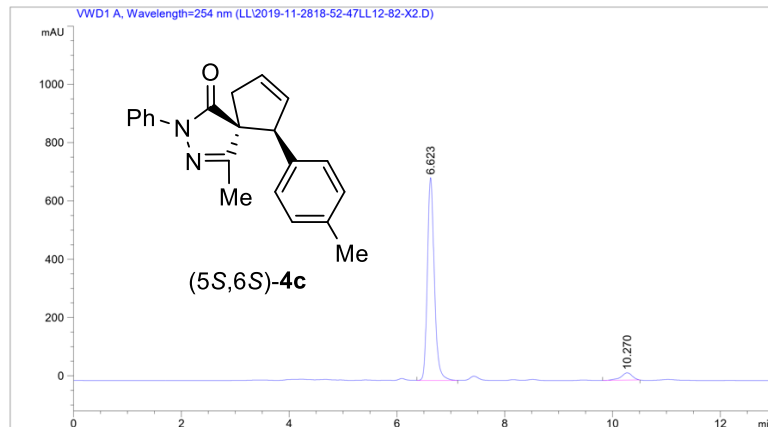

| Peak # | Ret. Time [min] | Type | Width [min] | Area [mAU*s] | Height [mAU] | Area %  |
|--------|-----------------|------|-------------|--------------|--------------|---------|
| 1      | 6.623           | VV   | 0.1380      | 6256.38184   | 695.35980    | 94.4857 |
| 2      | 10.270          | BBA  | 0.2187      | 365.12720    | 25.10624     | 5.5143  |

**(5S,6R)-4-methyl-2-phenyl-6-(m-tolyl)-2,3-diazaspiro[4.4]nona-3,7-dien-1-one**

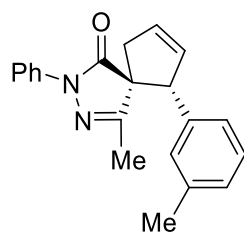

**(5S,6R)-4d**

Yellow oil, 20.1 mg, 67% yield, 93% ee, 10:1 dr.  $R_f = 0.46$  (*n*-hexane:EtOAc = 5:1).

$[\alpha]_D^{20} = +19.85$  (c 1.0, CHCl<sub>3</sub>).

**<sup>1</sup>H NMR** (400 MHz, CDCl<sub>3</sub>, ppm):  $\delta$  7.88 (d,  $J = 8.4$  Hz, 2H), 7.41 (t,  $J = 7.6$  Hz, 2H), 7.20 (t,  $J = 7.2$  Hz, 1H), 7.13 (t,  $J = 7.6$  Hz, 1H), 7.03 (d,  $J = 7.6$  Hz, 1H), 6.90 (d,  $J = 7.6$  Hz, 2H), 6.11-6.05 (m, 1H), 6.03-5.96 (m, 1H), 4.67 (s, 1H), 3.06-2.97 (m, 1H), 2.76-2.67 (m, 1H), 2.23 (s, 3H), 1.68 (s, 3H).

**<sup>13</sup>C NMR** (100 MHz, CDCl<sub>3</sub>, ppm):  $\delta$  176.9, 163.0, 159.0, 138.3, 138.2, 137.9, 131.5, 129.5, 129.0, 128.6, 128.4, 127.8, 125.2, 124.1, 119.2, 64.5, 59.9, 40.7, 21.5, 15.2.

**HPLC analysis:** Daicel CHIRALPAK AD-H, *n*-hexane:*i*-PrOH = 90:10, flow rate = 1.0 mL/min,  $\lambda = 254$  nm, retention time:  $t_{\text{minor}} = 10.3$  min,  $t_{\text{major}} = 14.5$  min.

**HRMS** (ESI) calcd for C<sub>21</sub>H<sub>21</sub>N<sub>2</sub>O [M + H]<sup>+</sup>: 317.1648, found 317.1650.

**(5R,6S)-4-methyl-2-phenyl-6-(m-tolyl)-2,3-diazaspiro[4.4]nona-3,7-dien-1-one**

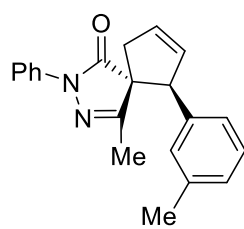

**(5R,6S)-4d**

Yellow oil, 21.5mg, 68% yield, 92% ee.

**HPLC analysis:** Daicel CHIRALPAK AD-H, *n*-hexane:*i*-PrOH = 90:10, flow rate = 1.0 mL/min,  $\lambda = 254$  nm, retention time:  $t_{\text{major}} = 10.3$  min,  $t_{\text{minor}} = 14.6$  min.

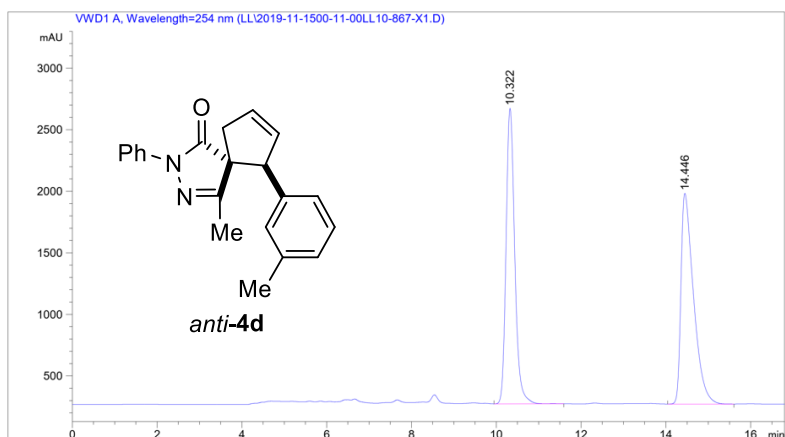

| Peak # | Ret. Time [min] | Type | Width [min] | Area [mAU*s] | Height [mAU] | Area %  |
|--------|-----------------|------|-------------|--------------|--------------|---------|
| 1      | 10.322          | BV R | 0.2187      | 3.41070e4    | 2399.59253   | 49.2412 |
| 2      | 14.446          | BB   | 0.3067      | 3.51582e4    | 1711.34888   | 50.7588 |

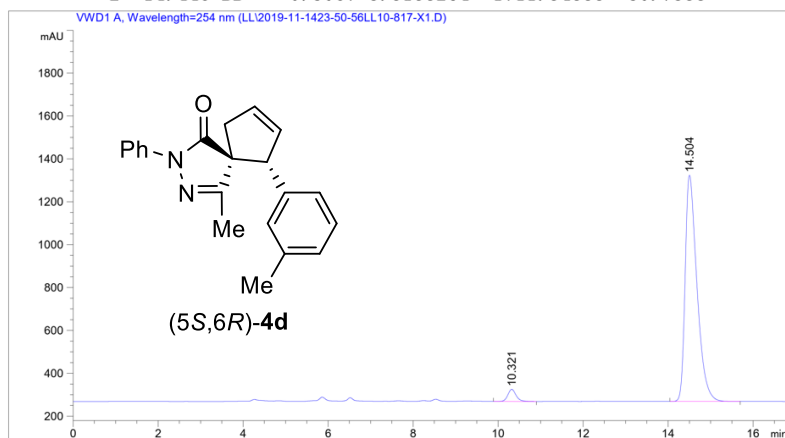

| Peak # | Ret. Time [min] | Type | Width [min] | Area [mAU*s] | Height [mAU] | Area %  |
|--------|-----------------|------|-------------|--------------|--------------|---------|
| 1      | 10.321          | BB   | 0.2054      | 756.91199    | 56.11644     | 3.5931  |
| 2      | 14.504          | BB   | 0.2926      | 2.03090e4    | 1055.07922   | 96.4069 |

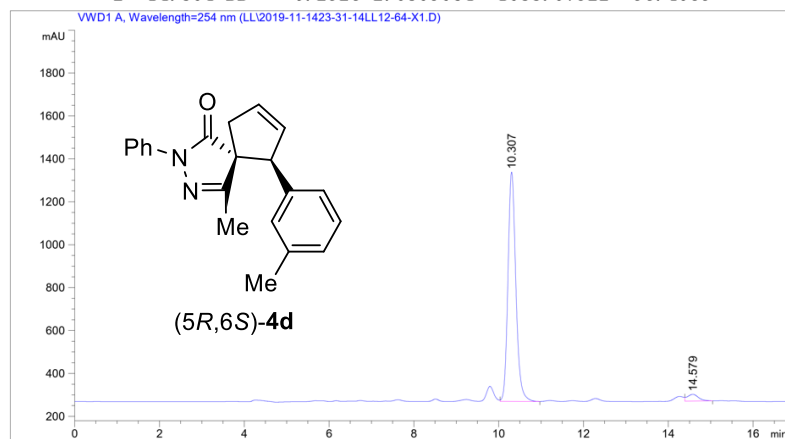

| Peak # | Ret. Time [min] | Type | Width [min] | Area [mAU*s] | Height [mAU] | Area %  |
|--------|-----------------|------|-------------|--------------|--------------|---------|
| 1      | 10.307          | VB   | 0.1987      | 1.38041e4    | 1068.85925   | 96.0067 |
| 2      | 14.579          | VBA  | 0.2699      | 574.16425    | 31.61188     | 3.9933  |

**(5S,6S)-4-methyl-2-phenyl-6-(m-tolyl)-2,3-diazaspiro[4.4]nona-3,7-dien-1-one**

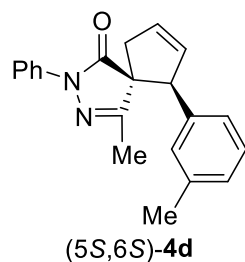

Yellow oil, 7.7 mg, 24% yield, 93% ee.  $R_f = 0.42$  (*n*-hexane:EtOAc = 5:1).  $[\alpha]_D^{20} = -19.13$  (*c* 1.0, CHCl<sub>3</sub>).

<sup>1</sup>H NMR (600 MHz, CDCl<sub>3</sub>, ppm):  $\delta$  7.45 (d, *J* = 7.8 Hz, 2H), 7.27-7.22 (m, 2H), 7.13 (t, *J* = 7.8 Hz, 1H), 7.06 (t, *J* = 7.2 Hz, 1H), 7.01 (d, *J* = 7.8 Hz, 1H), 6.94-6.89 (m, 2H), 6.10-6.06 (m, 1H), 5.90-5.86 (m, 1H), 4.29 (t, *J* = 1.8 Hz, 1H), 2.97-2.90 (m, 1H), 2.73-2.66 (m, 1H), 2.25 (s, 3H), 2.24 (s, 3H).

<sup>13</sup>C NMR (150 MHz, CDCl<sub>3</sub>, ppm):  $\delta$  174.0, 162.9, 137.9, 137.8, 137.2, 131.4, 130.8, 129.0, 128.7, 128.5, 128.2, 125.4, 124.8, 119.2, 62.9, 58.8, 39.4, 21.5, 13.8.

**HPLC analysis:** Daicel CHIRALPAK AD-H, *n*-hexane:*i*-PrOH = 80:20, flow rate = 1.0 mL/min,  $\lambda = 254$  nm, retention time:  $t_{\text{major}} = 6.7$  min,  $t_{\text{minor}} = 7.4$  min.

**HRMS (ESI)** calcd for C<sub>21</sub>H<sub>21</sub>N<sub>2</sub>O [M + H]<sup>+</sup>: 317.1648, found 317.1648.

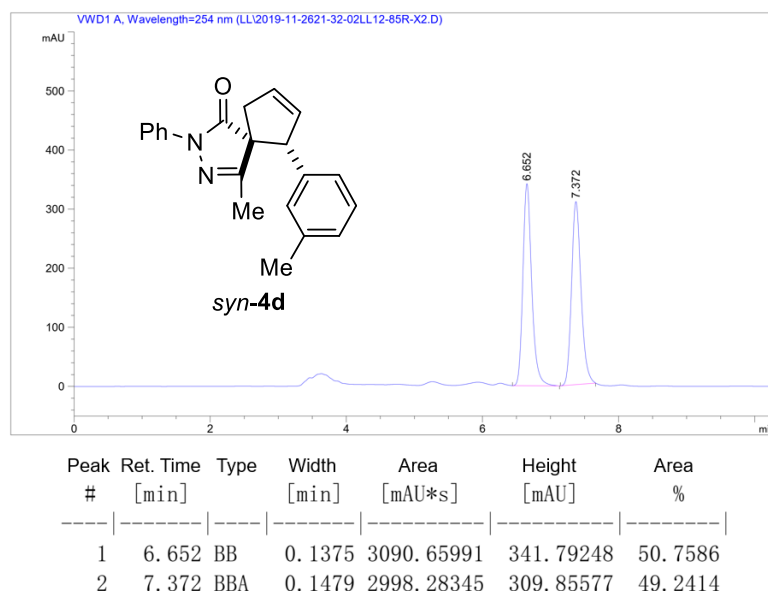

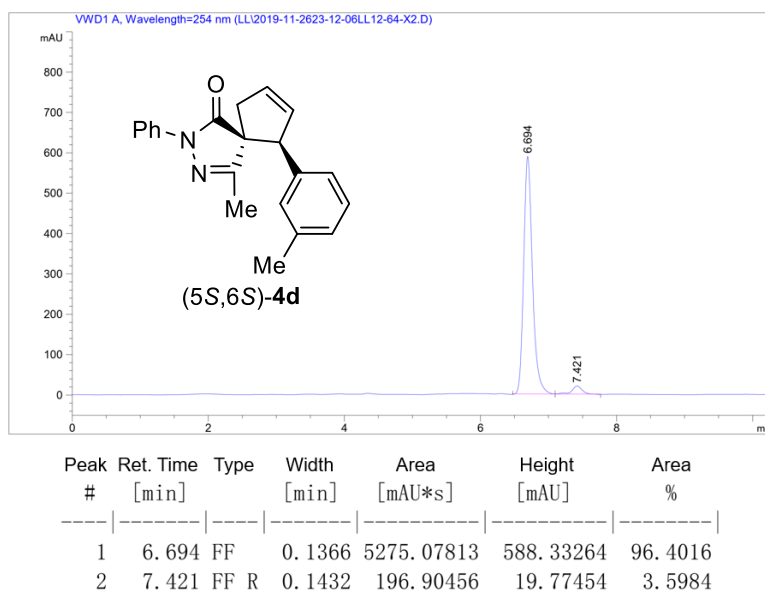

**(5S,6R)-6-(3,5-dimethoxyphenyl)-4-methyl-2-phenyl-2,3-diazaspiro[4.4]nona-3,7-dien-1-one**

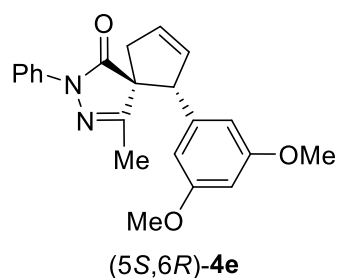

White solid, 22.1 mg, 61% yield, 93% ee, 10:1 dr.  $R_f = 0.35$  (*n*-hexane:EtOAc = 5:1).

$[\alpha]_D^{20} = +36.37$  (*c* 1.0, CHCl<sub>3</sub>).

<sup>1</sup>H NMR (400 MHz, CDCl<sub>3</sub>, ppm):  $\delta$  7.91 (d, *J* = 8.4 Hz, 2H), 7.39 (t, *J* = 7.6 Hz, 2H), 7.18 (t, *J* = 7.2 Hz, 1H), 6.30 (s, 1H), 6.23 (s, 2H), 6.08-6.01 (m, 1H), 6.01-5.96 (m, 1H), 4.64 (s, 1H), 3.59 (s, 6H), 3.06-2.97 (m, 1H), 2.74-2.65 (m, 1H), 1.74 (s, 3H).

<sup>13</sup>C NMR (100 MHz, CDCl<sub>3</sub>, ppm):  $\delta$  176.8, 163.0, 161.0, 140.4, 138.2, 131.2, 129.7, 129.0, 118.9, 104.9, 99.8, 64.5, 60.0, 55.3, 40.6, 15.3.

**HPLC analysis:** Daicel CHIRALPAK OD-H, *n*-hexane:*i*-PrOH = 90:10, flow rate = 1.0 mL/min,  $\lambda = 254$  nm, retention time:  $t_{\text{major}} = 7.6$  min,  $t_{\text{minor}} = 9.2$  min.

**HRMS** (ESI) calcd for C<sub>22</sub>H<sub>23</sub>N<sub>2</sub>O<sub>3</sub> [M + H]<sup>+</sup>: 363.1703, found 363.1703.

**(5R,6S)-6-(3,5-dimethoxyphenyl)-4-methyl-2-phenyl-2,3-diazaspiro[4.4]nona-3,7-dien-1-one**

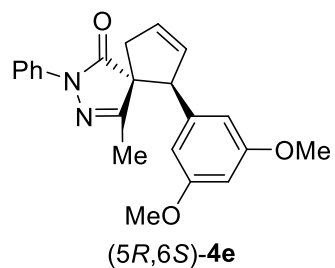

White solid, 19.2 mg, 53% yield, 90% ee. **HPLC analysis:** Daicel CHIRALPAK OD-H, *n*-hexane:*i*-PrOH = 90:10, flow rate = 1.0 mL/min,  $\lambda$  = 254 nm, retention time:  $t_{\text{minor}} = 7.6$  min,  $t_{\text{major}} = 9.1$  min.

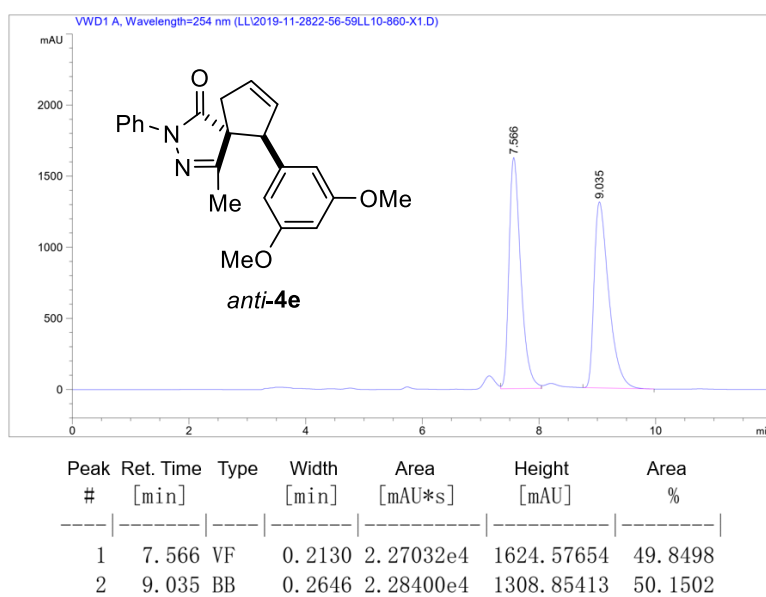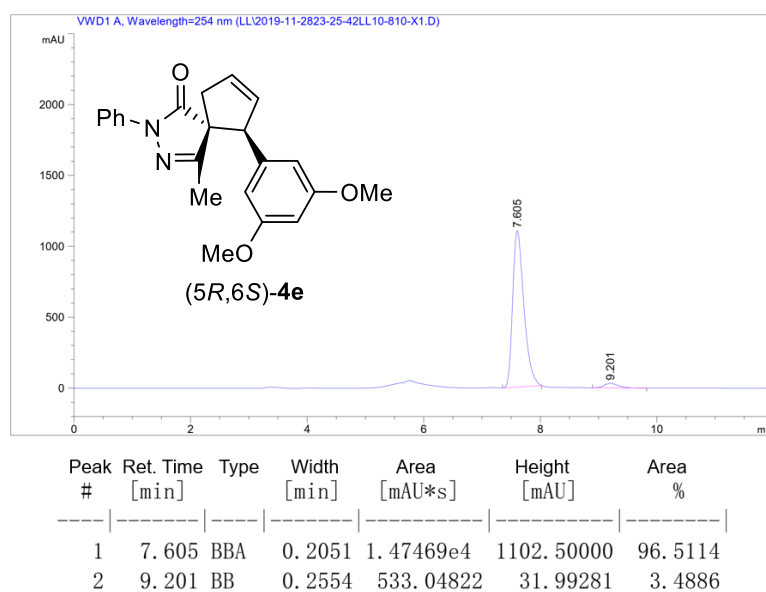

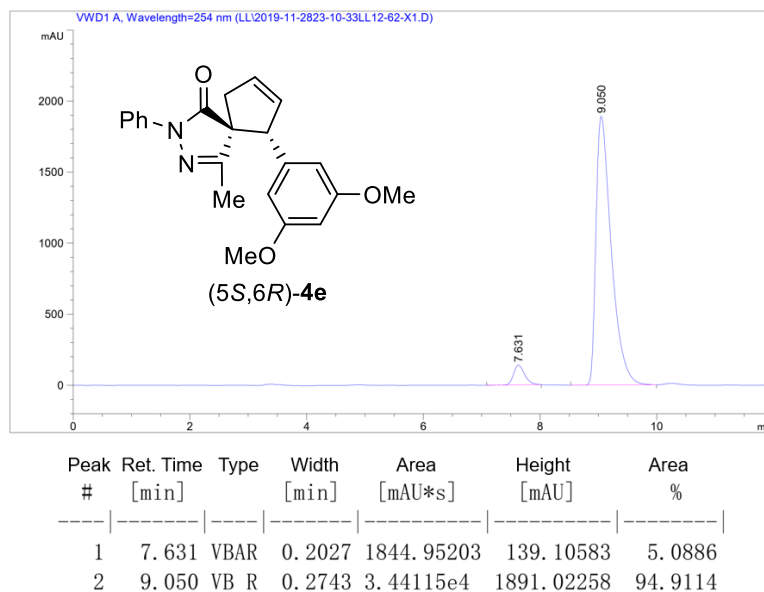

**(5S,6S)-6-(3,5-dimethoxyphenyl)-4-methyl-2-phenyl-2,3-diazaspiro[4.4]nona-3,7-dien-1-one**

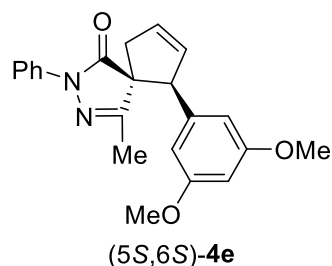

Yellow oil, 6.6 mg, 18% yield, 90% ee.  $R_f = 0.32$  (*n*-hexane:EtOAc = 5:1).  $[\alpha]_D^{20} = -10.21$  (*c* 1.0, CHCl<sub>3</sub>).

<sup>1</sup>H NMR (400 MHz, CDCl<sub>3</sub>, ppm):  $\delta$  7.54 (d, *J* = 7.8 Hz, 2H), 7.31-7.24 (m, 3H), 7.09 (t, *J* = 7.2 Hz, 1H), 6.31 (s, 1H), 6.27 (s, 1H), 6.11-6.07 (m, 1H), 5.89-5.86 (m, 1H), 4.25 (s, 1H), 3.67 (s, 6H), 2.94 (d, *J* = 17.4Hz, 1H), 2.69 (d, *J* = 17.4Hz, 1H), 2.23 (s, 3H).

<sup>13</sup>C NMR (100 MHz, CDCl<sub>3</sub>, ppm):  $\delta$  173.8, 162.8, 160.7, 139.7, 138.0, 131.1, 128.7, 124.8, 119.0, 106.5, 100.0, 62.8, 58.9, 55.4, 39.4, 13.8.

**HPLC analysis:** Daicel CHIRALPAK AD-H, *n*-hexane:*i*-PrOH = 80:20, flow rate = 1.0 mL/min,  $\lambda = 254$  nm, retention time:  $t_{\text{minor}} = 11.4$  min,  $t_{\text{major}} = 17.2$  min.

**HRMS** (ESI) calcd for C<sub>22</sub>H<sub>23</sub>N<sub>2</sub>O<sub>3</sub> [M + H]<sup>+</sup>: 363.1703, found 363.1704.

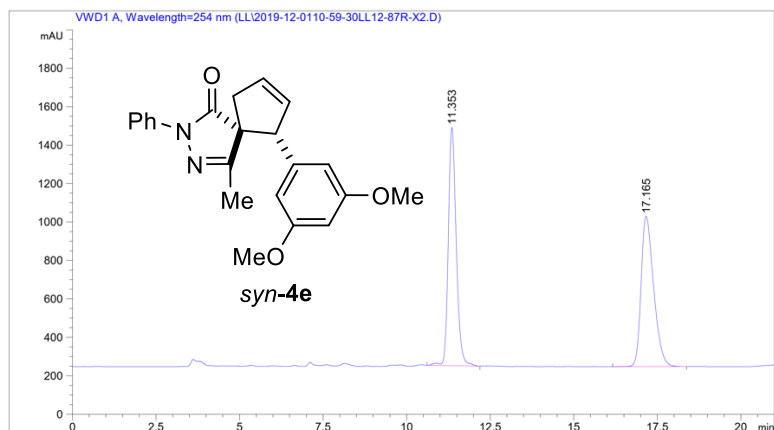

| Peak # | Ret. Time [min] | Type | Width [min] | Area [mAU*s] | Height [mAU] | Area %  |
|--------|-----------------|------|-------------|--------------|--------------|---------|
| 1      | 11.353          | VB R | 0.2505      | 2.03908e4    | 1238.80237   | 50.0209 |
| 2      | 17.165          | BB   | 0.3979      | 2.03737e4    | 782.01758    | 49.9791 |

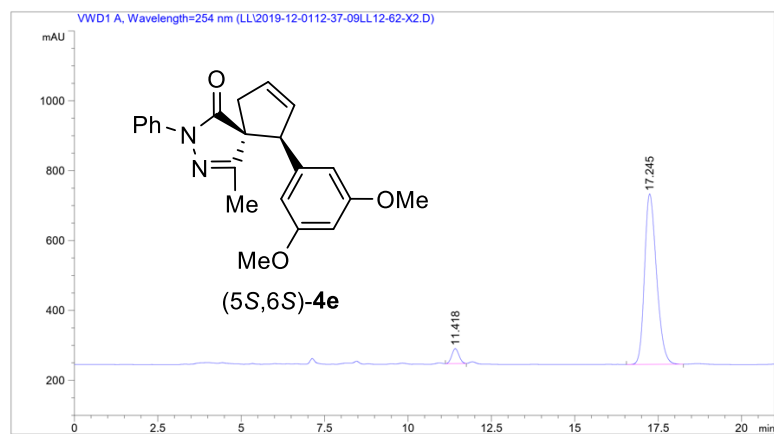

| Peak # | Ret. Time [min] | Type | Width [min] | Area [mAU*s] | Height [mAU] | Area %  |
|--------|-----------------|------|-------------|--------------|--------------|---------|
| 1      | 11.418          | BB   | 0.2317      | 635.02228    | 42.89882     | 4.9461  |
| 2      | 17.245          | BB   | 0.3819      | 1.22037e4    | 487.72076    | 95.0539 |



**(5*S*,6*R*)-6-(4-fluorophenyl)-4-methyl-2-phenyl-2,3-diazaspiro[4.4]nona-3,7-dien-1-one**

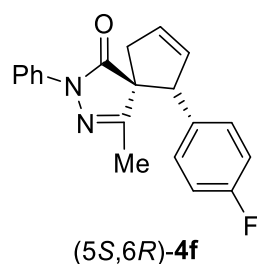

Yellow oil, 21.1 mg, 66% yield, 94% ee, 8:1 dr.  $R_f = 0.45$  (*n*-hexane:EtOAc = 5:1).

$[\alpha]_D^{20} = +24.74$  (*c* 1.0, CHCl<sub>3</sub>).

<sup>1</sup>H NMR (400 MHz, CDCl<sub>3</sub>, ppm):  $\delta$  7.89 (d, *J* = 8.0 Hz, 2H), 7.41 (t, *J* = 7.6 Hz, 2H), 7.20 (t, *J* = 7.6 Hz, 1H), 7.07 (t, *J* = 7.2 Hz, 2H), 6.94 (t, *J* = 8.4 Hz, 2H), 6.07-5.99 (m, 2H), 4.67 (s, 1H), 3.06-2.98 (m, 1H), 2.76-2.67 (m, 1H), 1.67 (s, 3H).

<sup>13</sup>C NMR (100 MHz, CDCl<sub>3</sub>, ppm):  $\delta$  176.6, 162.6, 162.3 (d, <sup>1</sup>*J*<sub>C-F</sub> = 244.7 Hz), 138.2, 133.8 (d, <sup>3</sup>*J*<sub>C-F</sub> = 3.2 Hz), 131.2, 130.0, 129.0, 128.6, 128.6, 125.2, 119.0, 115.7 (d, <sup>2</sup>*J*<sub>C-F</sub> = 21.3 Hz), 64.5, 59.2, 40.7, 15.2.

<sup>19</sup>F NMR (376 MHz, CDCl<sub>3</sub>, ppm):  $\delta$  -114.6 (s, 1F, CF).

**HPLC analysis:** Daicel CHIRALPAK OD-H, *n*-hexane:*i*-PrOH = 80:20, flow rate = 1.0 mL/min,  $\lambda = 254$  nm, retention time:  $t_{\text{major}} = 7.7$  min,  $t_{\text{minor}} = 7.6$  min.

**HRMS** (ESI) calcd for C<sub>20</sub>H<sub>18</sub>FN<sub>2</sub>O [M + H]<sup>+</sup>: 321.1398, found 321.1401.

**(5*R*,6*S*)-6-(4-fluorophenyl)-4-methyl-2-phenyl-2,3-diazaspiro[4.4]nona-3,7-dien-1-one**

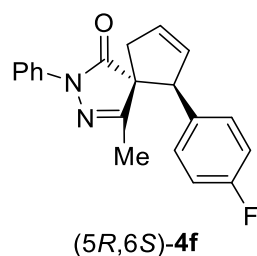

Yellow oil, 17.3 mg, 54% yield, 90% ee.

**HPLC analysis:** Daicel CHIRALPAK OD-H, *n*-hexane:*i*-PrOH = 90:10, flow rate = 1.0 mL/min,  $\lambda = 254$  nm, retention time:  $t_{\text{minor}} = 6.8$  min,  $t_{\text{major}} = 7.6$  min.

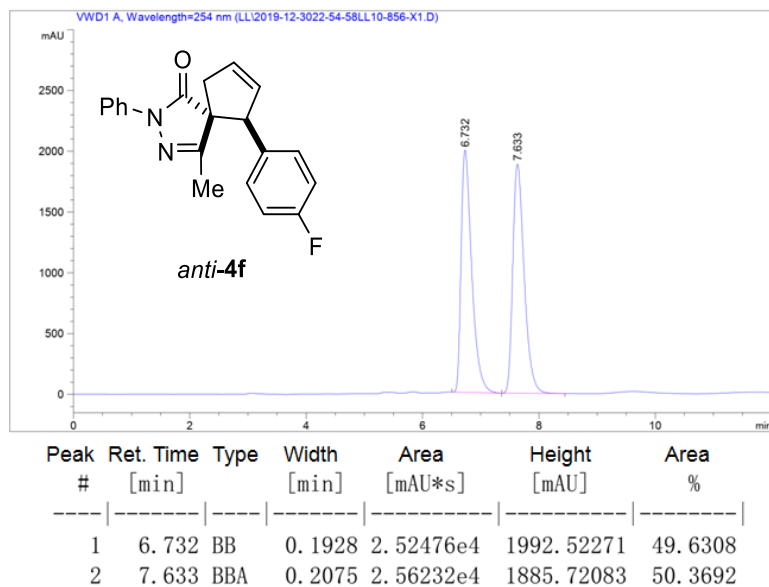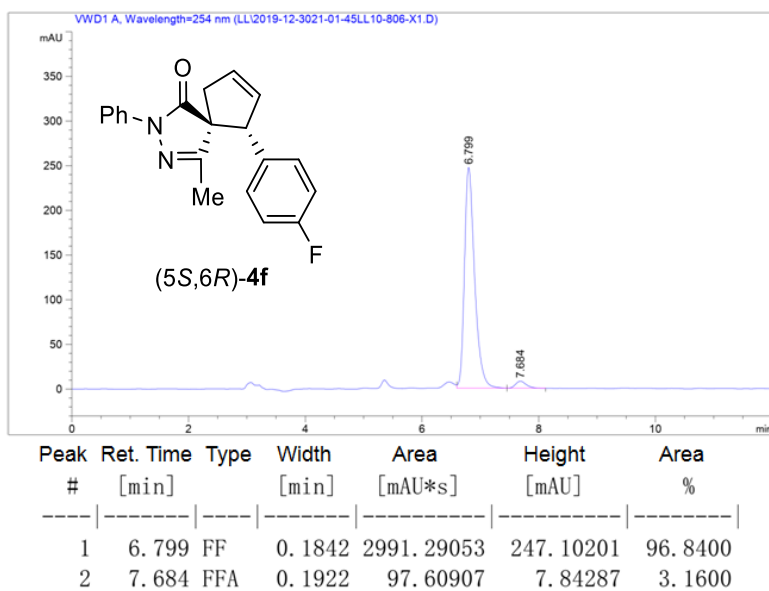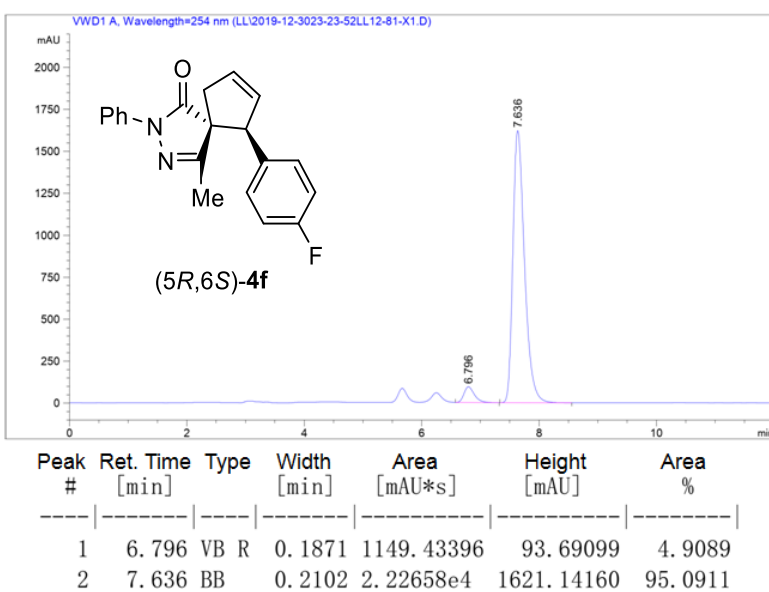

**(5S,6S)-6-(4-fluorophenyl)-4-methyl-2-phenyl-2,3-diazaspiro[4.4]nona-3,7-dien-1-one**

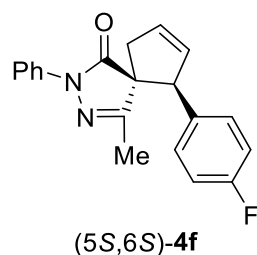

Yellow oil, 8.7 mg, 27% yield, 92% ee.  $R_f = 0.42$  (*n*-hexane:EtOAc = 5:1).  $[\alpha]_D^{20} = -11.51$  (*c* 1.0, CHCl<sub>3</sub>).

<sup>1</sup>H NMR (600 MHz, CDCl<sub>3</sub>, ppm):  $\delta$  7.48 (d, *J* = 7.8 Hz, 2H), 7.27 (t, *J* = 7.8 Hz, 2H), 7.11-7.06 (m, 3H), 6.97-6.91 (m, 2H), 6.12-6.08 (m, 1H), 5.87-5.84 (m, 1H), 4.30 (s, 1H), 2.98-2.92 (m, 1H), 2.74-2.68 (m, 1H), 2.25 (s, 3H), 2.25 (s, 3H).

<sup>13</sup>C NMR (150 MHz, CDCl<sub>3</sub>, ppm):  $\delta$  173.8, 162.8, 162.4 (d, <sup>1</sup>*J*<sub>C-F</sub> = 244.8 Hz), 137.8, 133.0 (d, <sup>3</sup>*J*<sub>C-F</sub> = 3.2 Hz), 131.2, 131.2, 130.0, 129.9, 128.8, 124.9, 119.0, 151.2 (d, <sup>2</sup>*J*<sub>C-F</sub> = 21.7 Hz), 62.8, 58.2, 39.4, 13.8.

<sup>19</sup>F NMR (565 MHz, CDCl<sub>3</sub>, ppm):  $\delta$  -114.7 (s, 1F, CF).

**HPLC analysis:** Daicel CHIRALPAK AD-H, *n*-hexane:*i*-PrOH = 80:20, flow rate = 1.0 mL/min,  $\lambda = 254$  nm, retention time:  $t_{\text{major}} = 6.1$  min,  $t_{\text{minor}} = 10.2$  min.

**HRMS (ESI)** calcd for C<sub>20</sub>H<sub>18</sub>FN<sub>2</sub>O [M + H]<sup>+</sup>: 321.1398, found 321.1395.

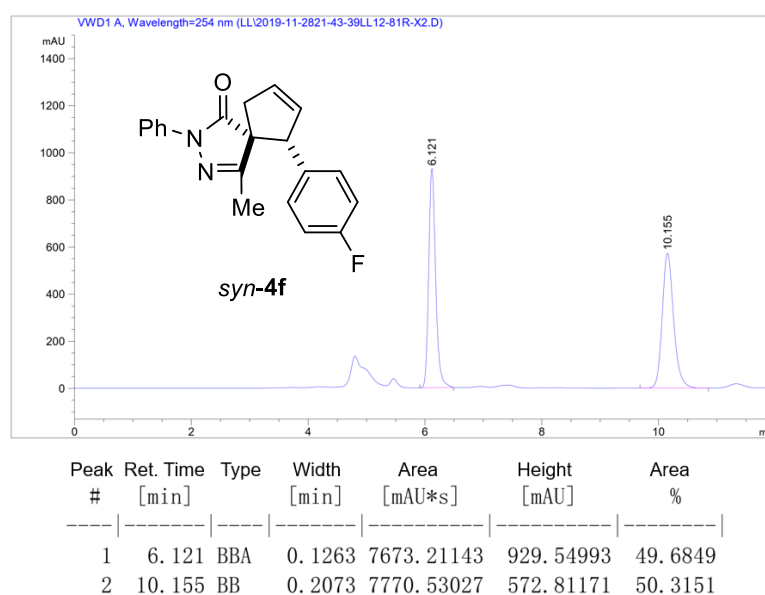

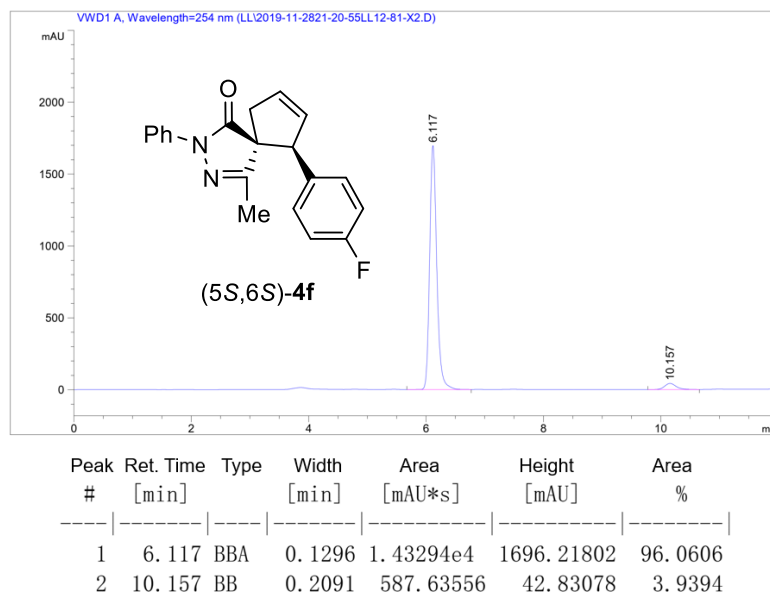

**(5S,6R)-6-(3-fluorophenyl)-4-methyl-2-phenyl-2,3-diazaspiro[4.4]nona-3,7-dien-1-one**

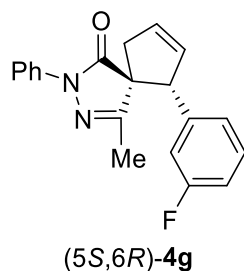

Yellow oil, 19.3 mg, 60% yield, 91% ee, 7:1 dr.  $R_f = 0.46$  (*n*-hexane:EtOAc = 5:1).

$[\alpha]_D^{20} = +25.62$  (*c* 1.0, CHCl<sub>3</sub>).

<sup>1</sup>H NMR (400 MHz, CDCl<sub>3</sub>, ppm):  $\delta$  7.89 (d, *J* = 8.0 Hz, 2H), 7.41 (t, *J* = 7.6 Hz, 2H), 7.25-7.17 (m, 2H), 6.97-6.90 (m, 1H), 6.85 (d, *J* = 8.4 Hz, 2H), 6.07-6.00 (m, 2H), 4.69 (s, 1H), 3.07-2.98 (m, 1H), 2.76-2.68 (m, 1H), 1.68 (s, 3H).

<sup>13</sup>C NMR (100 MHz, CDCl<sub>3</sub>, ppm):  $\delta$  176.5, 163.0 (d, <sup>1</sup>*J*<sub>C-F</sub> = 245.6 Hz), 162.4, 140.7 (d, <sup>3</sup>*J*<sub>C-F</sub> = 6.9 Hz), 138.1, 130.7, 130.4, 130.3, 130.3, 129.0, 125.3, 122.9, 119.1, 114.7 (d, <sup>2</sup>*J*<sub>C-F</sub> = 21.0 Hz), 114.0 (d, <sup>2</sup>*J*<sub>C-F</sub> = 22.2 Hz), 64.3, 59.3, 59.3, 40.9, 15.2.

<sup>19</sup>F NMR (376 MHz, CDCl<sub>3</sub>, ppm):  $\delta$  -112.3 (s, 1F, CF).

**HPLC analysis:** Daicel CHIRALPAK AD-H, *n*-hexane:*i*-PrOH = 90:10, flow rate = 1.0 mL/min,  $\lambda = 254$  nm, retention time:  $t_{\text{minor}} = 11.7$  min,  $t_{\text{major}} = 17.8$  min.

**HRMS** (ESI) calcd for C<sub>20</sub>H<sub>18</sub>FN<sub>2</sub>O [M + H]<sup>+</sup>: 321.1398, found 321.1400.

**(5*R*,6*S*)-6-(3-fluorophenyl)-4-methyl-2-phenyl-2,3-diazaspiro[4.4]nona-3,7-dien-1-one**  
**-one**

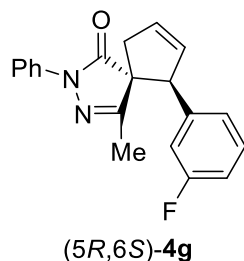

Yellow oil, 15.7 mg, 49% yield, 91% ee.

**HPLC analysis:** Daicel CHIRALPAK AD-H, *n*-hexane:*i*-PrOH = 90:10, flow rate = 1.0 mL/min,  $\lambda$  = 254 nm, retention time:  $t_{\text{major}}$  = 11.7 min,  $t_{\text{minor}}$  = 17.9 min.

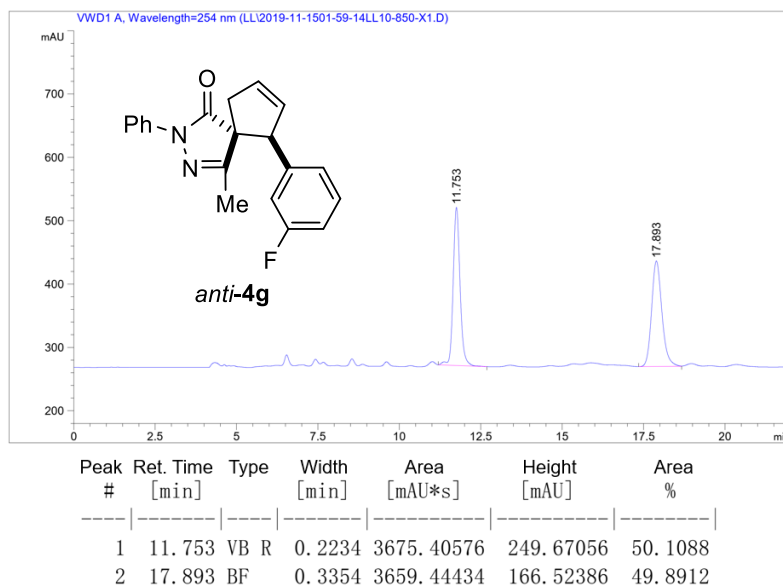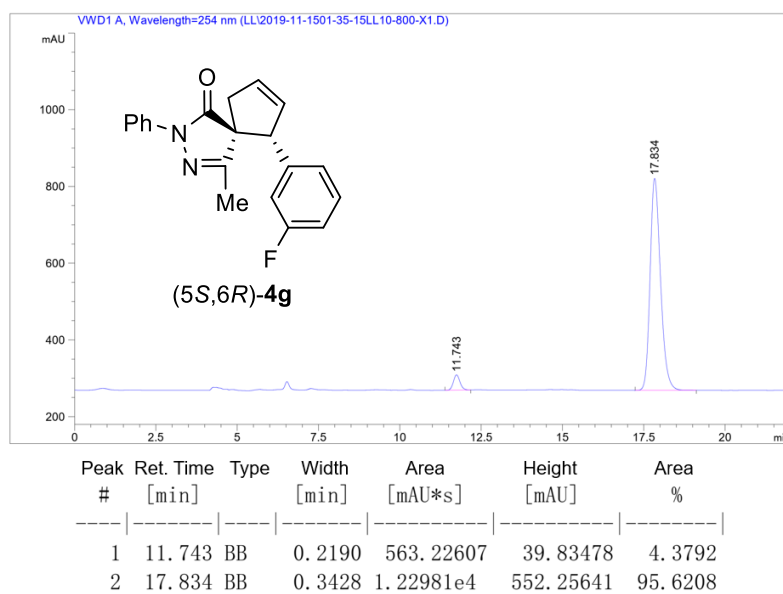

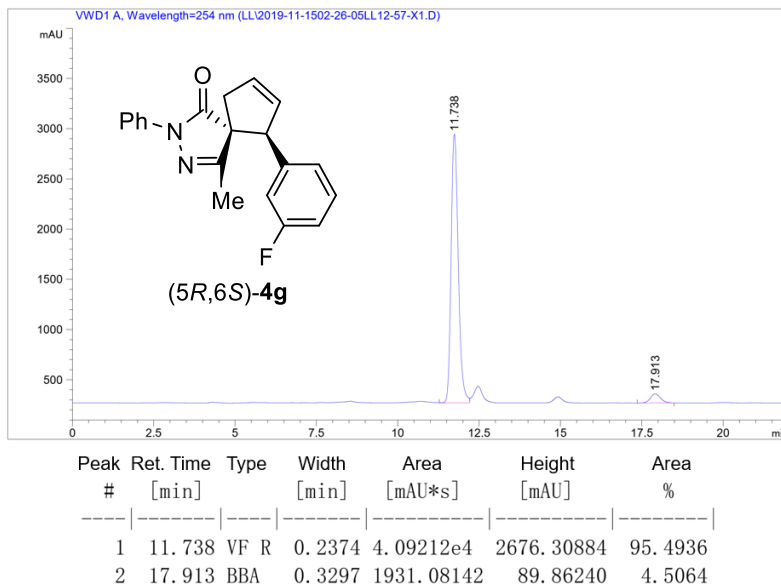

**(5S,6S)-6-(3-fluorophenyl)-4-methyl-2-phenyl-2,3-diazaspiro[4.4]nona-3,7-dien-1-one**

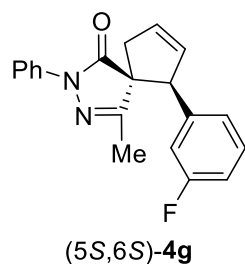

Yellow oil, 7.8mg, 24% yield, 93% ee.  $R_f = 0.42$  (*n*-hexane:EtOAc = 5:1).  $[\alpha]_D^{20} = -14.03$  (*c* 1.0, CHCl<sub>3</sub>).

<sup>1</sup>H NMR (600 MHz, CDCl<sub>3</sub>, ppm):  $\delta$  7.50 (d,  $J = 7.8$  Hz, 2H), 7.27 (t,  $J = 7.2$  Hz, 2H), 7.23-7.17 (m, 1H), 7.09 (t,  $J = 7.8$  Hz, 1H), 6.94-6.84 (m, 3H), 6.15-6.11 (m, 1H), 5.89-5.85 (m, 1H), 4.30 (t,  $J = 1.8$  Hz, 1H), 2.99-2.92 (m, 1H), 2.75-2.68 (m, 1H), 2.25 (s, 3H).

<sup>13</sup>C NMR (150 MHz, CDCl<sub>3</sub>, ppm):  $\delta$  173.6, 162.8 (d,  $^1J_{C-F} = 244.9$  Hz), 162.6, 139.9, 139.9 (d,  $^3J_{C-F} = 7.2$  Hz), 137.8, 131.6, 130.8, 129.7, 129.7, 128.8, 124.9, 124.1, 124.0, 119.1, 115.4 (d,  $^2J_{C-F} = 21.9$  Hz), 114.7 (d,  $^2J_{C-F} = 20.9$  Hz), 62.7, 58.3, 39.5, 13.8.

<sup>19</sup>F NMR (565 MHz, CDCl<sub>3</sub>, ppm):  $\delta$  -113.2 (s, 1F, CF).

**HPLC analysis:** Daicel CHIRALPAK AD-H, *n*-hexane:*i*-PrOH = 80:20, flow rate = 1.0 mL/min,  $\lambda = 254$  nm, retention time:  $t_{\text{major}} = 7.1$  min,  $t_{\text{minor}} = 8.1$  min.

HRMS (ESI) calcd for C<sub>20</sub>H<sub>18</sub>FN<sub>2</sub>O [M + H]<sup>+</sup>: 321.1398, found 321.1396.

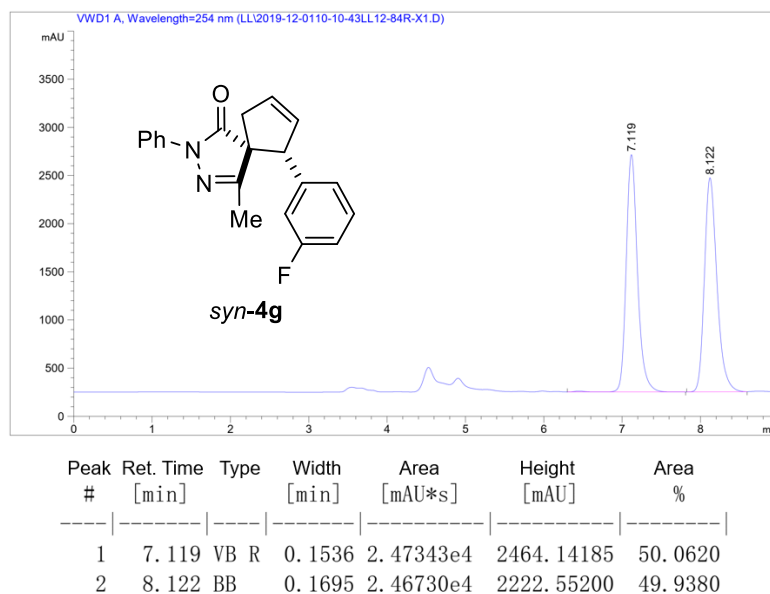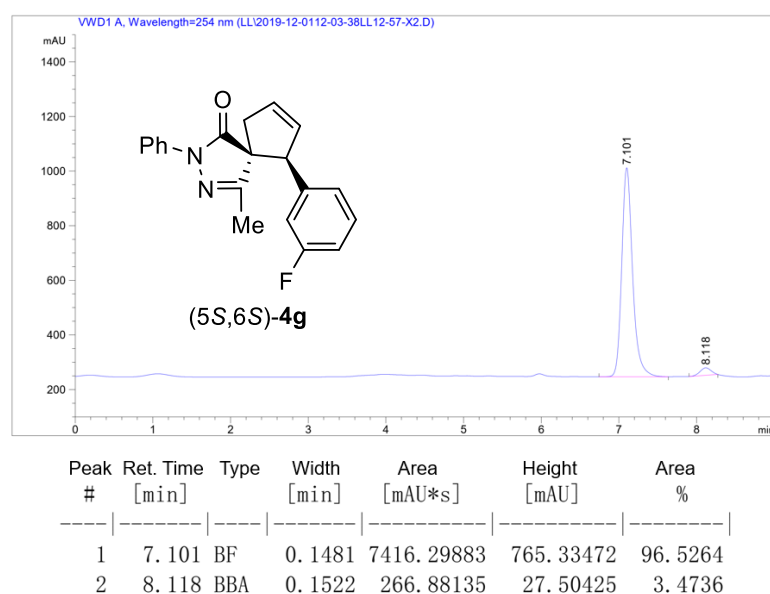

**(5S,6R)-6-(4-bromophenyl)-4-methyl-2-phenyl-2,3-diazaspiro[4.4]nona-3,7-dien-1-one**

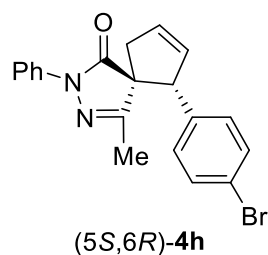

White solid, 27.2 mg, 71% yield, 91% ee, 8:1 dr.  $R_f = 0.44$  (*n*-hexane:EtOAc = 5:1).

$[\alpha]_D^{20} = +32.3750$  (*c* 1.0, CHCl<sub>3</sub>). <sup>1</sup>H NMR (400 MHz, CDCl<sub>3</sub>, ppm):  $\delta$  7.89 (d, *J* =

7.8 Hz, 2H), 7.41 (t,  $J = 7.6$  Hz, 2H), 7.37 (d,  $J = 8.4$  Hz, 2H), 7.20 (t,  $J = 7.4$  Hz, 2H), 6.97 (d,  $J = 8.4$  Hz, 2H), 6.08-5.98 (m, 2H), 4.70-4.60 (m, 1H), 3.10-2.97 (m, 1H), 2.78-2.66 (m, 1H), 1.68 (s, 3H).

$^{13}\text{C}$  NMR (100 MHz,  $\text{CDCl}_3$ , ppm):  $\delta$  176.5, 162.4, 138.1, 137.1, 131.9, 130.8, 130.2, 129.0, 128.7, 125.3, 121.6, 119.0, 64.4, 59.2, 40.8, 15.2.

**HPLC analysis:** Daicel CHIRALPAK AD-H, *n*-hexane:*i*-PrOH = 90:10, flow rate = 1.0 mL/min,  $\lambda = 254$  nm, retention time:  $t_{\text{minor}} = 9.5$  min,  $t_{\text{major}} = 11.0$  min.

**HRMS** (ESI) calcd for  $\text{C}_{20}\text{H}_{18}\text{BrN}_2\text{O}$  [ $\text{M} + \text{H}$ ] $^+$ : 381.0597, found 381.0599.

**(5*R*,6*S*)-6-(4-bromophenyl)-4-methyl-2-phenyl-2,3-diazaspiro[4.4]nona-3,7-dien-1-one**

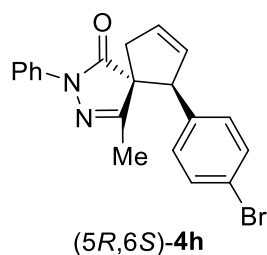

Yellow solid, 16.9 mg, 44% yield, 86% ee.

**HPLC analysis:** Daicel CHIRALPAK AD-H, *n*-hexane:*i*-PrOH = 90:10, flow rate = 1.0 mL/min,  $\lambda = 254$  nm, retention time:  $t_{\text{major}} = 9.5$  min,  $t_{\text{minor}} = 11.0$  min.

**HRMS** (ESI) calcd for  $\text{C}_{20}\text{H}_{18}\text{BrN}_2\text{O}$  [ $\text{M} + \text{H}$ ] $^+$ : 381.0597, found 381.0598.



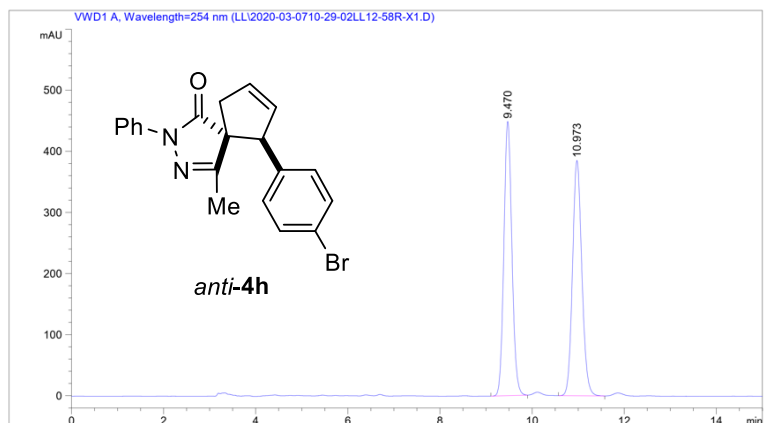

| Peak # | Ret. Time [min] | Type | Width [min] | Area [mAU*s] | Height [mAU] | Area %  |
|--------|-----------------|------|-------------|--------------|--------------|---------|
| 1      | 9.470           | BB   | 0.1876      | 5449.04736   | 448.93063    | 50.1503 |
| 2      | 10.973          | BB   | 0.2171      | 5416.38037   | 385.18298    | 49.8497 |

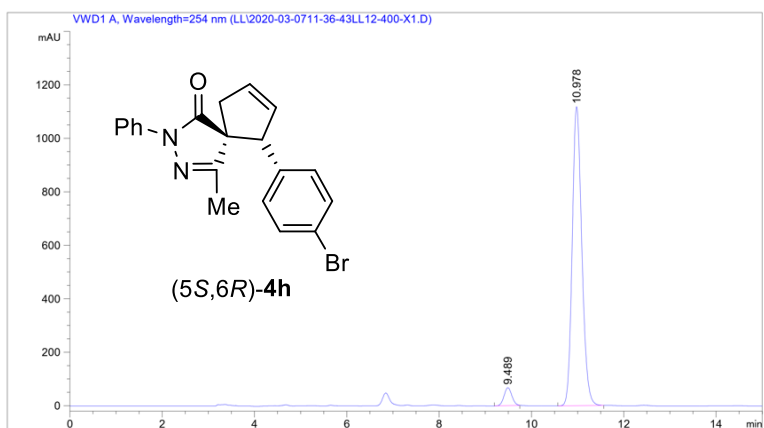

| Peak # | Ret. Time [min] | Type | Width [min] | Area [mAU*s] | Height [mAU] | Area %  |
|--------|-----------------|------|-------------|--------------|--------------|---------|
| 1      | 9.489           | BBA  | 0.1831      | 789.82263    | 67.22457     | 4.6729  |
| 2      | 10.978          | BB   | 0.2222      | 1.61125e4    | 1117.92102   | 95.3271 |

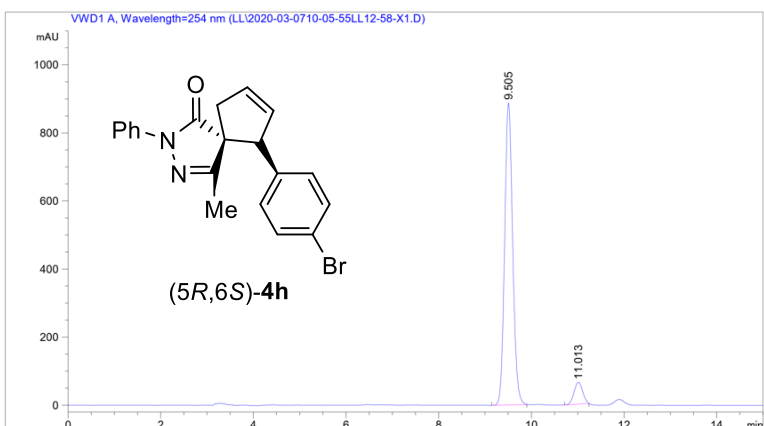

| Peak # | Ret. Time [min] | Type | Width [min] | Area [mAU*s] | Height [mAU] | Area %  |
|--------|-----------------|------|-------------|--------------|--------------|---------|
| 1      | 9.505           | BF   | 0.1864      | 1.06840e4    | 887.69507    | 92.8009 |
| 2      | 11.013          | BBA  | 0.2024      | 828.81818    | 64.27758     | 7.1991  |

**(5S,6S)-6-(4-bromophenyl)-4-methyl-2-phenyl-2,3-diazaspiro[4.4]nona-3,7-dien-1**

**-one**

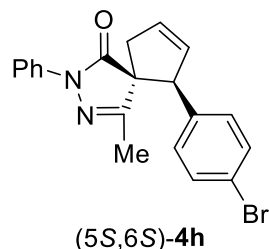

Yellow solid, 11.3 mg, 32% yield, 88% ee.  $R_f = 0.42$  (*n*-hexane:EtOAc = 5:1).  $[\alpha]_D^{20} = -29.7555$  (*c* 1.0, CHCl<sub>3</sub>).

<sup>1</sup>H NMR (400 MHz, CDCl<sub>3</sub>, ppm):  $\delta$  7.47 (d, *J* = 7.8 Hz, 2H), 7.37 (d, *J* = 8.4 Hz, 2H), 7.28 (t, *J* = 7.6 Hz, 2H), 7.09 (t, *J* = 7.4 Hz, 2H), 6.99 (d, *J* = 8.4 Hz, 2H), 6.16-6.09 (m, 1H), 5.88-5.80 (m, 1H), 4.30-4.23 (m, 1H), 2.78-2.66 (m, 1H), 2.24 (s, 3H).

<sup>13</sup>C NMR (100 MHz, CDCl<sub>3</sub>, ppm):  $\delta$  173.6, 162.6, 137.6, 136.2, 131.4, 130.8, 130.0, 128.7, 124.9, 121.7, 119.0, 62.5, 58.0, 39.4, 13.7.

**HPLC analysis:** Daicel CHIRALPAK AD-H, *n*-hexane:*i*-PrOH = 90:10, flow rate = 1.0 mL/min,  $\lambda = 254$  nm, retention time:  $t_{\text{major}} = 8.0$  min,  $t_{\text{minor}} = 16.3$  min.

**HRMS (ESI)** calcd for C<sub>20</sub>H<sub>18</sub>BrN<sub>2</sub>O [M + H]<sup>+</sup>: 381.0597, found 381.0597.

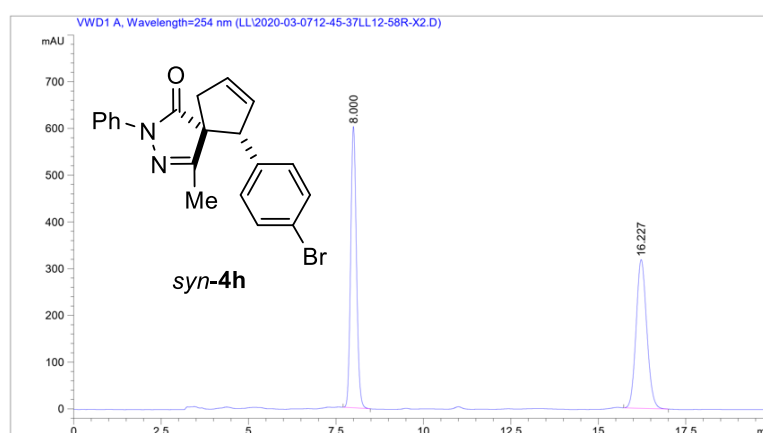

| Peak # | Ret. Time [min] | Type | Width [min] | Area [mAU*s] | Height [mAU] | Area %  |
|--------|-----------------|------|-------------|--------------|--------------|---------|
| 1      | 8.000           | BBA  | 0.1777      | 6895.62549   | 601.78424    | 50.5476 |
| 2      | 16.227          | BBA  | 0.3264      | 6746.22412   | 318.12531    | 49.4524 |

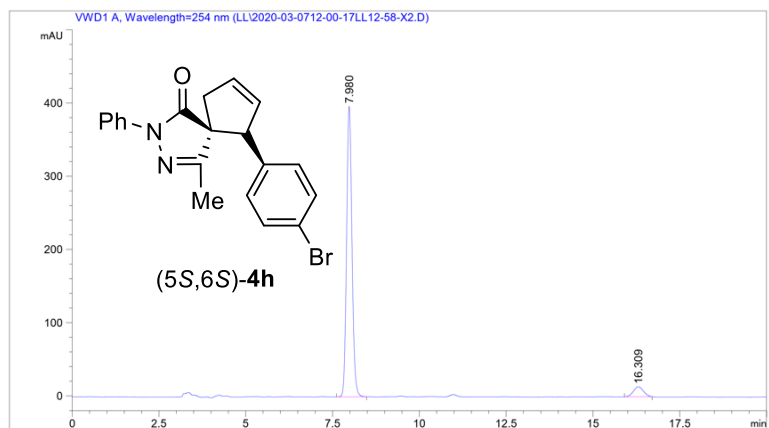

| Peak # | Ret. Time [min] | Type | Width [min] | Area [mAU*s] | Height [mAU] | Area %  |
|--------|-----------------|------|-------------|--------------|--------------|---------|
| 1      | 7.980           | BBA  | 0.1654      | 4259.99951   | 396.47430    | 93.9745 |
| 2      | 16.309          | BBAS | 0.3179      | 273.14420    | 13.51094     | 6.0255  |

**(5*S*,6*R*)-4-methyl-6-(naphthalen-2-yl)-2-phenyl-2,3-diazaspiro[4.4]nona-3,7-dien-1-one**

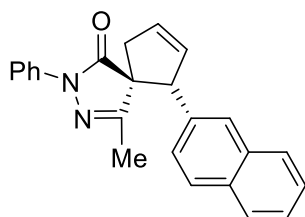

**(5*S*,6*R*)-4i**

Yellow oil, 24.0 mg, 68% yield, 94% ee, 8:1 dr.  $R_f = 0.37$  (*n*-hexane:EtOAc = 5:1).

$[\alpha]_D^{20} = +14.00$  (*c* 1.0, CHCl<sub>3</sub>).

<sup>1</sup>H NMR (400 MHz, CDCl<sub>3</sub>, ppm):  $\delta$  7.91 (d, *J* = 8.4 Hz, 2H), 7.81-6.8 (m, 3H), 7.62 (s, 1H), 7.48-7.39 (m, 4H), 7.21 (t, *J* = 7.2 Hz, 1H), 7.13 (d, *J* = 8.4 Hz, 1H), 6.23 (s, 1H), 6.08 (s, 1H), 4.88 (s, 1H), 3.09 (d, *J* = 16.8 Hz, 1H), 2.77 (d, *J* = 16.8 Hz, 1H), 1.64 (s, 3H).

<sup>13</sup>C NMR (100 MHz, CDCl<sub>3</sub>, ppm):  $\delta$  176.9, 162.8, 138.2, 135.7, 133.3, 132.9, 131.4, 129.8, 128.6, 127.9, 126.4, 125.5, 119.1, 64.4, 60.0, 41.0, 15.2.

**HPLC analysis:** Daicel CHIRALPAK AD-H, *n*-hexane:*i*-PrOH = 80:20, flow rate = 1.0 mL/min,  $\lambda = 254$  nm, retention time:  $t_{\text{minor}} = 9.5$  min,  $t_{\text{major}} = 15.6$  min.

**HRMS (ESI)** calcd for C<sub>24</sub>H<sub>21</sub>N<sub>2</sub>O [M + H]<sup>+</sup>: 353.1648, found 353.1651.

**(5*R*,6*S*)-4-methyl-6-(naphthalen-2-yl)-2-phenyl-2,3-diazaspiro[4.4]nona-3,7-dien-1-one**

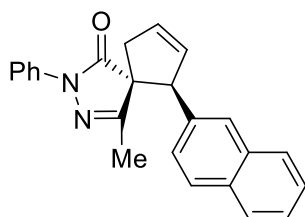

**(5*R*,6*S*)-4i**

Yellow oil, 23.0 mg, 65% yield, 92% ee.

**HPLC analysis:** Daicel CHIRALPAK AD-H, *n*-hexane:*i*-PrOH = 80:20, flow rate = 1.0 mL/min,  $\lambda = 254$  nm, retention time:  $t_{\text{major}} = 9.5$  min,  $t_{\text{minor}} = 15.7$  min.

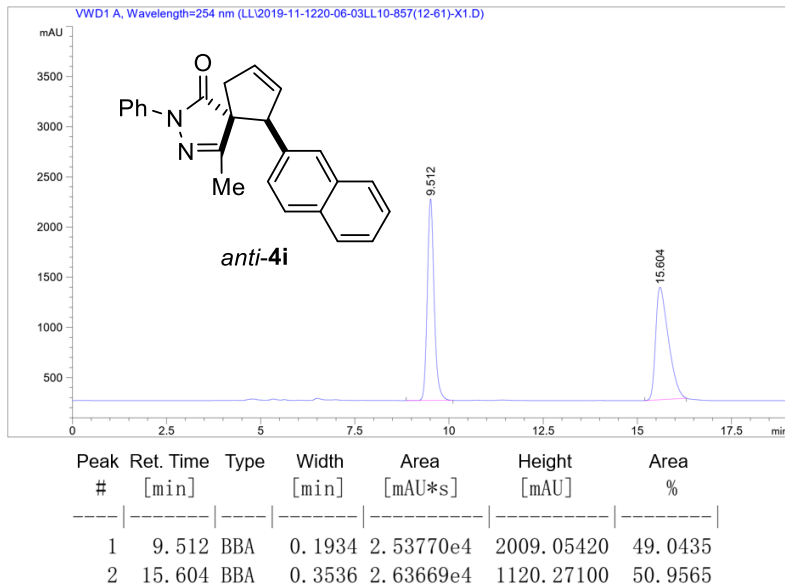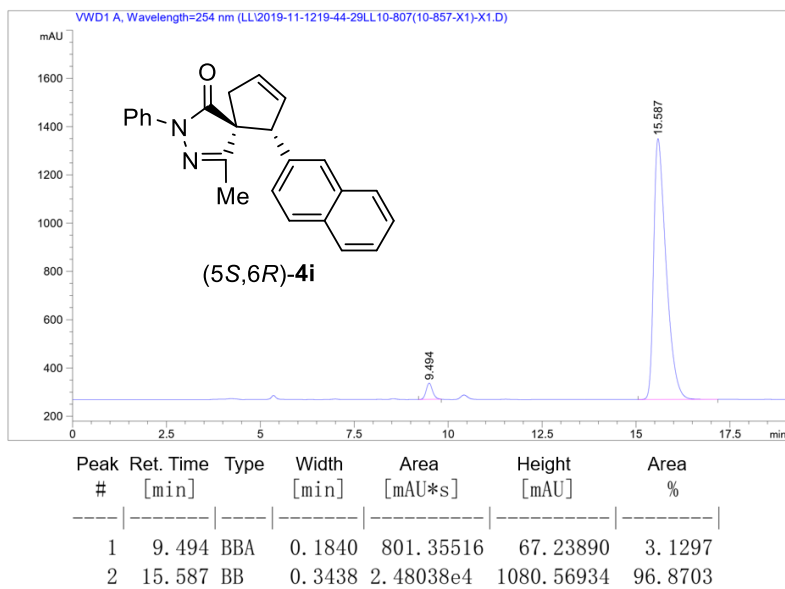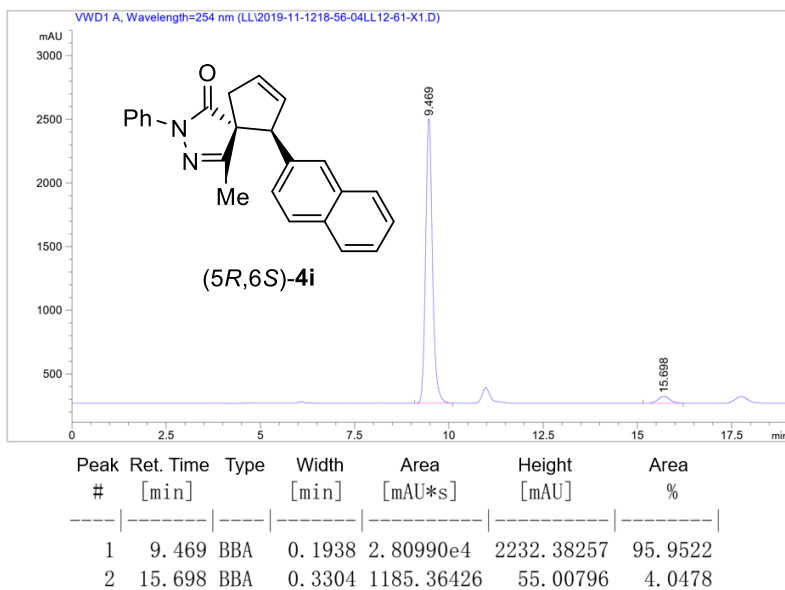

**(5*S*,6*S*)-4-methyl-6-(naphthalen-2-yl)-2-phenyl-2,3-diazaspiro[4.4]nona-3,7-dien-1-one**

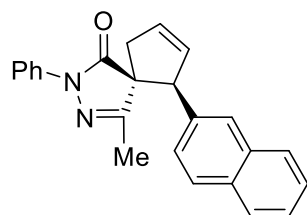

**(5*S*,6*S*)-4*i***

Yellow oil, 7.7 mg, 22% yield, 93% ee.  $R_f = 0.35$  (*n*-hexane:EtOAc = 5:1).  $[\alpha]_D^{20} = -8.69$  (*c* 1.0, CHCl<sub>3</sub>).

<sup>1</sup>H NMR (600 MHz, CDCl<sub>3</sub>, ppm):  $\delta$  7.79-7.74 (m, 2H), 7.73 (d, *J* = 8.4 Hz, 1H), 7.62 (s, 1H), 7.45-7.38 (m, 4H), 7.25-7.21 (m, 1H), 7.18 (t, *J* = 8.4 Hz, 2H), 7.02 (t, *J* = 7.2 Hz, 1H), 6.39-6.15 (m, 1H), 6.01-5.97 (m, 1H), 4.49 (s, 1H), 3.05-3.00 (m, 1H), 2.79-2.73 (m, 1H), 2.30 (s, 3H).

<sup>13</sup>C NMR (150 MHz, CDCl<sub>3</sub>, ppm):  $\delta$  173.8, 163.0, 137.8, 134.9, 133.3, 133.0, 131.5, 131.0, 128.7, 128.1, 127.9, 127.7, 127.2, 126.6, 125.9, 124.7, 119.1, 62.8, 59.0, 39.7, 13.8.

**HPLC analysis:** Daicel CHIRALPAK AD-H, *n*-hexane:*i*-PrOH = 80:20, flow rate = 1.0 mL/min,  $\lambda = 254$  nm, retention time:  $t_{\text{major}} = 7.2$  min,  $t_{\text{minor}} = 12.4$  min.

**HRMS (ESI)** calcd for C<sub>24</sub>H<sub>21</sub>N<sub>2</sub>O [M + H]<sup>+</sup>: 353.1648, found 353.1647.

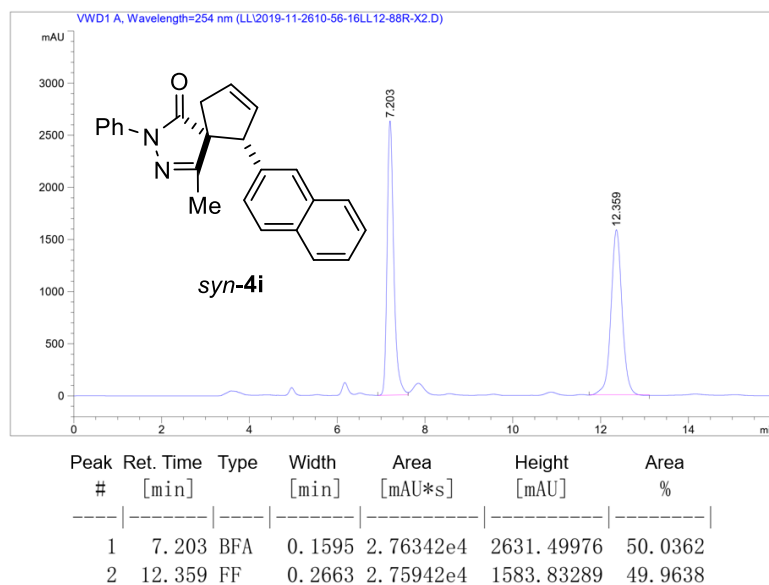

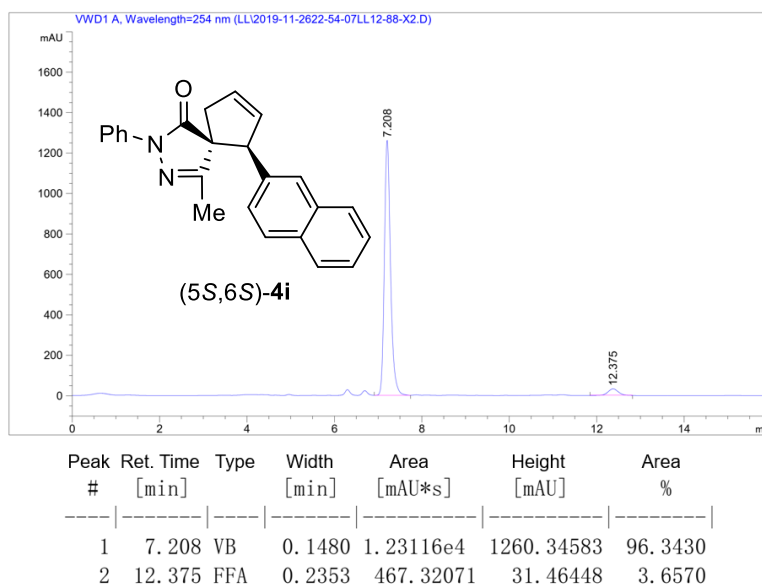

**(5S,6R)-6-(4-methoxyphenyl)-4-methyl-2-(p-tolyl)-2,3-diazaspiro[4.4]nona-3,7-dien-1-one**

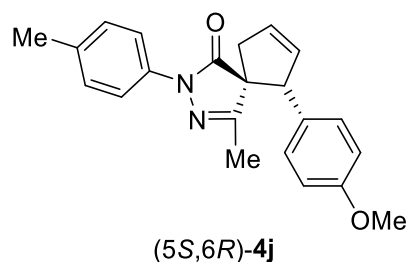

Yellow oil, 20.4 mg, 60% yield, 90% ee, 12:1 dr.  $R_f = 0.44$  (*n*-hexane:EtOAc = 5:1).

$[\alpha]_D^{20} = +24.74$  (*c* 1.0, CHCl<sub>3</sub>).

<sup>1</sup>H NMR (400 MHz, CDCl<sub>3</sub>, ppm):  $\delta$  7.77 (d, *J* = 8.4 Hz, 2H), 7.21 (d, *J* = 8.4 Hz, 2H), 7.01 (d, *J* = 8.4 Hz, 2H), 6.77 (d, *J* = 8.4 Hz, 2H), 6.08-6.02 (m, 1H), 6.01-5.95 (m, 1H), 4.65 (s, 1H), 3.09 (s, 3H), 3.04-2.95 (m, 1H), 2.74-2.66 (m, 1H), 2.36 (s, 3H), 1.67 (s, 3H).

<sup>13</sup>C NMR (100 MHz, CDCl<sub>3</sub>, ppm):  $\delta$  176.7, 162.9, 159.0, 135.9, 134.7, 131.7, 130.1, 129.5, 129.4, 28.1, 119.1, 114.0, 64.5, 59.3, 55.3, 40.6, 21.1, 15.2.

**HPLC analysis:** Daicel CHIRALPAK AD-H, *n*-hexane:*i*-PrOH = 80:20, flow rate = 1.0 mL/min,  $\lambda = 254$  nm, retention time:  $t_{\text{minor}} = 12.1$  min,  $t_{\text{major}} = 20.7$  min.

**HRMS (ESI)** calcd for C<sub>22</sub>H<sub>23</sub>N<sub>2</sub>O<sub>2</sub> [M + H]<sup>+</sup>: 347.1754, found 347.1756.

**(5R,6S)-6-(4-methoxyphenyl)-4-methyl-2-(p-tolyl)-2,3-diazaspiro[4.4]nona-3,7-dien-1-one**

### en-1-one

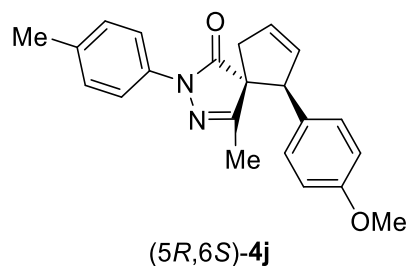

Yellow oil, 18.7 mg, 54% yield, 86% ee.

**HPLC analysis:** Daicel CHIRALPAK AD-H, *n*-hexane:*i*-PrOH = 80:20, flow rate = 1.0 mL/min,  $\lambda = 254$  nm, retention time:  $t_{\text{major}} = 12.2$  min,  $t_{\text{minor}} = 20.9$  min.

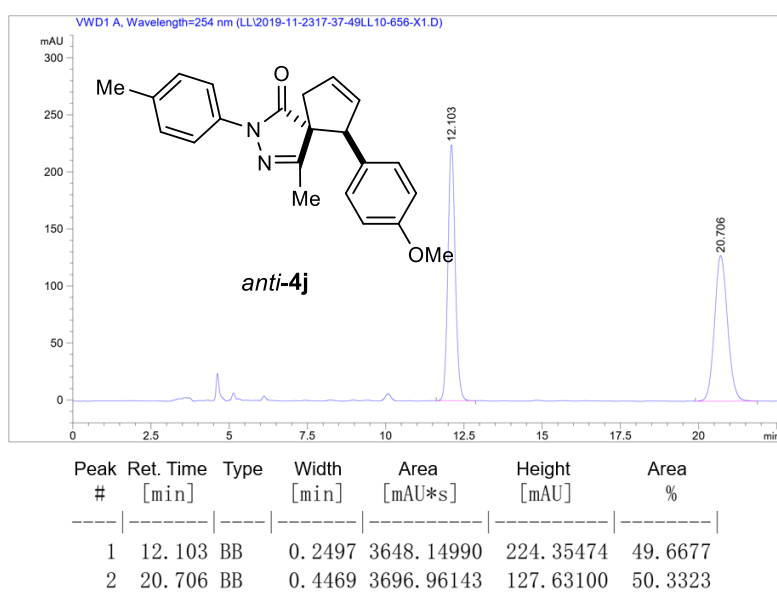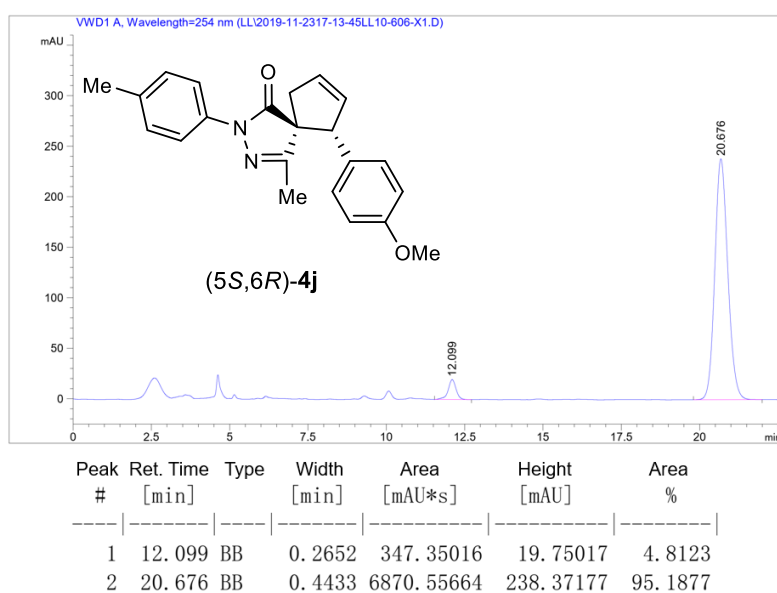



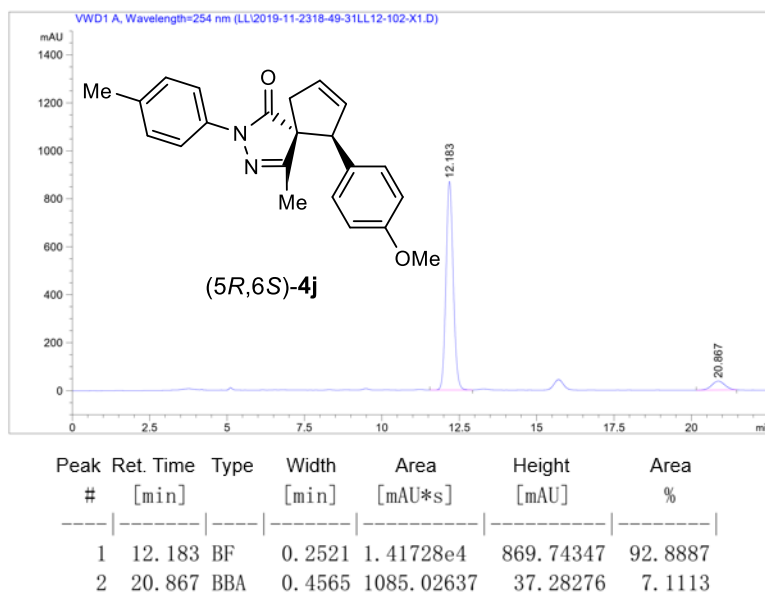

**(5S,6S)-6-(4-methoxyphenyl)-4-methyl-2-(p-tolyl)-2,3-diazaspiro[4.4]nona-3,7-dien-1-one**

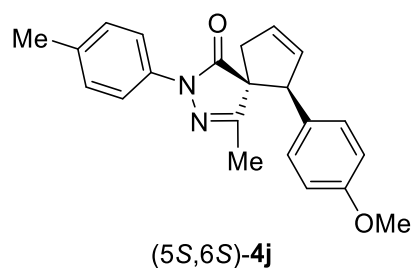

Yellow oil, 8.9 mg, 26% yield, 93% ee.  $R_f = 0.42$  (*n*-hexane:EtOAc = 5:1).  $[\alpha]_D^{20} = -13.19$  (*c* 1.0, CHCl<sub>3</sub>).

<sup>1</sup>H NMR (600 MHz, CDCl<sub>3</sub>, ppm):  $\delta$  7.34 (d, *J* = 8.4 Hz, 2H), 7.08-7.02 (m, 4H), 6.78 (d, *J* = 9.0 Hz, 2H), 6.08-6.04 (m, 1H), 5.87-5.83 (m, 1H), 4.28 (s, 1H), 3.74 (s, 3H), 2.97-2.90 (m, 1H), 2.72-2.66 (m, 1H), 2.28 (s, 3H), 2.23 (s, 3H).

<sup>13</sup>C NMR (150 MHz, CDCl<sub>3</sub>, ppm):  $\delta$  173.9, 162.8, 159.1, 135.5, 134.4, 131.7, 130.6, 129.4, 129.3, 129.2, 119.2, 113.7, 62.9, 58.3, 55.3, 39.3, 21.0, 13.8.

**HPLC analysis:** Daicel CHIRALPAK AD-H, *n*-hexane:*i*-PrOH = 80:20, flow rate = 1.0 mL/min,  $\lambda = 254$  nm, retention time:  $t_{\text{major}} = 12.9$  min,  $t_{\text{minor}} = 20.5$  min.

**HRMS (ESI)** calcd for C<sub>22</sub>H<sub>23</sub>N<sub>2</sub>O<sub>2</sub> [M + H]<sup>+</sup>: 347.1754, found 347.1756.

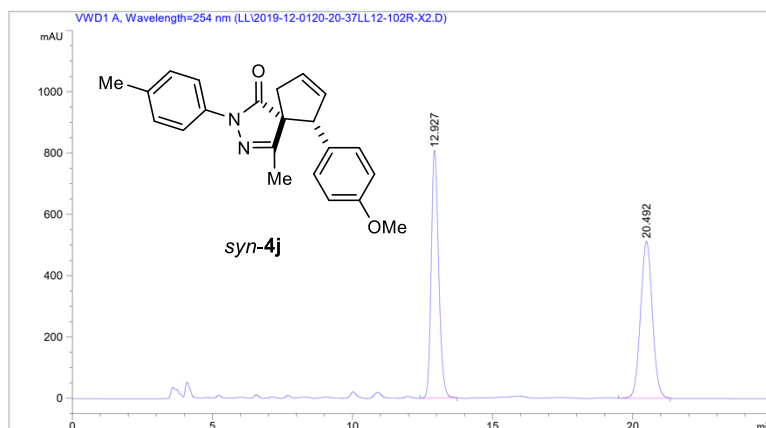

| Peak # | Ret. Time [min] | Type | Width [min] | Area [mAU*s] | Height [mAU] | Area %  |
|--------|-----------------|------|-------------|--------------|--------------|---------|
| 1      | 12.927          | VBAS | 0.2842      | 1.49058e4    | 808.03247    | 49.8482 |
| 2      | 20.492          | VBAS | 0.4568      | 1.49966e4    | 511.90067    | 50.1518 |

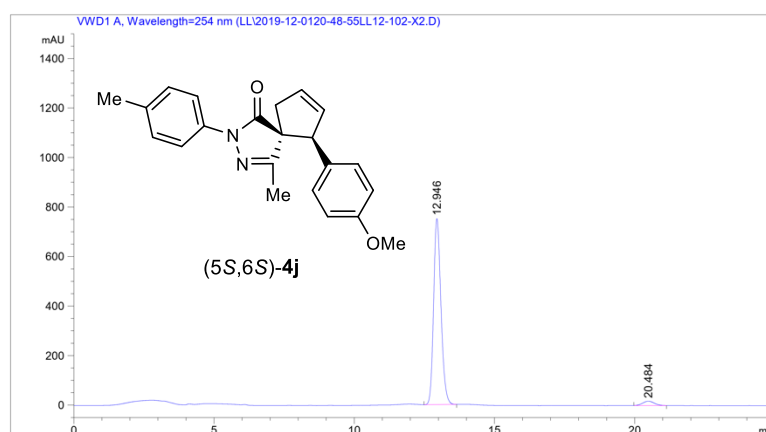

| Peak # | Ret. Time [min] | Type | Width [min] | Area [mAU*s] | Height [mAU] | Area %  |
|--------|-----------------|------|-------------|--------------|--------------|---------|
| 1      | 12.946          | BBA  | 0.2815      | 1.36852e4    | 751.21710    | 96.4446 |
| 2      | 20.484          | VBAS | 0.4481      | 504.50131    | 17.56474     | 3.5554  |

**(5S,6R)-2,6-bis(4-methoxyphenyl)-4-methyl-2,3-diazaspiro[4.4]nona-3,7-dien-1-one**

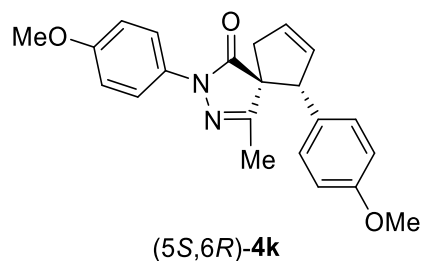

Yellow solid, 30.7 mg, 85% yield, 91% ee, 10:1 dr.  $R_f = 0.36$  (*n*-hexane:EtOAc = 5:1).  $[\alpha]_D^{20} = +28.50$  (*c* 1.0, CHCl<sub>3</sub>). <sup>1</sup>H NMR (400 MHz, CDCl<sub>3</sub>, ppm):  $\delta$  7.78 (d, *J* = 8.8 Hz, 2H), 7.01 (d, *J* = 8.4 Hz, 2H), 6.93 (d, *J* = 9.2 Hz, 2H), 6.77 (d, *J* = 8.4 Hz, 2H),

6.07-6.02 (m, 1H), 6.01-5.95 (m, 1H), 4.65 (s, 1H), 3.82 (s, 3H), 3.76 (s, 3H), 3.03-2.95 (m, 1H), 2.74-2.65 (m, 1H), 1.66 (s, 3H).

$^{13}\text{C}$  NMR (100 MHz,  $\text{CDCl}_3$ , ppm):  $\delta$  176.5, 162.9, 159.0, 157.1, 131.7, 130.1, 129.5, 128.1, 120.8, 114.1, 114.0, 64.4, 59.3, 55.6, 55.3, 40.5, 15.2.

**HPLC analysis:** Daicel CHIRALPAK AD-H, *n*-hexane:*i*-PrOH = 80:20, flow rate = 1.0 mL/min,  $\lambda$  = 254 nm, retention time:  $t_{\text{minor}}$  = 16.1 min,  $t_{\text{major}}$  = 30.1 min.

**HRMS** (ESI) calcd for  $\text{C}_{22}\text{H}_{23}\text{N}_2\text{O}_3$  [ $\text{M} + \text{H}$ ] $^+$ : 363.1703, found 363.1706.

**(5*R*,6*S*)-2,6-bis(4-methoxyphenyl)-4-methyl-2,3-diazaspiro[4.4]nona-3,7-dien-1-one**

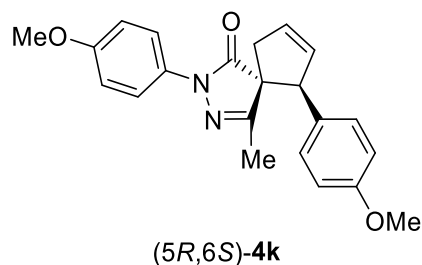

Yellow solid, 20.4 mg, 56% yield, 94% ee.

**HPLC analysis:** Daicel CHIRALPAK AD-H, *n*-hexane:*i*-PrOH = 80:20, flow rate = 1.0 mL/min,  $\lambda$  = 254 nm, retention time:  $t_{\text{major}}$  = 16.3 min,  $t_{\text{minor}}$  = 30.5 min.

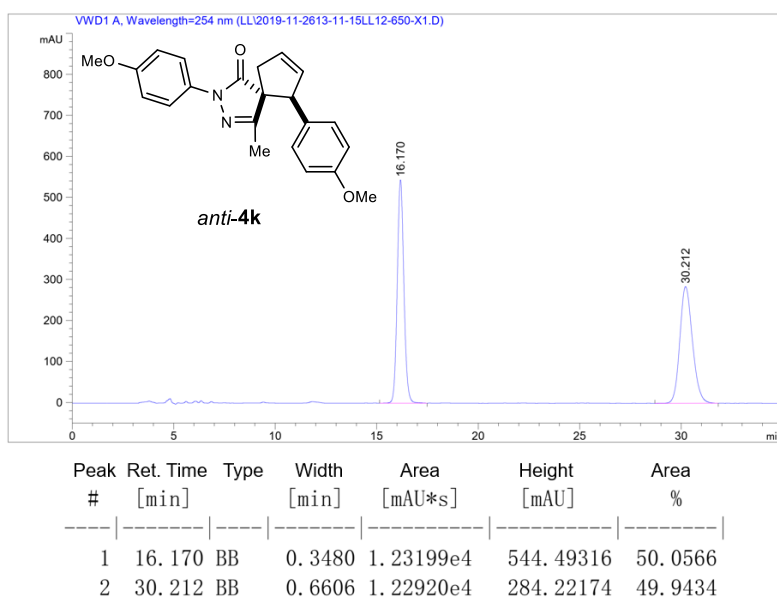

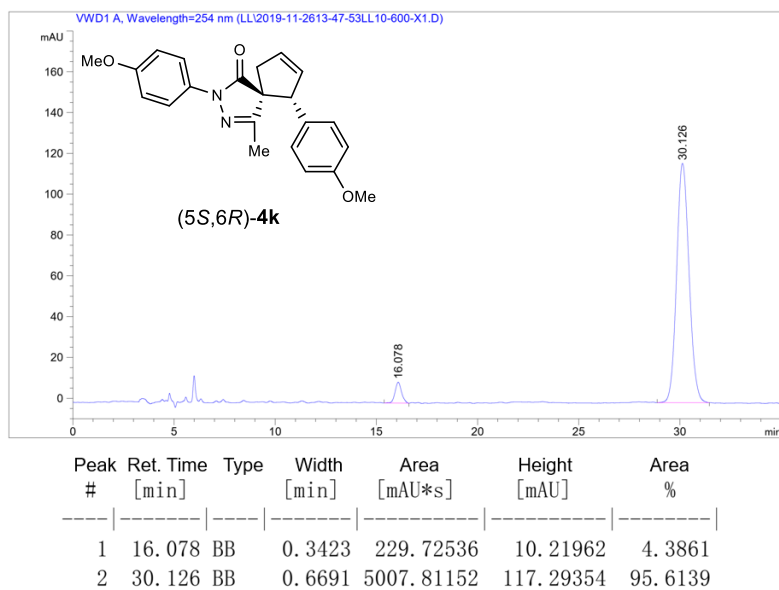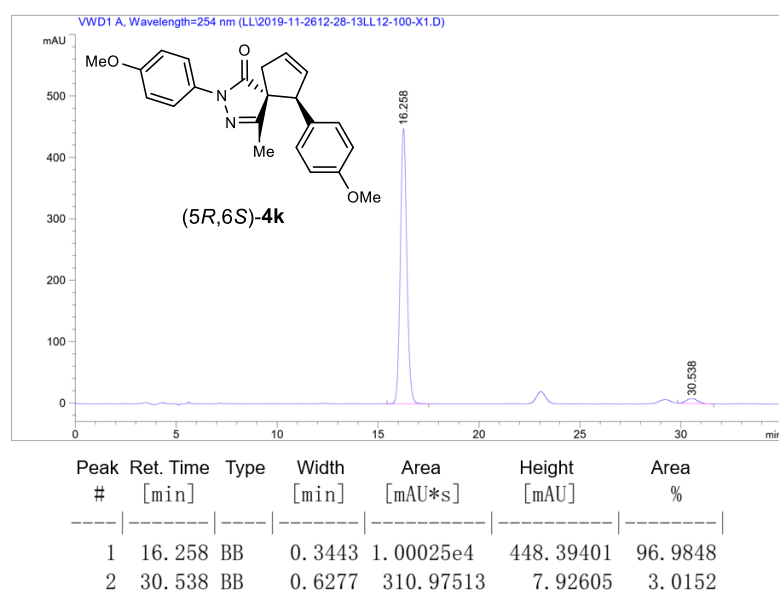

**(5S,6S)-2,6-bis(4-methoxyphenyl)-4-methyl-2,3-diazaspiro[4.4]nona-3,7-dien-1-one**

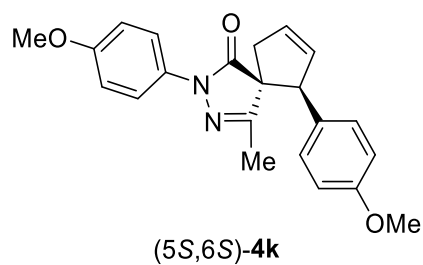

Yellow oil, 9.3 mg, 26% yield, 92% ee.  $R_f = 0.33$  (*n*-hexane:EtOAc = 5:1).  $[\alpha]_D^{20} = -7.50$  (*c* 1.0, CHCl<sub>3</sub>).

**<sup>1</sup>H NMR** (600 MHz, CDCl<sub>3</sub>, ppm): δ 7.32 (d, *J* = 9.0 Hz, 2H), 7.05 (d, *J* = 12.0 Hz, 2H), 6.79 (d, *J* = 8.4 Hz, 4H), 6.08-6.04 (m, 1H), 5.87-5.83 (m, 1H), 4.28 (s, 1H), 3.75 (s, 3H), 3.75 (s, 3H), 2.97-2.90 (m, 1H), 2.73-2.66 (m, 1H), 2.23 (s, 3H).

**<sup>13</sup>C NMR** (150 MHz, CDCl<sub>3</sub>, ppm): δ 173.9, 162.8, 159.3, 157.0, 131.8, 131.4, 130.7, 129.5, 129.4, 121.2, 114.0, 113.8, 63.0, 58.4, 55.7, 55.4, 39.4, 13.9.

**HPLC analysis:** Daicel CHIRALPAK AD-H, *n*-hexane:*i*-PrOH = 80:20, flow rate = 1.0 mL/min, λ = 254 nm, retention time: *t*<sub>major</sub> = 19.6 min, *t*<sub>minor</sub> = 31.1 min.

**HRMS** (ESI) calcd for C<sub>22</sub>H<sub>23</sub>N<sub>2</sub>O<sub>3</sub> [M + H]<sup>+</sup>: 363.1703, found 363.1702.

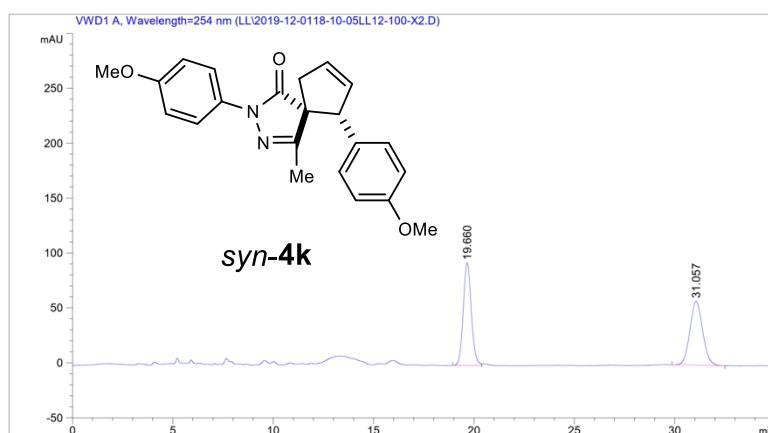

| Peak # | Ret. Time [min] | Type | Width [min] | Area [mAU*s] | Height [mAU] | Area %  |
|--------|-----------------|------|-------------|--------------|--------------|---------|
| 1      | 19.660          | BF   | 0.4309      | 2598.66138   | 93.32137     | 50.4271 |
| 2      | 31.057          | BB   | 0.6797      | 2554.64380   | 58.24865     | 49.5729 |

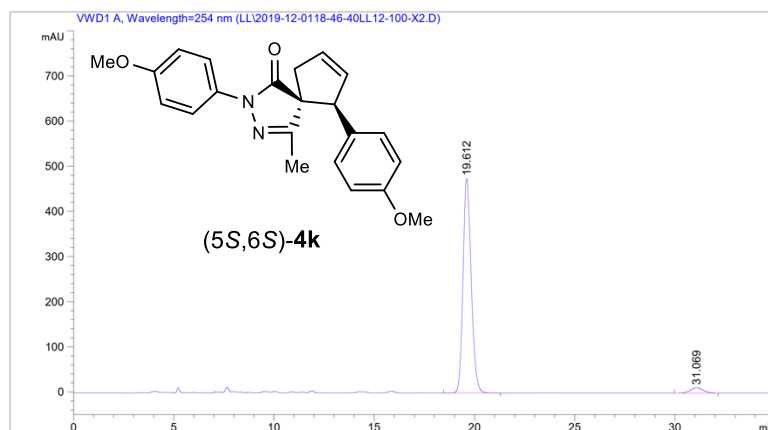

| Peak # | Ret. Time [min] | Type | Width [min] | Area [mAU*s] | Height [mAU] | Area %  |
|--------|-----------------|------|-------------|--------------|--------------|---------|
| 1      | 19.612          | BB   | 0.4376      | 1.35084e4    | 475.23856    | 96.2275 |
| 2      | 31.069          | BB   | 0.6775      | 529.58569    | 11.91637     | 3.7725  |

**(5*S*,6*R*)-2-(3-methoxyphenyl)-6-(4-methoxyphenyl)-4-methyl-2,3-diazaspiro[4.4]nona-3,7-dien-1-one**

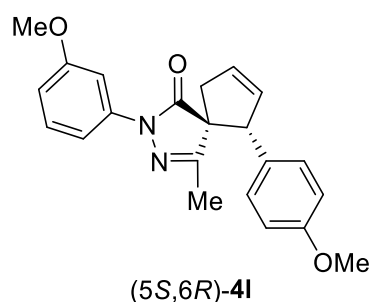

Yellow oil, 31.1 mg, 86% yield, 91% ee, 10:1 dr.  $R_f = 0.35$  (*n*-hexane:EtOAc = 5:1).  $[\alpha]_D^{20} = +28.25$  (*c* 1.0, CHCl<sub>3</sub>).

<sup>1</sup>H NMR (600 MHz, CDCl<sub>3</sub>, ppm):  $\delta$  7.55 (s, 1H), 7.52 (d, *J* = 8.4 Hz, 1H), 7.30 (t, *J* = 7.8 Hz, 1H), 7.01 (d, *J* = 8.4 Hz, 2H), 6.79-6.73 (m, 3H), 6.07-6.02 (m, 1H), 6.00-5.96 (m, 1H), 4.65 (s, 1H), 3.84 (s, 3H), 3.75 (s, 3H), 3.02-2.95 (m, 1H), 2.74-2.67 (m, 1H), 1.66 (s, 3H).

<sup>13</sup>C NMR (150 MHz, CDCl<sub>3</sub>, ppm):  $\delta$  177.0, 162.9, 160.2, 159.1, 139.4, 131.7, 130.0, 129.8, 128.1, 114.1, 111.2, 111.2, 104.3, 64.6, 59.3, 55.5, 55.3, 40.7, 15.2.

**HPLC analysis:** Daicel CHIRALPAK AD-H, *n*-hexane:*i*-PrOH = 80:20, flow rate = 1.0 mL/min,  $\lambda = 254$  nm, retention time:  $t_{\text{minor}} = 9.3$  min,  $t_{\text{major}} = 10.9$  min.

**HRMS** (ESI) calcd for C<sub>22</sub>H<sub>23</sub>N<sub>2</sub>O<sub>3</sub> [M + H]<sup>+</sup>: 363.1703, found 363.1704.

**(5*R*,6*S*)-2-(3-methoxyphenyl)-6-(4-methoxyphenyl)-4-methyl-2,3-diazaspiro[4.4]nona-3,7-dien-1-one**

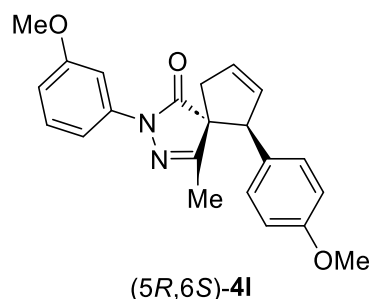

Yellow oil, 20.8 mg, 57% yield, 92% ee.

**HPLC analysis:** Daicel CHIRALPAK AD-H, *n*-hexane:*i*-PrOH = 80:20, flow rate = 1.0 mL/min,  $\lambda = 254$  nm, retention time:  $t_{\text{major}} = 9.2$  min,  $t_{\text{minor}} = 10.9$  min.

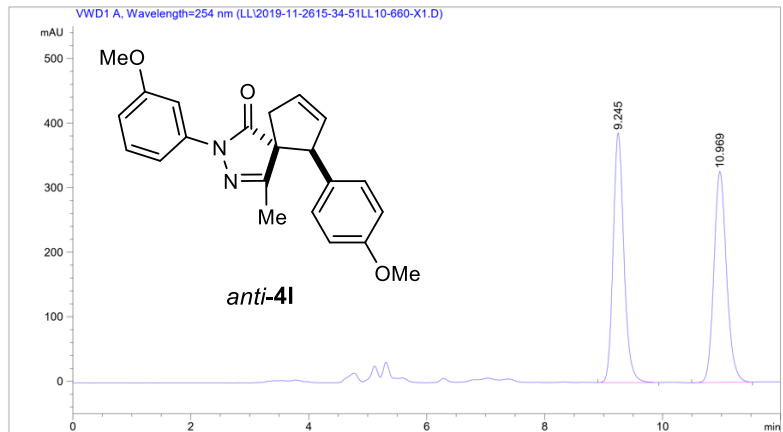

| Peak # | Ret. Time [min] | Type | Width [min] | Area [mAU*s] | Height [mAU] | Area %  |
|--------|-----------------|------|-------------|--------------|--------------|---------|
| 1      | 9.245           | BB   | 0.1939      | 4901.65186   | 386.55356    | 50.1856 |
| 2      | 10.969          | BB   | 0.2288      | 4865.38965   | 326.65305    | 49.8144 |

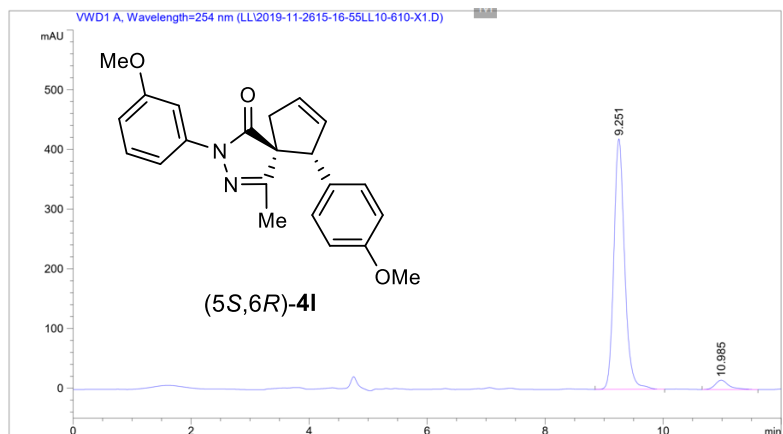

| Peak # | Ret. Time [min] | Type | Width [min] | Area [mAU*s] | Height [mAU] | Area %  |
|--------|-----------------|------|-------------|--------------|--------------|---------|
| 1      | 9.251           | BB   | 0.1930      | 5323.90771   | 419.63129    | 95.4940 |
| 2      | 10.985          | BB   | 0.2421      | 251.21257    | 15.58515     | 4.5060  |

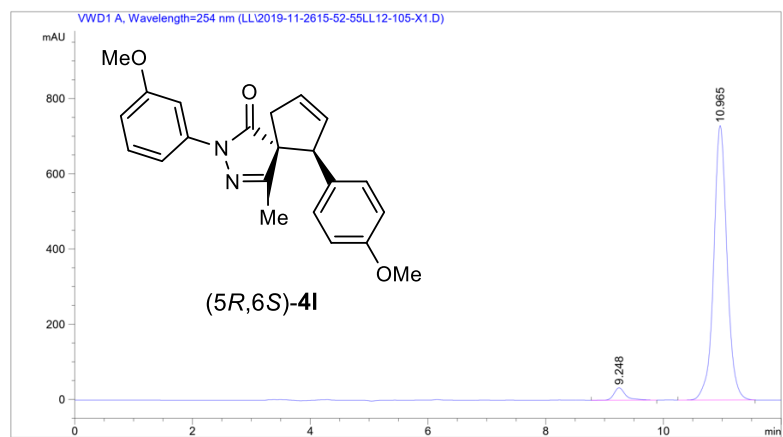

| Peak # | Ret. Time [min] | Type | Width [min] | Area [mAU*s] | Height [mAU] | Area %  |
|--------|-----------------|------|-------------|--------------|--------------|---------|
| 1      | 9.248           | BB   | 0.2032      | 445.82706    | 32.88392     | 3.7332  |
| 2      | 10.965          | BBA  | 0.2398      | 1.14964e4    | 729.67804    | 96.2668 |

**(5*S*,6*S*)-2-(3-methoxyphenyl)-6-(4-methoxyphenyl)-4-methyl-2,3-diazaspiro[4.4]nona-3,7-dien-1-one**

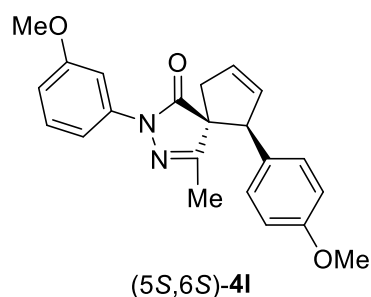

Yellow oil, 8.9 mg, 25% yield, 93% ee.  $R_f = 0.32$  (*n*-hexane:EtOAc = 5:1).  $[\alpha]_D^{20} = -10.89$  (*c* 1.0, CHCl<sub>3</sub>).

<sup>1</sup>H NMR (600 MHz, CDCl<sub>3</sub>, ppm):  $\delta$  7.16 (t,  $J = 8.4$  Hz, 1H), 7.10 (d,  $J = 7.8$  Hz, 1H), 7.07 (t,  $J = 2.4$  Hz, 1H), 7.04 (d,  $J = 8.4$  Hz, 2H), 6.78 (d,  $J = 9.0$  Hz, 2H), 6.65-6.61 (m, 1H), 6.09-6.04 (m, 1H), 5.88-5.83 (m, 1H), 4.29 (s, 1H), 3.74 (s, 3H), 3.73 (s, 3H), 2.97-2.90 (m, 1H), 2.73-2.66 (m, 1H), 2.24 (s, 3H).

<sup>13</sup>C NMR (150 MHz, CDCl<sub>3</sub>, ppm):  $\delta$  174.1, 162.8, 159.9, 159.2, 139.0, 131.6, 130.6, 129.5, 129.4, 129.2, 113.7, 111.5, 111.2, 104.5, 63.2, 58.4, 55.4, 55.3, 39.3, 13.8.

**HPLC analysis:** Daicel CHIRALPAK AD-H, *n*-hexane:*i*-PrOH = 80:20, flow rate = 1.0 mL/min,  $\lambda = 254$  nm, retention time:  $t_{\text{major}} = 7.9$  min,  $t_{\text{minor}} = 19.0$  min.

**HRMS (ESI)** calcd for C<sub>22</sub>H<sub>23</sub>N<sub>2</sub>O<sub>3</sub> [M + H]<sup>+</sup>: 363.1703, found 363.1705.

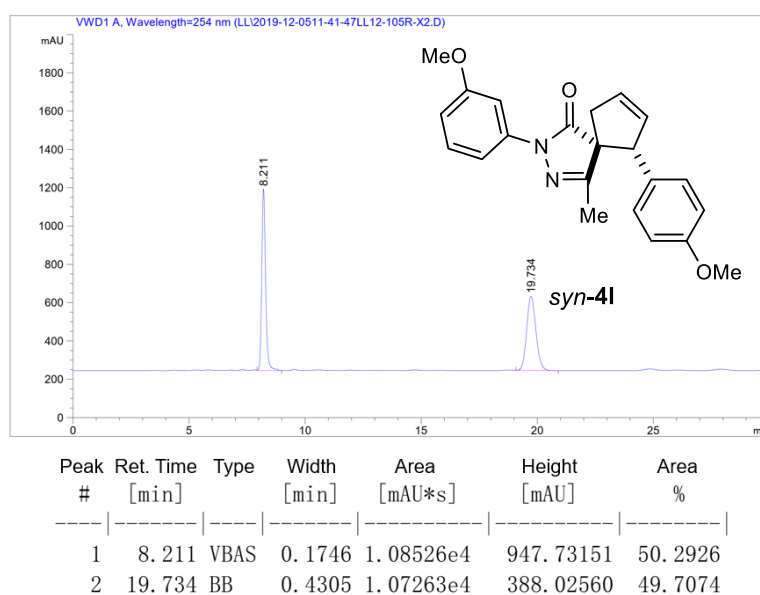



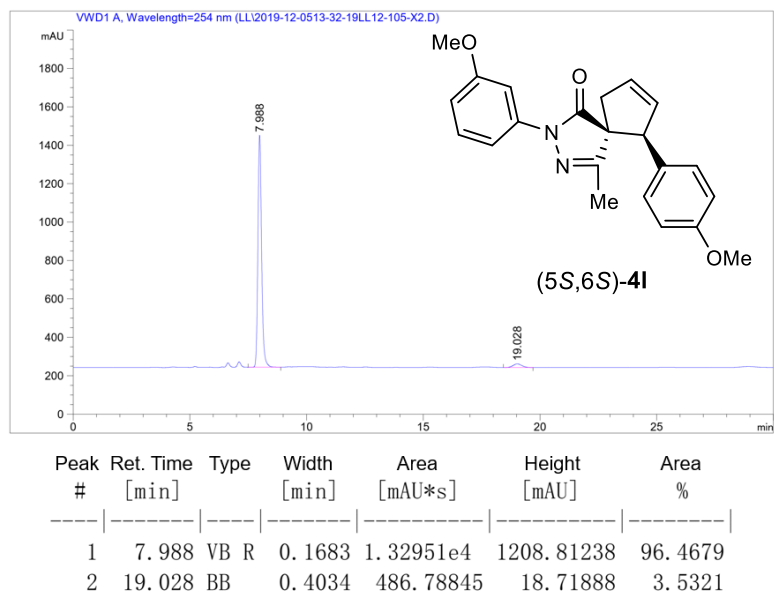

**(5S,6R)-2-(3,5-dimethylphenyl)-6-(4-methoxyphenyl)-4-methyl-2,3-diazaspiro[4.4]nona-3,7-dien-1-one**

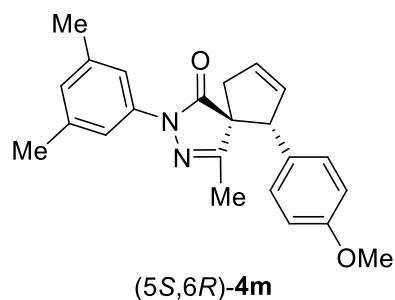

Yellow oil, 31.2 mg, 87% yield, 93% ee, 10:1 dr.  $R_f = 0.46$  (*n*-hexane:EtOAc = 5:1).  $[\alpha]_D^{20} = +28.12$  (*c* 1.0, CHCl<sub>3</sub>).

<sup>1</sup>H NMR (400 MHz, CDCl<sub>3</sub>, ppm):  $\delta$  7.54 (s, 2H), 7.02 (d, *J* = 8.8 Hz, 2H), 6.84 (s, 1H), 6.77 (d, *J* = 8.4 Hz, 2H), 6.08-6.03 (m, 1H), 6.01-5.95 (m, 1H), 4.65 (s, 1H), 3.76 (s, 3H), 3.03-2.94 (m, 1H), 2.73-2.65 (m, 1H), 2.35 (s, 6H), 1.67 (s, 3H).

<sup>13</sup>C NMR (100 MHz, CDCl<sub>3</sub>, ppm):  $\delta$  176.9, 162.9, 159.0, 138.7, 138.1, 131.7, 130.1, 129.4, 128.1, 126.9, 116.8, 114.1, 64.5, 59.3, 55.3, 40.7, 21.6, 15.2.

**HPLC analysis:** Daicel CHIRALPAK AD-H, *n*-hexane:*i*-PrOH = 80:20, flow rate = 1.0 mL/min,  $\lambda = 254$  nm, retention time:  $t_{\text{major}} = 5.7$  min,  $t_{\text{minor}} = 7.7$  min.

**HRMS (ESI)** calcd for C<sub>23</sub>H<sub>25</sub>N<sub>2</sub>O<sub>2</sub> [M + H]<sup>+</sup>: 361.1911, found 361.1912.

**(5R,6S)-2-(3,5-dimethylphenyl)-6-(4-methoxyphenyl)-4-methyl-2,3-diazaspiro[4.4]**

## nona-3,7-dien-1-one

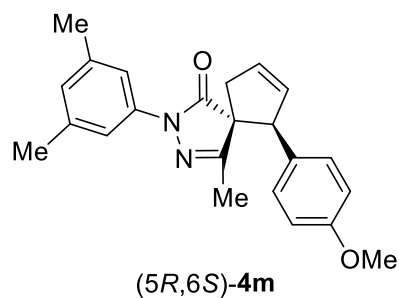

Yellow oil, 23.9 mg, 66% yield, 93% ee.

**HPLC analysis:** Daicel CHIRALPAK AD-H, *n*-hexane:*i*-PrOH = 80:20, flow rate = 1.0 mL/min,  $\lambda = 254$  nm, retention time:  $t_{\text{minor}} = 5.8$  min,  $t_{\text{major}} = 7.8$  min.

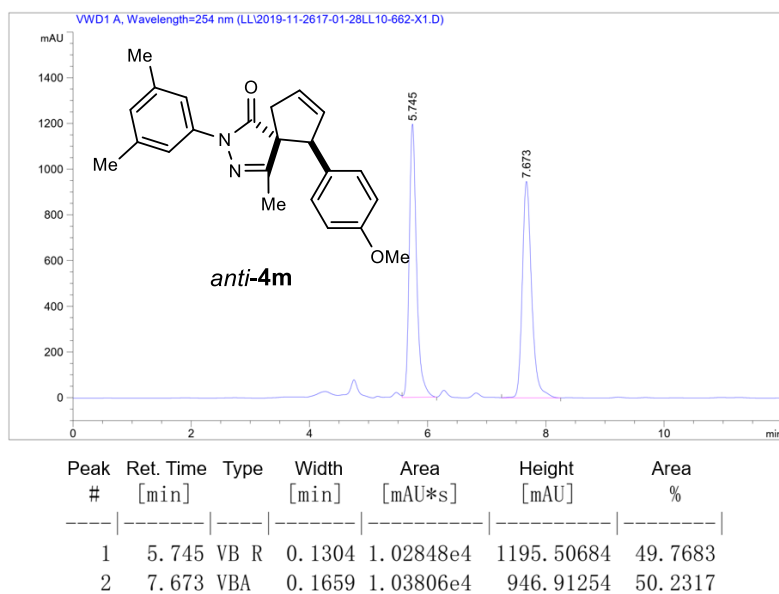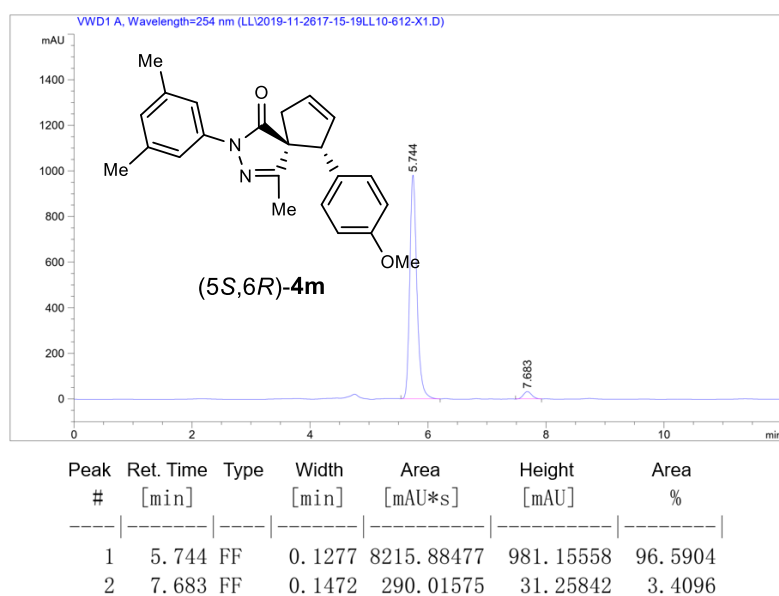

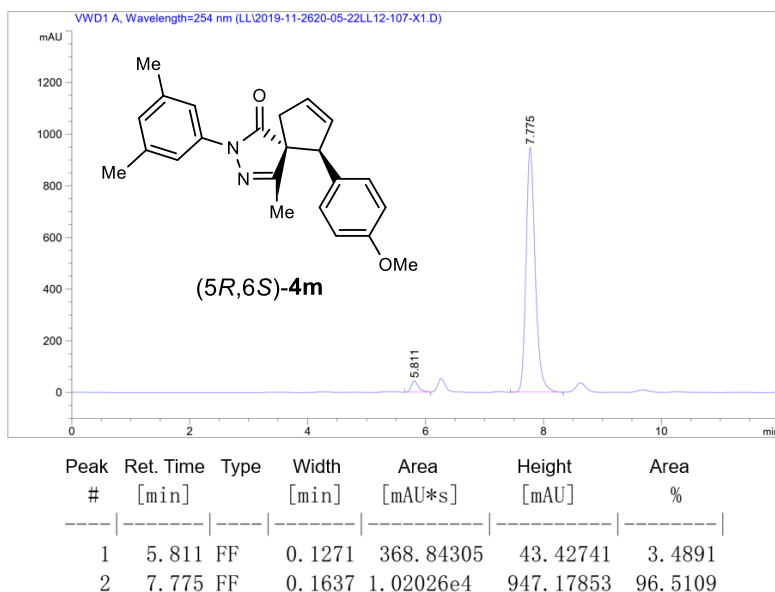

**(5S,6S)-2-(3,5-dimethylphenyl)-6-(4-methoxyphenyl)-4-methyl-2,3-diazaspiro[4.4]nona-3,7-dien-1-one**

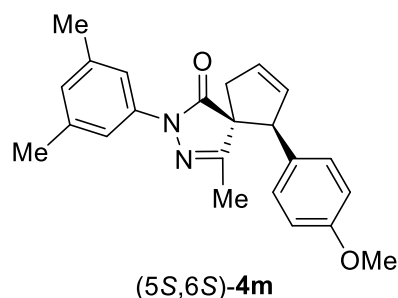

Yellow oil, 11.4 mg, 32% yield, 93% ee.  $R_f = 0.46$  (*n*-hexane:EtOAc = 5:1).  $[\alpha]_D^{20} = -18.57$  (*c* 1.0, CHCl<sub>3</sub>).

<sup>1</sup>H NMR (600 MHz, CDCl<sub>3</sub>, ppm):  $\delta$  7.08 (s, 2H), 7.05 (d, *J* = 8.4 Hz, 2H), 6.79 (d, *J* = 8.4 Hz, 2H), 6.73 (s, 1H), 6.08-6.04 (m, 1H), 5.87-5.83 (m, 1H), 4.28 (s, 1H), 3.75 (s, 3H), 2.97-2.90 (m, 1H), 2.72-2.66 (m, 1H), 2.24 (s, 6H), 2.24 (s, 3H).

<sup>13</sup>C NMR (150 MHz, CDCl<sub>3</sub>, ppm):  $\delta$  174.0, 162.7, 159.2, 138.4, 137.7, 131.7, 130.5, 129.5, 129.3, 126.7, 117.2, 113.7, 63.0, 58.3, 55.3, 39.4, 21.5, 13.8.

**HPLC analysis:** Daicel CHIRALPAK OD-H, *n*-hexane:*i*-PrOH = 90:10, flow rate = 1.0 mL/min,  $\lambda = 254$  nm, retention time:  $t_{\text{minor}} = 7.9$  min,  $t_{\text{major}} = 10.8$  min.

**HRMS (ESI)** calcd for C<sub>23</sub>H<sub>25</sub>N<sub>2</sub>O<sub>2</sub> [M + H]<sup>+</sup>: 361.1911, found 361.1909.

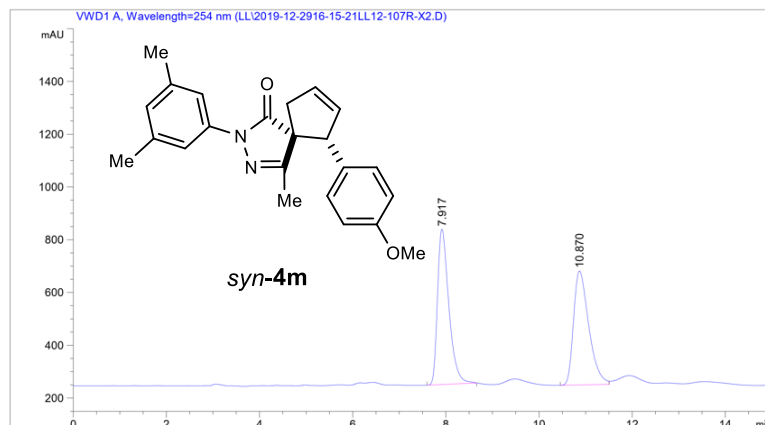

| Peak # | Ret. Time [min] | Type | Width [min] | Area [mAU*s] | Height [mAU] | Area %  |
|--------|-----------------|------|-------------|--------------|--------------|---------|
| 1      | 7.917           | BBA  | 0.2572      | 9955.71387   | 588.92969    | 50.3976 |
| 2      | 10.870          | BF   | 0.3457      | 9798.61816   | 431.86929    | 49.6024 |

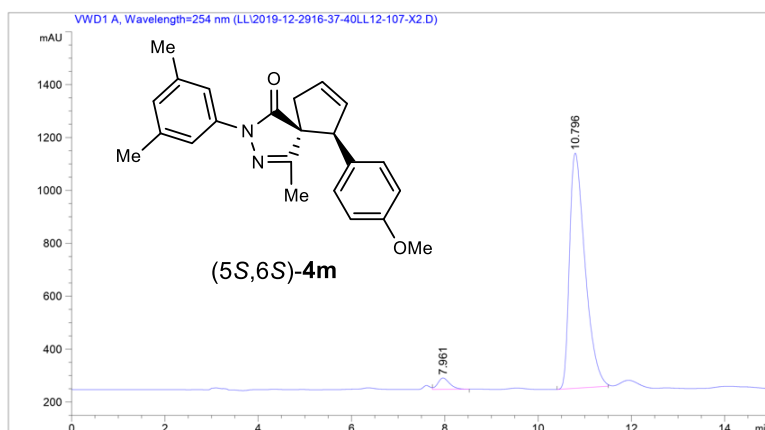

| Peak # | Ret. Time [min] | Type | Width [min] | Area [mAU*s] | Height [mAU] | Area %  |
|--------|-----------------|------|-------------|--------------|--------------|---------|
| 1      | 7.961           | VB   | 0.2640      | 739.30566    | 42.69846     | 3.4622  |
| 2      | 10.796          | BF   | 0.3546      | 2.06143e4    | 888.92120    | 96.5378 |

**(5S,6R)-2-(4-fluorophenyl)-6-(4-methoxyphenyl)-4-methyl-2,3-diazaspiro[4.4]nona-3,7-dien-1-one**

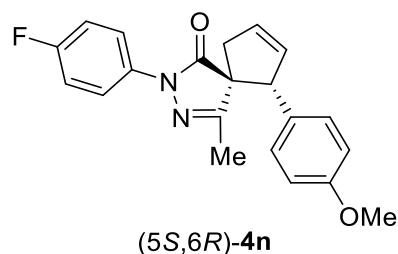

Yellow oil, 24.9 mg, 71% yield, 90% ee, 10:1 dr.  $R_f = 0.42$  (*n*-hexane:EtOAc = 5:1).

$[\alpha]_D^{20} = +23.61$  (*c* 1.0, CHCl<sub>3</sub>).

<sup>1</sup>H NMR (400 MHz, CDCl<sub>3</sub>, ppm):  $\delta$  7.90-7.84 (m, 2H), 7.09 (t, *J* = 8.4 Hz, 2H), 7.00

(d,  $J = 8.4$  Hz, 2H), 6.08-6.02 (m, 1H), 6.01-5.95 (m, 1H), 4.65 (s, 1H), 3.82 (s, 3H), 3.76 (s, 3H), 3.04-2.95 (m, 1H), 2.75-2.66 (m, 1H), 1.67 (s, 3H).

$^{13}\text{C}$  NMR (100 MHz,  $\text{CDCl}_3$ , ppm):  $\delta$  176.7, 163.2, 160.0 (d,  $^1J_{\text{C-F}} = 242.7$  Hz), 159.1, 134.5, 134.4, 131.7, 129.9, 129.4, 128.1, 120.7 (d,  $^3J_{\text{C-F}} = 7.8$  Hz), 115.6 (d,  $^2J_{\text{C-F}} = 22.3$  Hz), 114.1, 64.5, 59.4, 55.3, 40.6, 15.2.

$^{19}\text{F}$  NMR (565 MHz,  $\text{CDCl}_3$ , ppm):  $\delta$  -111.3 (s, 1F, CF).

**HPLC analysis:** Daicel CHIRALPAK AD-H, *n*-hexane:*i*-PrOH = 80:20, flow rate = 1.0 mL/min,  $\lambda = 254$  nm, retention time:  $t_{\text{minor}} = 8.9$  min,  $t_{\text{major}} = 9.9$  min.

**HRMS** (ESI) calcd for  $\text{C}_{21}\text{H}_{20}\text{FN}_2\text{O}_2$  [ $\text{M} + \text{H}$ ] $^+$ : 351.1503, found 351.1502.

**(5*R*,6*S*)-2-(4-fluorophenyl)-6-(4-methoxyphenyl)-4-methyl-2,3-diazaspiro[4.4]nona-3,7-dien-1-one**

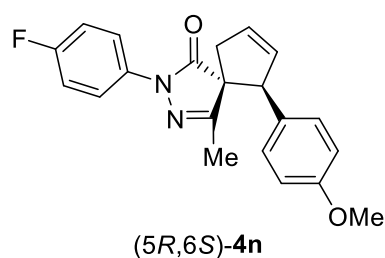

Yellow oil, 17.6 mg, 50% yield, 93% ee.

**HPLC analysis:** Daicel CHIRALPAK AD-H, *n*-hexane:*i*-PrOH = 80:20, flow rate = 1.0 mL/min,  $\lambda = 254$  nm, retention time:  $t_{\text{major}} = 8.9$  min,  $t_{\text{minor}} = 9.9$  min.

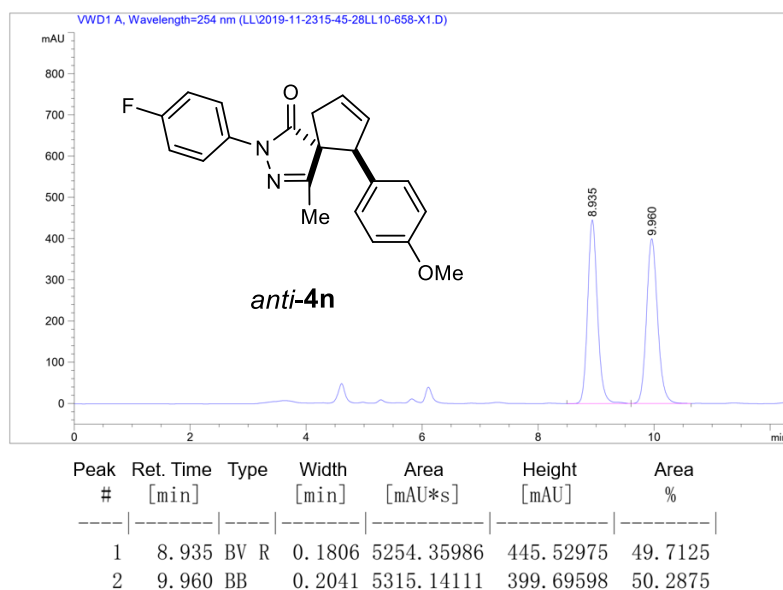

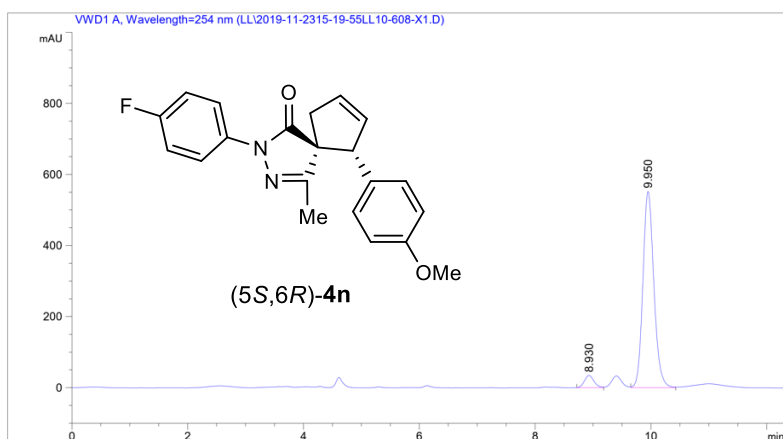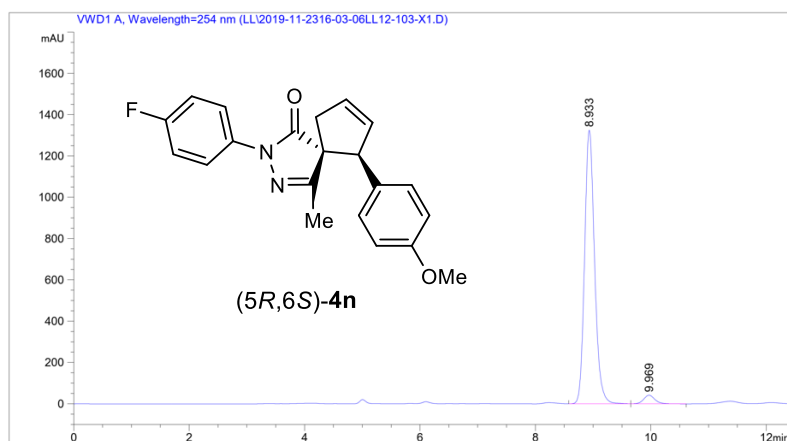

**(5S,6S)-2-(4-fluorophenyl)-6-(4-methoxyphenyl)-4-methyl-2,3-diazaspiro[4.4]nona-3,7-dien-1-one**

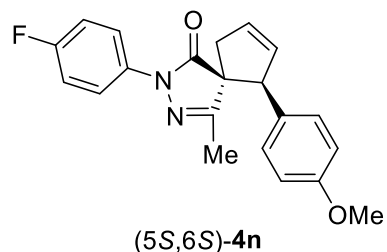

Yellow oil, 8.0 mg, 23% yield, 94% ee.  $R_f = 0.39$  (*n*-hexane:EtOAc = 5:1).  $[\alpha]_D^{20} = -32.92$  (*c* 1.0, CHCl<sub>3</sub>).

<sup>1</sup>H NMR (600 MHz, CDCl<sub>3</sub>, ppm):  $\delta$  7.45-7.40 (m, 2H), 7.04 (d, *J* = 8.4 Hz, 2H), 6.94 (t, *J* = 9.0 Hz, 2H), 6.78 (d, *J* = 9.0 Hz, 2H), 6.09-6.05 (m, 1H), 5.87-5.84 (m,

1H), 4.29 (s, 1H), 3.74 (s, 3H), 2.97-2.90 (m, 1H), 2.73-2.67 (m, 1H), 2.24 (s, 3H).

<sup>13</sup>C NMR (150 MHz, CDCl<sub>3</sub>, ppm): δ 173.9, 163.1, 159.8 (d, <sup>1</sup>J<sub>C-F</sub> = 161.8 Hz), 159.2, 134.0, 131.6, 130.6, 129.4, 129.1, 120.9 (d, <sup>3</sup>J<sub>C-F</sub> = 5.3 Hz), 115.4 (d, <sup>2</sup>J<sub>C-F</sub> = 14.9 Hz), 113.7, 63.0, 58.4, 55.3, 39.2, 13.8.

<sup>19</sup>F NMR (565 MHz, CDCl<sub>3</sub>, ppm): δ -117.7 (s, 1F, CF).

**HPLC analysis:** Daicel CHIRALPAK AD-H, *n*-hexane:*i*-PrOH = 80:20, flow rate = 1.0 mL/min, λ = 254 nm, retention time: *t*<sub>major</sub> = 8.7 min, *t*<sub>minor</sub> = 15.3 min.

**HRMS (ESI) calcd for C<sub>21</sub>H<sub>20</sub>FN<sub>2</sub>O<sub>2</sub> [M + H]<sup>+</sup>: 351.1503, found 351.1504.**

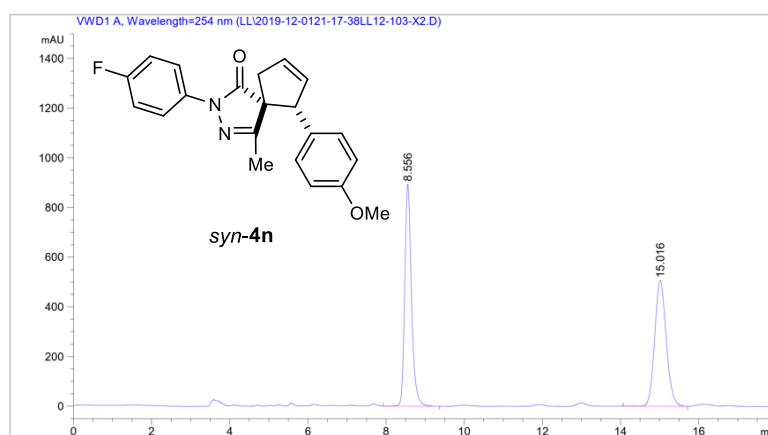

| Peak # | Ret. Time [min] | Type | Width [min] | Area [mAU*s] | Height [mAU] | Area %  |
|--------|-----------------|------|-------------|--------------|--------------|---------|
| 1      | 8.556           | VB R | 0.1813      | 1.06665e4    | 893.50482    | 50.6873 |
| 2      | 15.016          | VV R | 0.3163      | 1.03773e4    | 506.02167    | 49.3127 |

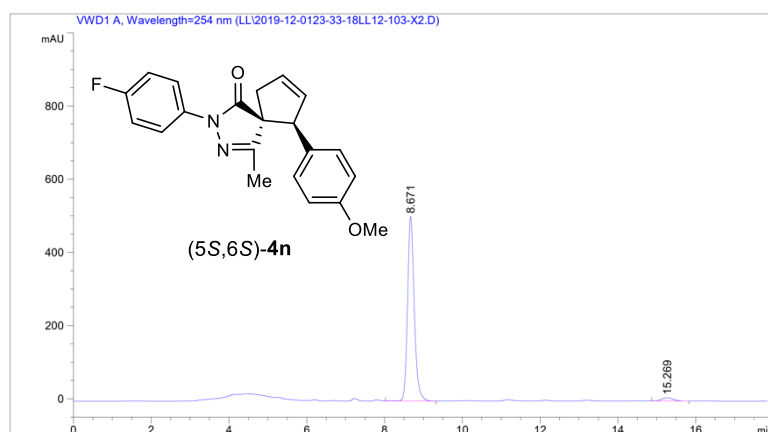

| Peak # | Ret. Time [min] | Type | Width [min] | Area [mAU*s] | Height [mAU] | Area %  |
|--------|-----------------|------|-------------|--------------|--------------|---------|
| 1      | 8.671           | BB S | 0.1811      | 6006.37158   | 503.79129    | 97.1454 |
| 2      | 15.269          | BB   | 0.3141      | 176.49692    | 8.79476      | 2.8546  |

**(5*S*,6*R*)-2-(4-chlorophenyl)-6-(4-methoxyphenyl)-4-methyl-2,3-diazaspiro[4.4]nona-3,7-dien-1-one**

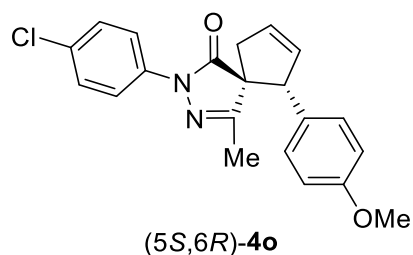

Yellow oil, 25.8 mg, 70% yield, 87% ee, 9:1 dr.  $R_f = 0.45$  (*n*-hexane:EtOAc = 5:1).

$[\alpha]_D^{20} = +25.13$  (*c* 1.0, CHCl<sub>3</sub>).

<sup>1</sup>H NMR (400 MHz, CDCl<sub>3</sub>, ppm):  $\delta$  7.88 (d, *J* = 8.8 Hz, 2H), 7.36 (d, *J* = 8.8 Hz, 2H), 6.99 (d, *J* = 8.4 Hz, 2H), 6.77 (d, *J* = 8.8 Hz, 2H), 6.07-6.02 (m, 1H), 6.01-5.95 (m, 1H), 4.64 (s, 1H), 3.76 (s, 3H), 3.03-2.95 (m, 1H), 2.75-2.66 (m, 1H), 1.67 (s, 3H).

<sup>13</sup>C NMR (100 MHz, CDCl<sub>3</sub>, ppm):  $\delta$  176.9, 163.3, 159.1, 136.9, 131.7, 130.1, 129.9, 129.4, 129.0, 128.1, 120.0, 114.1, 64.6, 59.5, 55.3, 40.6, 15.2.

**HPLC analysis:** Daicel CHIRALPAK AD-H, *n*-hexane:*i*-PrOH = 80:20, flow rate = 1.0 mL/min,  $\lambda = 254$  nm, retention time:  $t_{\text{minor}} = 9.4$  min,  $t_{\text{major}} = 13.0$  min.

**HRMS (ESI)** calcd for C<sub>21</sub>H<sub>20</sub>ClN<sub>2</sub>O<sub>2</sub> [M + H]<sup>+</sup>: 367.1208, found 367.1209.

**(5*R*,6*S*)-2-(4-chlorophenyl)-6-(4-methoxyphenyl)-4-methyl-2,3-diazaspiro[4.4]nona-3,7-dien-1-one (101-X1)**

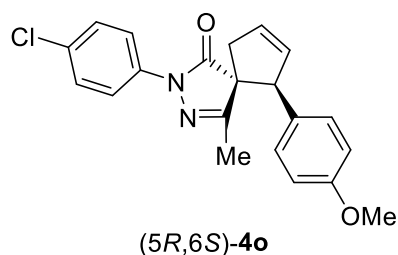

Yellow oil, 24.0 mg, 66% yield, 88% ee.

**HPLC analysis:** Daicel CHIRALPAK AD-H, *n*-hexane:*i*-PrOH = 80:20, flow rate = 1.0 mL/min,  $\lambda = 254$  nm, retention time:  $t_{\text{major}} = 9.4$  min,  $t_{\text{minor}} = 13.1$  min.



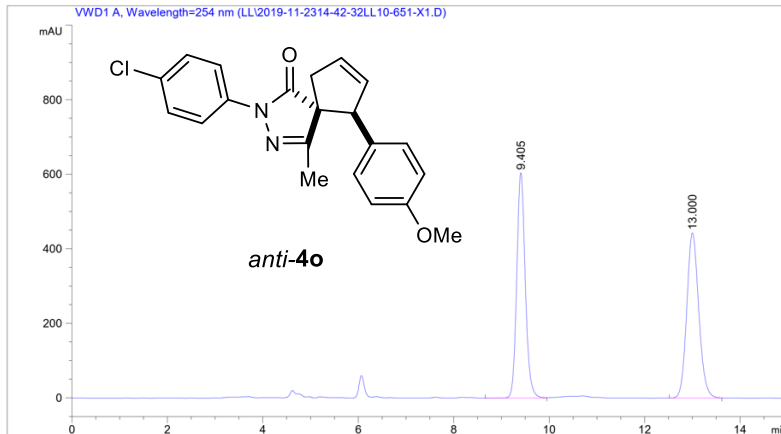

| Peak # | Ret. Time [min] | Type | Width [min] | Area [mAU*s] | Height [mAU] | Area %  |
|--------|-----------------|------|-------------|--------------|--------------|---------|
| 1      | 9.405           | BF   | 0.1910      | 7511.94092   | 604.43817    | 49.2778 |
| 2      | 13.000          | FFA  | 0.2686      | 7732.13623   | 443.10541    | 50.7222 |

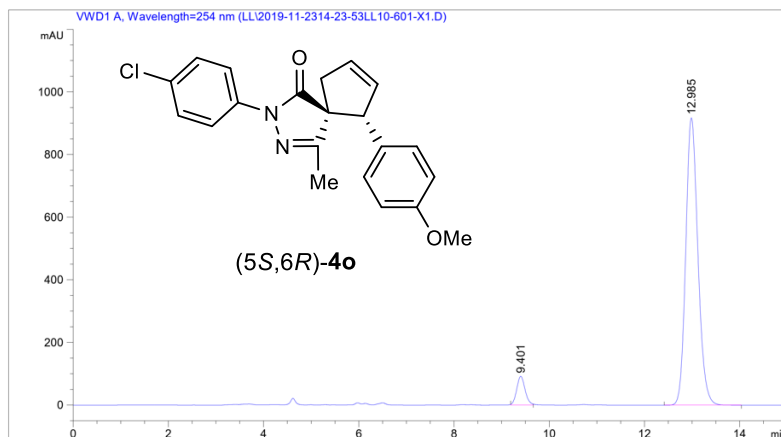

| Peak # | Ret. Time [min] | Type | Width [min] | Area [mAU*s] | Height [mAU] | Area %  |
|--------|-----------------|------|-------------|--------------|--------------|---------|
| 1      | 9.401           | FFA  | 0.1895      | 1120.90771   | 91.77544     | 6.4642  |
| 2      | 12.985          | FF   | 0.2712      | 1.62193e4    | 917.46088    | 93.5358 |

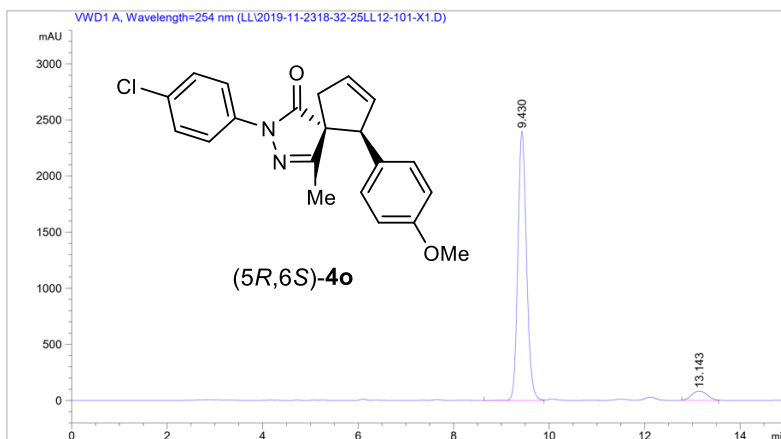

| Peak # | Ret. Time [min] | Type | Width [min] | Area [mAU*s] | Height [mAU] | Area %  |
|--------|-----------------|------|-------------|--------------|--------------|---------|
| 1      | 9.430           | VF R | 0.1950      | 3.02498e4    | 2398.56909   | 94.1339 |
| 2      | 13.143          | FFA  | 0.3696      | 1885.06970   | 82.48037     | 5.8661  |

**(5*S*,6*S*)-2-(4-chlorophenyl)-6-(4-methoxyphenyl)-4-methyl-2,3-diazaspiro[4.4]nona-3,7-dien-1-one**

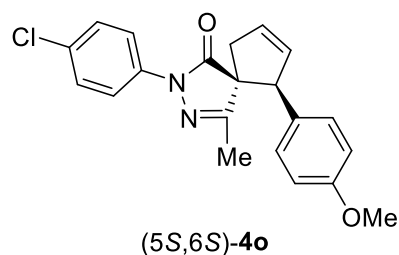

Yellow oil, 11.7 mg, 32% yield, 93% ee.  $R_f = 0.33$  (*n*-hexane:EtOAc = 5:1).  $[\alpha]_D^{20} = -40.46$  (*c* 1.0, CHCl<sub>3</sub>).

<sup>1</sup>H NMR (600 MHz, CDCl<sub>3</sub>, ppm):  $\delta$  7.47 (d, *J* = 9.0 Hz, 2H), 7.21 (d, *J* = 8.4 Hz, 2H), 7.02 (d, *J* = 8.4 Hz, 2H), 6.77 (d, *J* = 8.4 Hz, 2H), 6.09-6.04 (m, 1H), 5.87-5.83 (m, 1H), 4.28 (s, 1H), 3.74 (s, 3H), 2.97-2.90 (m, 1H), 2.73-2.67 (m, 1H), 2.24 (s, 3H).

<sup>13</sup>C NMR (150 MHz, CDCl<sub>3</sub>, ppm):  $\delta$  174.0, 163.3, 159.2, 136.5, 131.6, 130.5, 129.7, 129.4, 129.1, 128.7, 120.1, 113.7, 63.1, 58.5, 55.3, 39.3, 13.8.

**HPLC analysis:** Daicel CHIRALPAK AD-H, *n*-hexane:*i*-PrOH = 80:20, flow rate = 1.0 mL/min,  $\lambda = 254$  nm, retention time:  $t_{\text{major}} = 9.9$  min,  $t_{\text{minor}} = 19.2$  min.

**HRMS (ESI)** calcd for C<sub>21</sub>H<sub>20</sub>ClN<sub>2</sub>O<sub>2</sub> [M + H]<sup>+</sup>: 367.1208, found 367.1206.

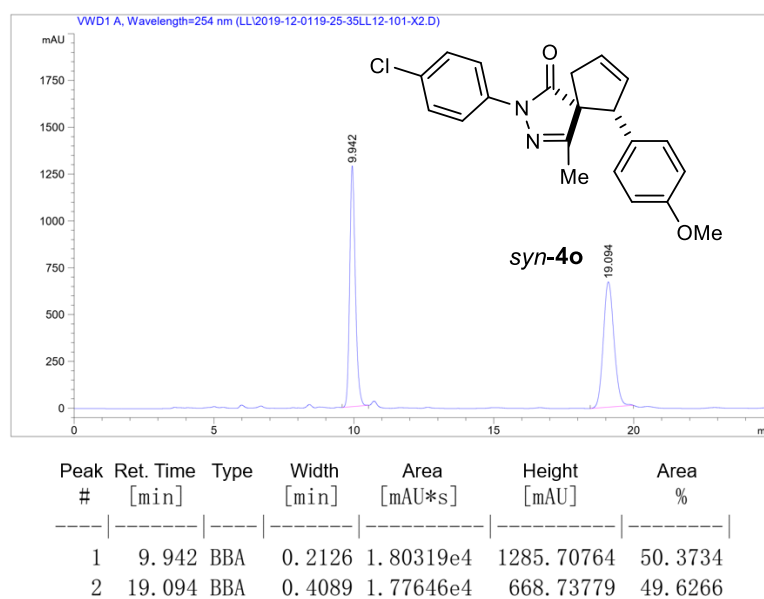

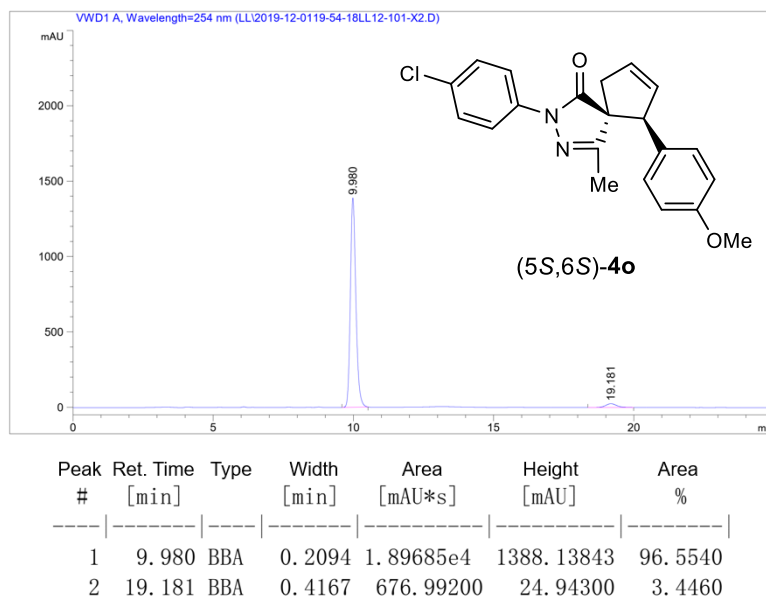

**(5S,6R)-6-(4-methoxyphenyl)-4-methyl-2-(naphthalen-2-yl)-2,3-diazaspiro[4.4]nona-3,7-dien-1-one**

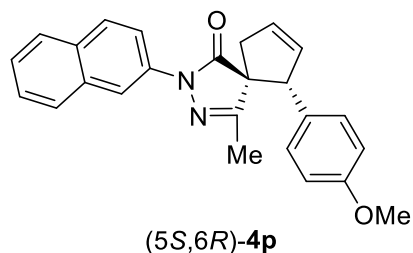

Yellow oil, 32.1 mg, 84% yield, 90% ee, 10:1 dr.  $R_f = 0.34$  (*n*-hexane:EtOAc = 5:1).

$[\alpha]_D^{20} = +30.55$  (*c* 1.0, CHCl<sub>3</sub>).

<sup>1</sup>H NMR (400 MHz, CDCl<sub>3</sub>, ppm):  $\delta$  8.40 (s, 1H), 8.15-8.10 (m, 1H), 7.91-7.80 (m, 3H), 7.52-7.41 (m, 2H), 7.04 (d, *J* = 8.4 Hz, 2H), 6.77 (d, *J* = 8.4 Hz, 2H), 6.10-6.05 (m, 1H), 6.04-5.98 (m, 1H), 4.71 (s, 1H), 3.75 (s, 3H), 3.09-3.01 (m, 1H), 2.79-2.71 (m, 1H), 1.73 (s, 3H).

<sup>13</sup>C NMR (100 MHz, CDCl<sub>3</sub>, ppm):  $\delta$  177.1, 163.2, 159.1, 135.9, 133.7, 131.7, 131.1, 130.0, 129.5, 128.8, 128.1, 127.7, 126.6, 125.4, 118.6, 116.0, 114.1, 64.7, 59.5, 55.3, 40.7, 15.3.

**HPLC analysis:** Daicel CHIRALPAK AD-H, *n*-hexane:*i*-PrOH = 80:20, flow rate = 1.0 mL/min,  $\lambda = 254$  nm, retention time:  $t_{\text{minor}} = 19.0$  min,  $t_{\text{major}} = 24.4$  min.

**HRMS (ESI)** calcd for C<sub>25</sub>H<sub>23</sub>N<sub>2</sub>O<sub>2</sub> [M + H]<sup>+</sup>: 383.1754, found 383.1751.

**(5*R*,6*S*)-6-(4-methoxyphenyl)-4-methyl-2-(naphthalen-2-yl)-2,3-diazaspiro[4.4]nona-3,7-dien-1-one**

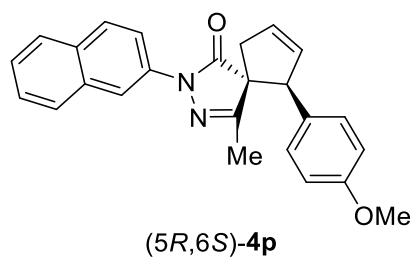

Yellow oil, 22.6 mg, 59% yield, 94% ee.

**HPLC analysis:** Daicel CHIRALPAK AD-H, *n*-hexane:*i*-PrOH = 80:20, flow rate = 1.0 mL/min,  $\lambda = 254$  nm, retention time:  $t_{\text{major}} = 18.8$  min,  $t_{\text{minor}} = 24.2$  min.

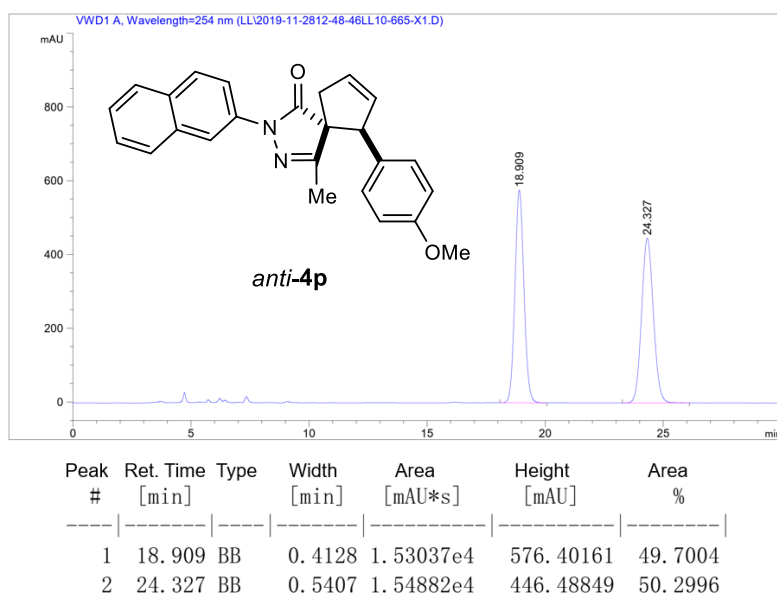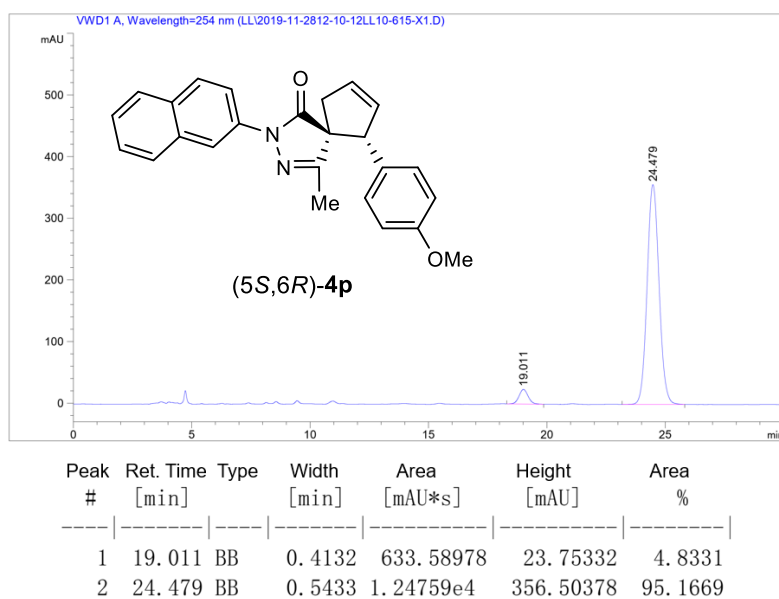

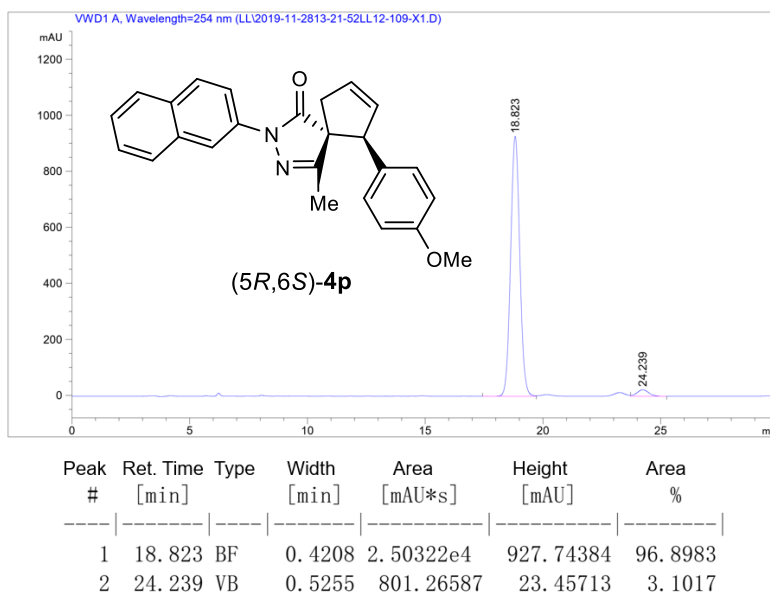

**(5S,6S)-6-(4-methoxyphenyl)-4-methyl-2-(naphthalen-2-yl)-2,3-diazaspiro[4.4]nona-3,7-dien-1-one**

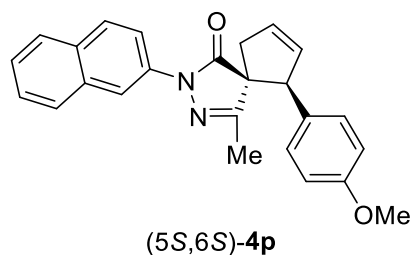

Yellow oil, 9.1 mg, 24% yield, 91% ee.  $R_f = 0.31$  (*n*-hexane:EtOAc = 5:1).  $[\alpha]_D^{20} = -23.82$  (*c* 1.0, CHCl<sub>3</sub>).

<sup>1</sup>H NMR (600 MHz, CDCl<sub>3</sub>, ppm):  $\delta$  7.94 (s, 1H), 7.77-7.68 (m, 4H), 7.42 (t, *J* = 7.8 Hz, 1H), 7.38 (t, *J* = 7.8 Hz, 1H), 7.07 (d, *J* = 8.4 Hz, 2H), 7.04 (d, *J* = 8.4 Hz, 2H), 6.78 (d, *J* = 9.0 Hz, 2H), 6.11-6.09 (m, 1H), 5.90-5.86 (m, 1H), 4.33 (s, 1H), 3.72 (s, 3H), 3.03-2.95 (m, 1H), 2.77-2.70 (m, 1H), 2.29 (s, 3H).

<sup>13</sup>C NMR (150 MHz, CDCl<sub>3</sub>, ppm):  $\delta$  174.3, 163.3, 159.3, 135.7, 133.7, 131.8, 131.1, 130.7, 129.6, 129.3, 128.6, 128.1, 127.7, 126.4, 125.3, 118.9, 116.2, 113.9, 63.3, 58.6, 55.4, 39.5, 14.0.

**HPLC analysis:** Daicel CHIRALPAK AD-H, *n*-hexane:*i*-PrOH = 80:20, flow rate = 1.0 mL/min,  $\lambda = 254$  nm, retention time:  $t_{major} = 19.1$  min,  $t_{minor} = 28.5$  min.

**HRMS** (ESI) calcd for C<sub>25</sub>H<sub>23</sub>N<sub>2</sub>O<sub>2</sub> [M + H]<sup>+</sup>: 383.1754, found 383.1752.

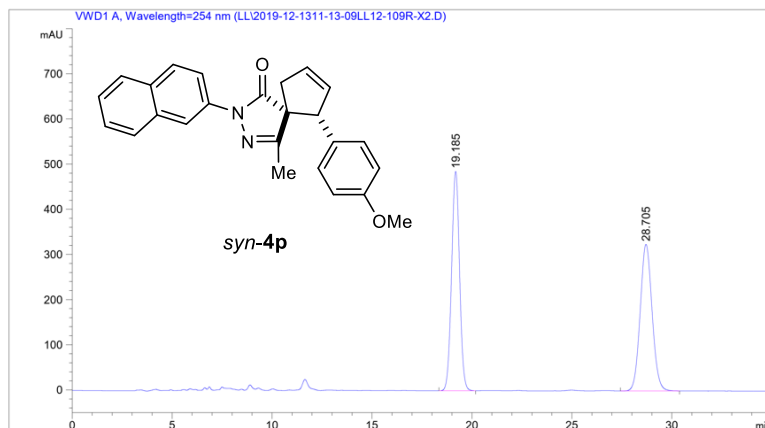

| Peak # | Ret. Time [min] | Type | Width [min] | Area [mAU*s] | Height [mAU] | Area %  |
|--------|-----------------|------|-------------|--------------|--------------|---------|
| 1      | 19.185          | BB   | 0.4317      | 1.34769e4    | 485.73447    | 50.0248 |
| 2      | 28.705          | BB   | 0.6398      | 1.34635e4    | 324.66049    | 49.9752 |

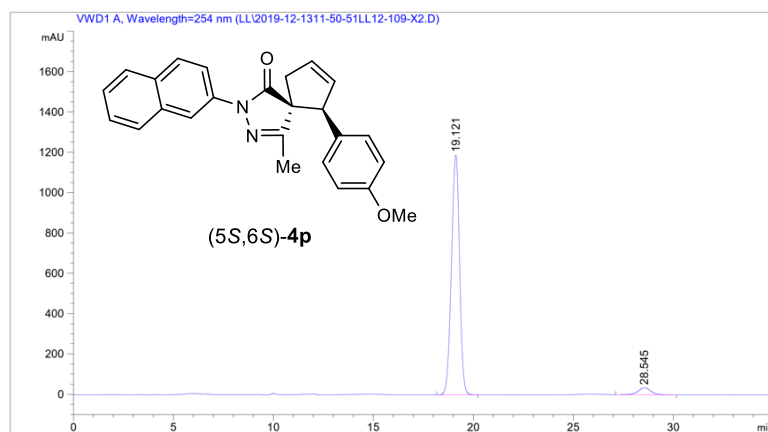

| Peak # | Ret. Time [min] | Type | Width [min] | Area [mAU*s] | Height [mAU] | Area %  |
|--------|-----------------|------|-------------|--------------|--------------|---------|
| 1      | 19.121          | BB   | 0.4445      | 3.34564e4    | 1188.21973   | 95.5364 |
| 2      | 28.545          | BB   | 0.6808      | 1563.13367   | 34.74764     | 4.4636  |

**(5*S*,6*R*)-4-ethyl-6-(4-methoxyphenyl)-2-phenyl-2,3-diazaspiro[4.4]nona-3,7-dien-1-one**

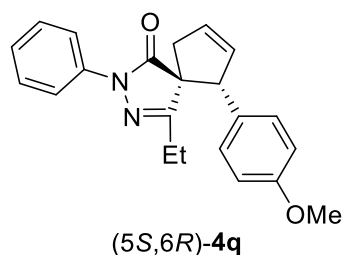

Yellow oil, 23.6 mg, 68% yield, 90% ee, 4:1 dr.  $R_f = 0.41$  (*n*-hexane:EtOAc = 5:1).

$[\alpha]_D^{20} = +29.82$  (*c* 1.0, CHCl<sub>3</sub>).

<sup>1</sup>H NMR (400 MHz, CDCl<sub>3</sub>, ppm):  $\delta$  7.94 (d,  $J = 8.4$  Hz, 2H), 7.41 (t,  $J = 7.6$  Hz, 2H), 7.19 (t,  $J = 7.2$  Hz, 1H), 6.99 (d,  $J = 8.4$  Hz, 2H), 6.76 (d,  $J = 8.8$  Hz, 2H), 6.07-6.02 (m, 1H), 6.01-5.96 (m, 1H), 4.65 (s, 1H), 3.76 (s, 3H), 3.03-2.95 (m, 1H), 2.76-2.68 (m, 1H), 2.18-2.06 (m, 1H), 1.94-1.82 (m, 1H), 0.88 (t,  $J = 7.2$  Hz, 3H).

<sup>13</sup>C NMR (100 MHz, CDCl<sub>3</sub>, ppm):  $\delta$  177.1, 166.9, 159.0, 138.5, 131.6, 130.2, 129.7, 129.0, 128.1, 125.0, 119.0, 114.0, 64.6, 59.6, 55.3, 40.8, 22.4, 9.5.

**HPLC analysis:** Daicel CHIRALPAK AD-H, *n*-hexane:*i*-PrOH = 80:20, flow rate = 1.0 mL/min,  $\lambda = 254$  nm, retention time:  $t_{\text{minor}} = 8.4$  min,  $t_{\text{major}} = 10.9$  min.

**HRMS (ESI)** calcd for C<sub>22</sub>H<sub>23</sub>N<sub>2</sub>O<sub>2</sub> [M + H]<sup>+</sup>: 347.1754, found 347.1756.

**(5*R*,6*S*)-4-ethyl-6-(4-methoxyphenyl)-2-phenyl-2,3-diazaspiro[4.4]nona-3,7-dien-1-one**

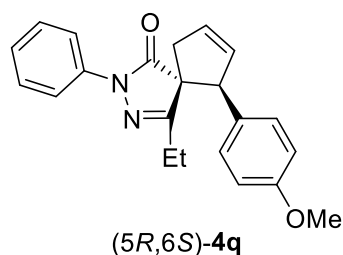

Yellow oil, 21.8 mg, 63% yield, 90% ee.

**HPLC analysis:** Daicel CHIRALPAK AD-H, *n*-hexane:*i*-PrOH = 80:20, flow rate = 1.0 mL/min,  $\lambda = 254$  nm, retention time:  $t_{\text{major}} = 8.4$  min,  $t_{\text{minor}} = 10.9$  min.

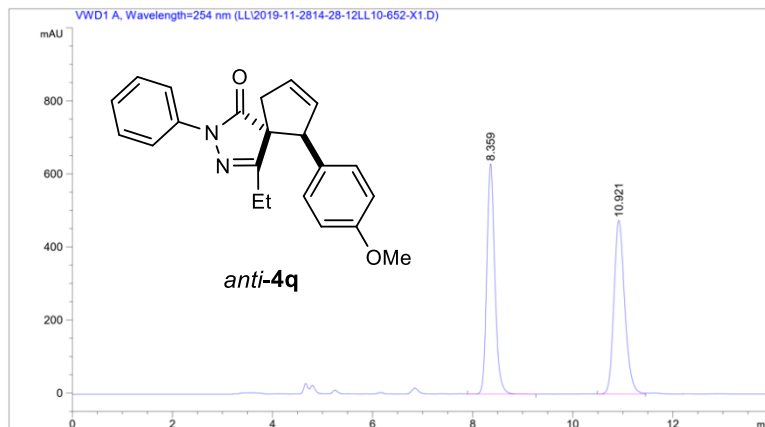

| Peak # | Ret. Time [min] | Type | Width [min] | Area [mAU*s] | Height [mAU] | Area %  |
|--------|-----------------|------|-------------|--------------|--------------|---------|
| 1      | 8.359           | VB R | 0.1704      | 6989.54883   | 630.07062    | 49.4116 |
| 2      | 10.921          | VF   | 0.2306      | 7156.02100   | 475.46106    | 50.5884 |

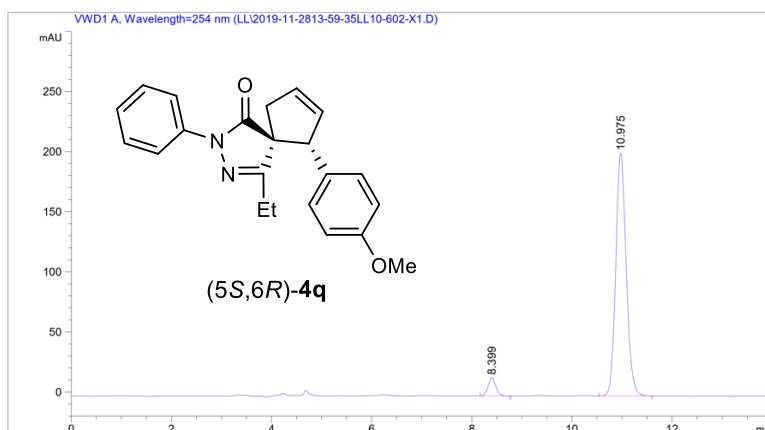

| Peak # | Ret. Time [min] | Type | Width [min] | Area [mAU*s] | Height [mAU] | Area %  |
|--------|-----------------|------|-------------|--------------|--------------|---------|
| 1      | 8.399           | FF   | 0.1640      | 160.09607    | 15.06440     | 5.2021  |
| 2      | 10.975          | FF   | 0.2216      | 2917.44922   | 201.91856    | 94.7979 |

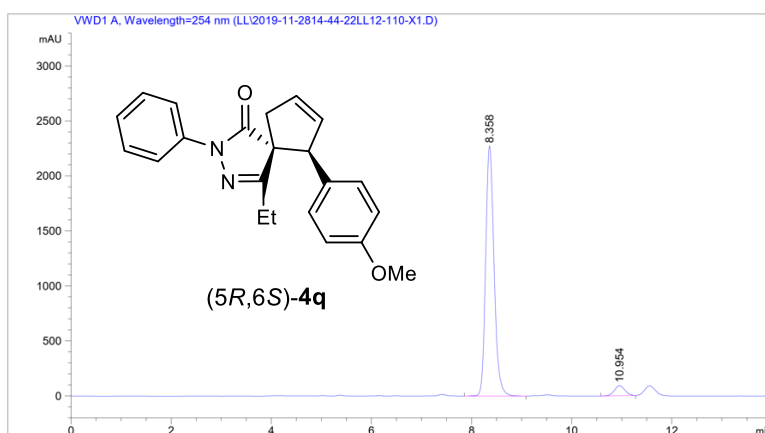

| Peak # | Ret. Time [min] | Type | Width [min] | Area [mAU*s] | Height [mAU] | Area %  |
|--------|-----------------|------|-------------|--------------|--------------|---------|
| 1      | 8.358           | VV   | 0.1800      | 2.65094e4    | 2273.87134   | 95.2212 |
| 2      | 10.954          | VBAR | 0.2243      | 1330.40735   | 91.68713     | 4.7788  |



**(5S,6S)-4-ethyl-6-(4-methoxyphenyl)-2-phenyl-2,3-diazaspiro[4.4]nona-3,7-dien-1-one**  
**-one**

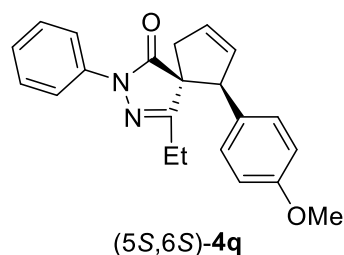

Yellow oil, 9.0 mg, 26% yield, 92% ee.  $R_f = 0.38$  (*n*-hexane:EtOAc = 5:1).  $[\alpha]_D^{20} = -30.09$  (*c* 1.0, CHCl<sub>3</sub>).

<sup>1</sup>H NMR (600 MHz, CDCl<sub>3</sub>, ppm):  $\delta$  7.52 (d,  $J = 7.8$  Hz, 2H), 7.26 (t,  $J = 7.2$  Hz, 2H), 7.07 (t,  $J = 7.2$  Hz, 1H), 7.04 (d,  $J = 9.0$  Hz, 2H), 6.78 (d,  $J = 8.4$  Hz, 2H), 7.04 (d,  $J = 8.4$  Hz, 2H), 6.78 (d,  $J = 9.0$  Hz, 2H), 6.09-6.05 (m, 1H), 5.87-5.83 (m, 1H), 4.30 (s, 1H), 3.74 (s, 3H), 2.98-2.90 (m, 1H), 2.74-2.68 (m, 1H), 2.68-2.59 (m, 1H), 2.56-2.48 (m, 1H), 1.40 (t,  $J = 7.2$  Hz, 3H).

<sup>13</sup>C NMR (150 MHz, CDCl<sub>3</sub>, ppm):  $\delta$  174.3, 166.7, 159.1, 138.1, 131.7, 130.6, 129.4, 129.4, 128.7, 124.7, 119.1, 113.7, 63.1, 58.6, 55.3, 39.5, 21.1, 9.9.

**HPLC analysis:** Daicel CHIRALPAK AD-H, *n*-hexane:*i*-PrOH = 80:20, flow rate = 1.0 mL/min,  $\lambda = 254$  nm, retention time:  $t_{\text{major}} = 8.1$  min,  $t_{\text{minor}} = 15.8$  min.

**HRMS (ESI)** calcd for C<sub>22</sub>H<sub>23</sub>N<sub>2</sub>O<sub>2</sub> [M + H]<sup>+</sup>: 347.1754, found 347.1755.

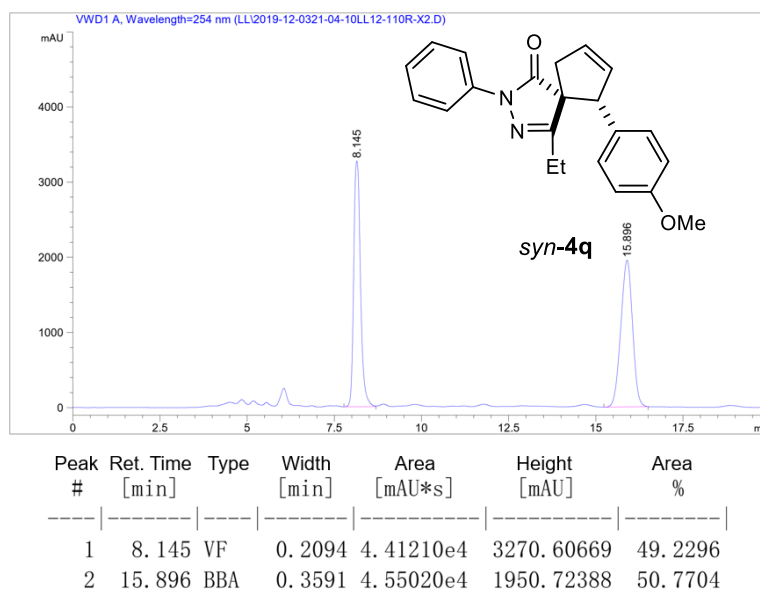

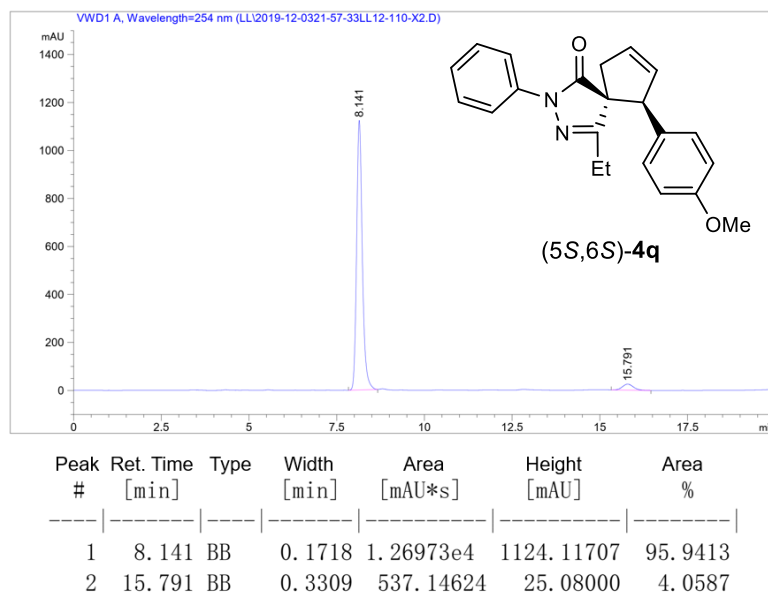

**(5R,6S)-6-([1,1'-biphenyl]-4-yl)-2-(4-bromophenyl)-4-methyl-2,3-diazaspiro[4.4]nona-3,7-dien-1-one**

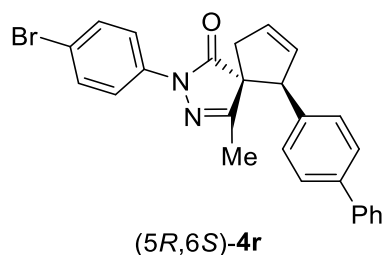

White solid, *m.p.*: 228.0-289.9 mg, 50% yield, 97% ee.  $R_f = 0.33$  (*n*-hexane:EtOAc = 5:1).  $[\alpha]_D^{20} = -57.5455$  (*c* 1.0, CHCl<sub>3</sub>).

<sup>1</sup>H NMR (600 MHz, CDCl<sub>3</sub>, ppm):  $\delta$  7.85 (d, *J* = 7.7 Hz, 2H), 7.55 (d, *J* = 8.8 Hz, 2H), 7.52 (d, *J* = 8.8 Hz, 2H), 7.49 (d, *J* = 8.1 Hz, 2H), 7.42 (t, *J* = 7.5 Hz, 2H), 7.33 (t, *J* = 7.4 Hz, 1H), 7.14 (d, *J* = 8.1 Hz, 2H), 6.15-6.09 (m, 1H), 6.06-5.99 (m, 1H), 4.77-4.71 (m, 1H), 3.08-2.99 (m, 1H), 2.78-2.69 (m, 1H), 1.71 (s, 3H).

<sup>13</sup>C NMR (150 MHz, CDCl<sub>3</sub>, ppm):  $\delta$  176.8, 163.1, 140.6, 140.5, 137.3, 137.0, 132.0, 131.0, 129.7, 128.9, 127.6, 127.5, 127.4, 127.1, 120.4, 117.9, 64.6, 59.7, 40.8, 15.3.

**HPLC analysis:** Daicel CHIRALPAK AD-H, *n*-hexane:*i*-PrOH = 90:10, flow rate = 1.0 mL/min,  $\lambda = 254$  nm, retention time:  $t_{\text{minor}} = 12.3$  min,  $t_{\text{major}} = 17.7$  min.

**HRMS** (ESI) calcd for C<sub>26</sub>H<sub>22</sub>BrN<sub>2</sub>O [M + H]<sup>+</sup>: 457.0910, found 457.0906.

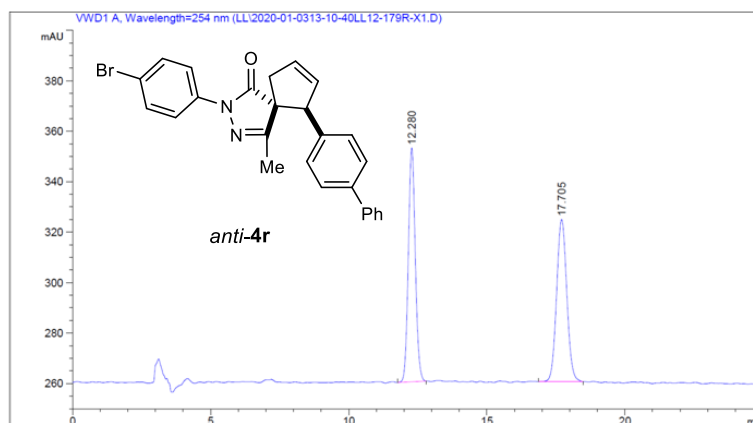

| Peak # | Ret. Time [min] | Type | Width [min] | Area [mAU*s] | Height [mAU] | Area %  |
|--------|-----------------|------|-------------|--------------|--------------|---------|
| 1      | 12.280          | BB   | 0.2698      | 1620.88660   | 92.77139     | 49.5889 |
| 2      | 17.705          | BB   | 0.3990      | 1647.76001   | 64.29202     | 50.4111 |

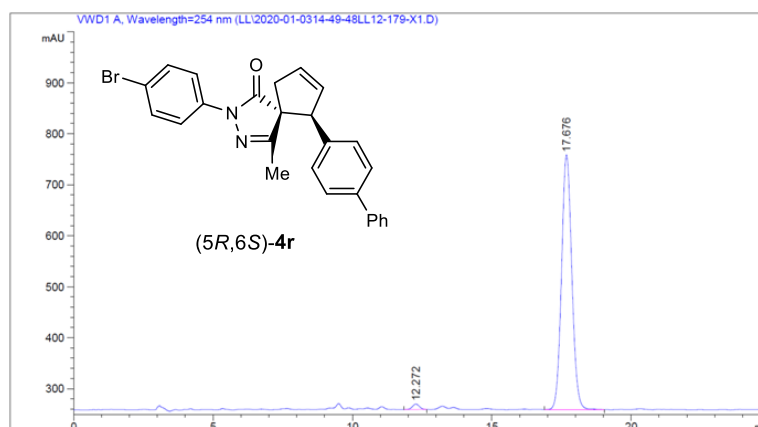

| Peak # | Ret. Time [min] | Type | Width [min] | Area [mAU*s] | Height [mAU] | Area %  |
|--------|-----------------|------|-------------|--------------|--------------|---------|
| 1      | 12.272          | BBA  | 0.2655      | 184.90880    | 10.75889     | 1.4263  |
| 2      | 17.676          | BV R | 0.3955      | 1.27798e4    | 499.49805    | 98.5737 |

**(5*S*,6*S*)-6-([1,1'-biphenyl]-4-yl)-2-(4-bromophenyl)-4-methyl-2,3-diazaspiro[4.4]nona-3,7-dien-1-one**

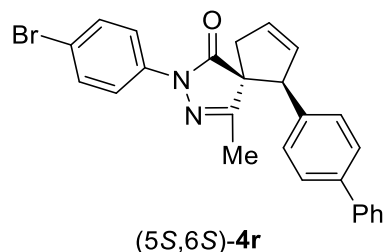

White solid, *m.p.*:188.5-189.4 °C, 14.2 mg, 31% yield, 91% ee.  $R_f = 0.30$  (*n*-hexane:EtOAc = 5:1).  $[\alpha]_D^{20} = -9.0$  (*c* 1.0, CHCl<sub>3</sub>).

<sup>1</sup>H NMR (600 MHz, CDCl<sub>3</sub>, ppm): δ 7.52 (d, *J* = 7.3 Hz, 2H), 7.47 (d, *J* = 8.1 Hz, 2H), 7.41 (d, *J* = 7.5 Hz, 2H), 7.40-7.36 (m, 2H), 7.36-7.31 (m, 3H), 7.17 (d, *J* = 8.1

Hz, 2H), 6.15-6.09 (m, 1H), 5.95-5.89 (m, 1H), 4.41-4.35 (m, 1H), 3.01-2.94 (m, 1H), 2.79-2.71 (m, 1H), 2.28 (s, 3H).

$^{13}\text{C}$  NMR (150 MHz,  $\text{CDCl}_3$ , ppm):  $\delta$  173.9, 163.2, 140.8, 140.7, 136.9, 136.2, 131.7, 131.2, 131.0, 128.9, 128.7, 127.4, 127.2, 127.0, 120.5, 117.6, 63.2, 58.8, 39.4, 13.9.

**HPLC analysis:** Daicel CHIRALPAK AD-H, *n*-hexane:*i*-PrOH = 90:10, flow rate = 1.0 mL/min,  $\lambda$  = 254 nm, retention time:  $t_{\text{major}}$  = 13.2 min,  $t_{\text{minor}}$  = 29.4 min.

**HRMS (ESI) calcd for  $\text{C}_{26}\text{H}_{22}\text{BrN}_2\text{O}$  [ $\text{M} + \text{H}$ ] $^+$ :** 457.0910, found 457.0910.

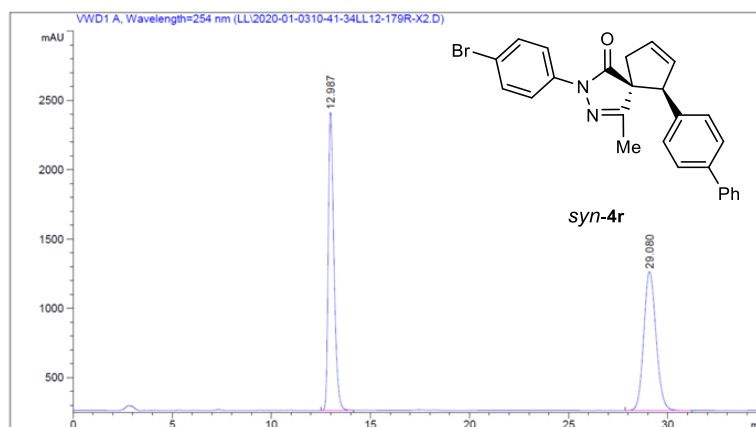

| Peak # | Ret. Time [min] | Type | Width [min] | Area [mAU*s] | Height [mAU] | Area %  |
|--------|-----------------|------|-------------|--------------|--------------|---------|
| 1      | 12.987          | BB   | 0.3032      | 4.28209e4    | 2151.14282   | 49.8414 |
| 2      | 29.080          | BV R | 0.6647      | 4.30934e4    | 1002.05591   | 50.1586 |

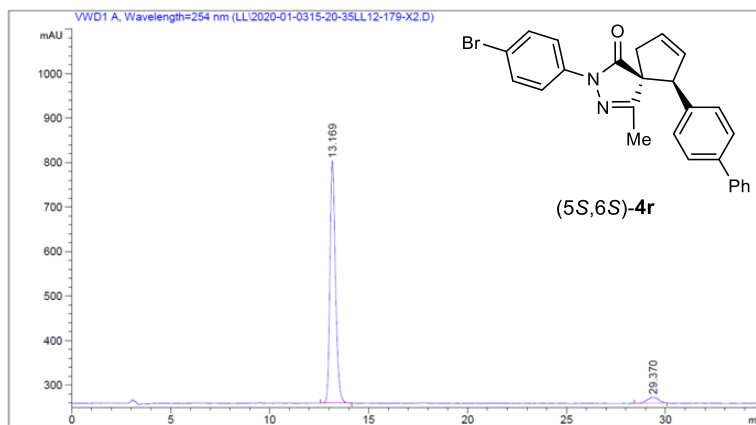

| Peak # | Ret. Time [min] | Type | Width [min] | Area [mAU*s] | Height [mAU] | Area %  |
|--------|-----------------|------|-------------|--------------|--------------|---------|
| 1      | 13.169          | BBA  | 0.2983      | 1.06025e4    | 544.12396    | 95.4512 |
| 2      | 29.370          | BBA  | 0.6336      | 505.26678    | 13.02350     | 4.5488  |

**(5*S*,6*S*)-6-(furan-2-yl)-4-methyl-2-phenyl-2,3-diazaspiro[4.4]nona-3,7-dien-1-one**

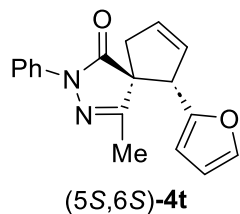

Yellow oil, 19.9 mg, 68% yield, 93% ee, 10:1 dr.  $R_f = 0.30$  (*n*-hexane:EtOAc = 10:1).

$[\alpha]_D^{20} = 33.7$  (*c* 1.0, CHCl<sub>3</sub>).

<sup>1</sup>H NMR (500 MHz, CDCl<sub>3</sub>, ppm):  $\delta$  7.93 (dd,  $J = 8.8$  Hz,  $J = 1.1$  Hz, 2H), 7.43-7.38 (m, 2H), 7.26 (s, 1H), 7.21-7.16 (m, 1H), 6.26 (dd,  $J = 3.1$  Hz,  $J = 1.9$  Hz, 1H), 6.10 (d,  $J = 3.2$  Hz, 1H), 5.99-5.95 (m, 2H), 6.64 (s, 1H), 3.02-2.96 (m, 1H), 2.74-2.67 (m, 1H), 1.77 (s, 3H).

<sup>13</sup>C NMR (125 MHz, CDCl<sub>3</sub>, ppm):  $\delta$  176.0, 162.5, 152.0, 142.3, 138.3, 129.9, 129.4, 1219.0, 125.0, 119.0, 110.4, 106.7, 62.8, 53.4, 40.8, 14.5.

**HPLC analysis:** Daicel CHIRALPAK IA-3, *n*-hexane:*i*-PrOH = 95:5, flow rate = 1.0 mL/min,  $\lambda = 254$  nm, retention time:  $t_{\text{minor}} = 10.6$  min,  $t_{\text{major}} = 16.0$  min.

**HRMS (ESI)** calcd for C<sub>18</sub>H<sub>17</sub>N<sub>2</sub>O<sub>2</sub> [M + H]<sup>+</sup>: 293.1285, found 293.1283.

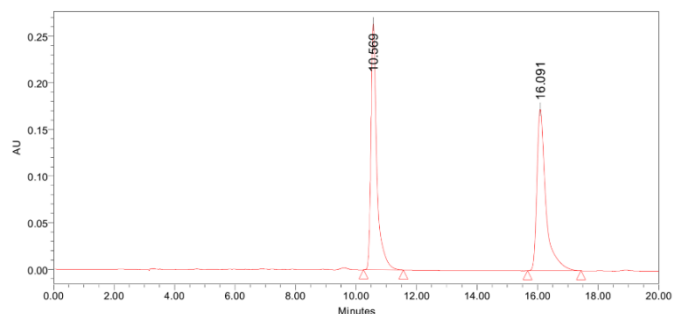

| Name | RT     | Area    | Height | % Area | Peak Width (sec) |
|------|--------|---------|--------|--------|------------------|
| 1    | 10.569 | 3581430 | 263708 | 50.24  | 30.00            |
| 2    | 16.091 | 3547017 | 173183 | 49.76  | 30.00            |

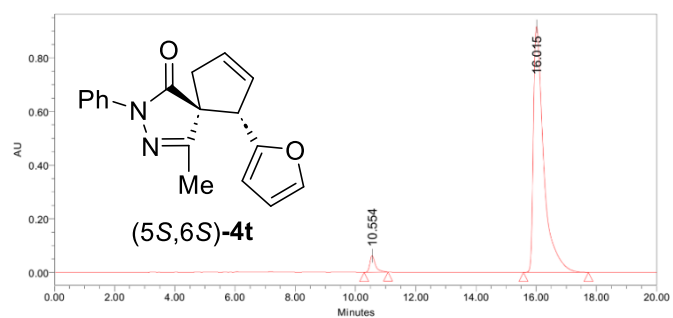

| Name | RT     | Area    | Height | % Area | Peak Width (sec) |
|------|--------|---------|--------|--------|------------------|
| 1    | 10.554 | 803556  | 62084  | 3.57   | 30.00            |
| 2    | 16.015 | 2171728 | 916816 | 96.43  | 30.00            |

**(5*R*,6*R*)-4-methyl-2-phenyl-6-(thiophen-2-yl)-2,3-diazaspiro[4.4]nona-3,7-dien-1-one**

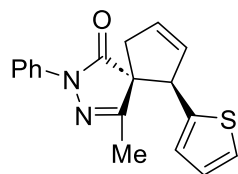

**(5*R*,6*R*)-4u**

White solid, 19.3 mg, 62% yield, 95% ee.  $R_f = 0.31$  (*n*-hexane:EtOAc = 10:1).  $[\alpha]_D^{20} = -46.3$  (*c* 1.0, CHCl<sub>3</sub>).

<sup>1</sup>H NMR (500 MHz, CDCl<sub>3</sub>, ppm):  $\delta$  7.92 (d, *J* = 8.2 Hz, 2H), 7.41 (t, *J* = 7.8 Hz, 2H), 7.24-7.15 (m, 2H), 7.00 (s, 1H), 6.72 (d, *J* = 4.8 Hz, 1H), 6.00 (m, 2H), 4.67 (s, 1H), 3.07-2.94 (m, 1H), 2.75-2.65 (m, 1H), 1.68 (s, 3H).

<sup>13</sup>C NMR (125 MHz, CDCl<sub>3</sub>, ppm):  $\delta$  176.5, 163.0, 138.9, 138.2, 131.5, 129.3, 129.0, 126.6, 126.6, 125.1, 121.0, 118.9, 63.8, 55.3, 40.8, 14.9.

**HPLC analysis:** Daicel CHIRALPAK IA-3, *n*-hexane:*i*-PrOH = 95:5, flow rate = 1.0 mL/min,  $\lambda = 254$  nm, retention time:  $t_{\text{major}} = 10.9$  min,  $t_{\text{minor}} = 17.1$  min.

**HRMS (ESI)** calcd for C<sub>18</sub>H<sub>17</sub>N<sub>2</sub>OS [M + H]<sup>+</sup>: 309.1056, found 309.1052.

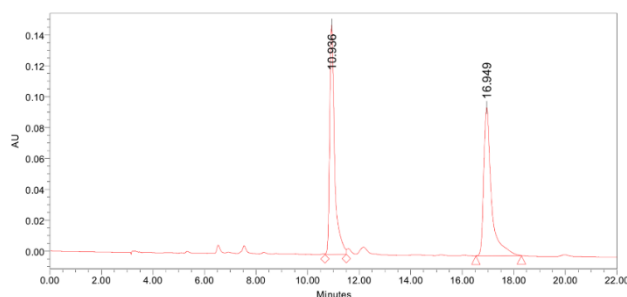

| Name | RT     | Area    | Height | % Area | Peak Width (sec) |
|------|--------|---------|--------|--------|------------------|
| 1    | 10.936 | 1949750 | 148558 | 49.52  | 30.00            |
| 2    | 16.949 | 1987420 | 96031  | 50.48  | 30.00            |

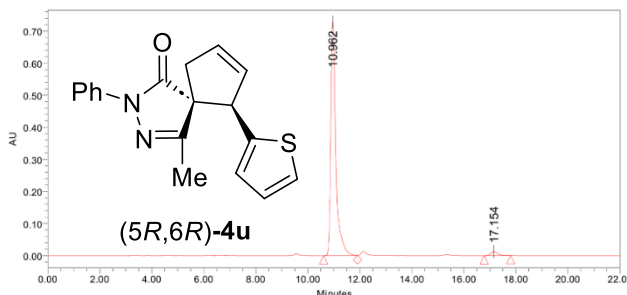

| Name | RT     | Area    | Height | % Area | Peak Width (sec) |
|------|--------|---------|--------|--------|------------------|
| 1    | 10.962 | 9805810 | 728774 | 97.70  | 30.00            |
| 2    | 17.154 | 231239  | 12233  | 2.30   | 30.00            |

**(5*S*,6*R*)-4-methyl-2-phenyl-6-(thiophen-2-yl)-2,3-diazaspiro[4.4]nona-3,7-dien-1-one**

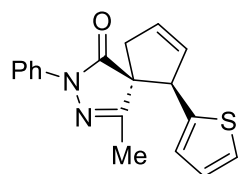

**(5*S*,6*R*)-4u**

White solid, 6.8mg, 22% yield, 96% ee.  $R_f = 0.28$  (*n*-hexane:EtOAc = 10:1).  $[\alpha]_D^{20} = -40.1$  (*c* 1.0, CHCl<sub>3</sub>).

<sup>1</sup>H NMR (500 MHz, CDCl<sub>3</sub>, ppm):  $\delta$  7.58-7.50 (m, 2H), 7.32-7.26 (m, 2H), 7.22-7.18 (m, 1H), 7.13-7.07 (m, 1H), 7.06-7.03 (m, 1H), 6.09-6.03 (m, 1H), 5.95-5.87 (m, 1H), 4.42-4.37 (m, 1H), 2.99-2.92 (m, 1H), 2.75-2.67 (m, 1H), 2.23 (s, 3H).

<sup>13</sup>C NMR (125 MHz, CDCl<sub>3</sub>, ppm):  $\delta$  173.9, 162.7, 138.2, 137.9, 131.3, 130.5, 128.8, 127.6, 125.6, 124.9, 122.6, 119.1, 62.6, 54.0, 39.3, 13.9.

**HPLC analysis:** Daicel CHIRALPAK IA-3, *n*-hexane:*i*-PrOH = 95:5, flow rate = 1.0 mL/min,  $\lambda = 254$  nm, retention time:  $t_{\text{major}} = 14.1$  min,  $t_{\text{minor}} = 17.5$  min.

**HRMS (ESI)** calcd for C<sub>18</sub>H<sub>17</sub>N<sub>2</sub>OS [M + H]<sup>+</sup>: 309.1056, found 309.1053.

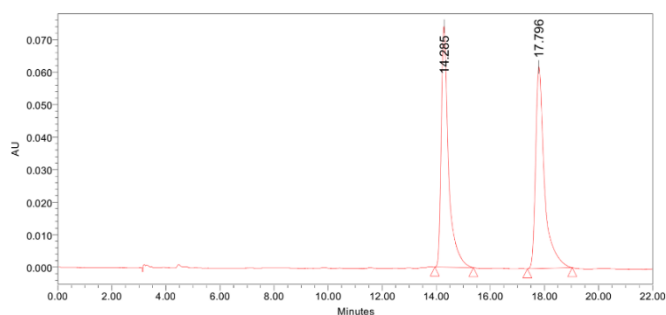

| Name | RT     | Area    | Height | % Area | Peak Width (sec) |
|------|--------|---------|--------|--------|------------------|
| 1    | 14.285 | 1373095 | 74161  | 49.37  | 30.00            |
| 2    | 17.796 | 1408312 | 62002  | 50.63  | 30.00            |

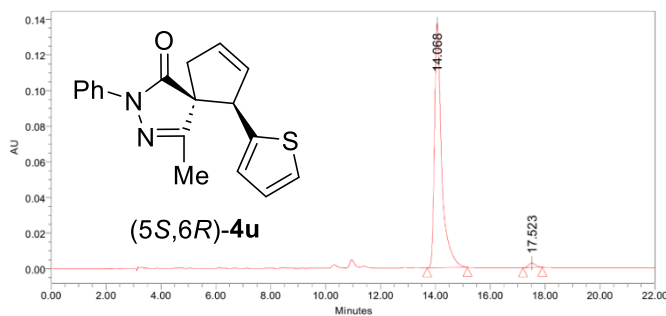

| Name | RT     | Area    | Height | % Area | Peak Width (sec) |
|------|--------|---------|--------|--------|------------------|
| 1    | 14.068 | 2496370 | 137044 | 98.27  | 30.00            |
| 2    | 17.523 | 44024   | 2512   | 1.73   | 30.00            |

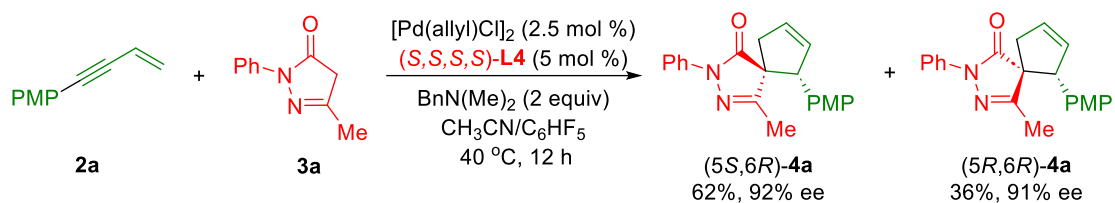

**(5*S*,6*R*)-6-(4-methoxyphenyl)-4-methyl-2-phenyl-2,3-diazaspiro[4.4]nona-3,7-die**

**n-1-one**

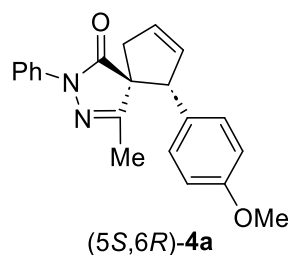

Yellow oil, 20.6 mg, 62% yield, 92% ee.

**HPLC analysis:** Daicel CHIRALPAK AD-H, *n*-hexane:*i*-PrOH = 80:20, flow rate = 1.1 mL/min,  $\lambda = 254\text{ nm}$ , retention time:  $t_{\text{minor}} = 8.7\text{ min}$ .  $t_{\text{major}} = 10.1\text{ min}$ ,

**(5*R*,6*R*)-6-(4-methoxyphenyl)-4-methyl-2-phenyl-2,3-diazaspiro[4.4]nona-3,7-die**

**n-1-one**

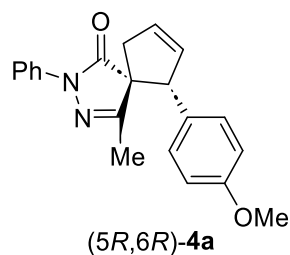

Yellow oil, 12 mg, 36% yield, 91% ee.

**HPLC analysis:** Daicel CHIRALPAK AD-H, *n*-hexane:*i*-PrOH = 80:20, flow rate = 1.1 mL/min,  $\lambda = 254\text{ nm}$ , retention time:  $t_{\text{minor}} = 7.5\text{ min}$ ,  $t_{\text{major}} = 14.9\text{ min}$ .



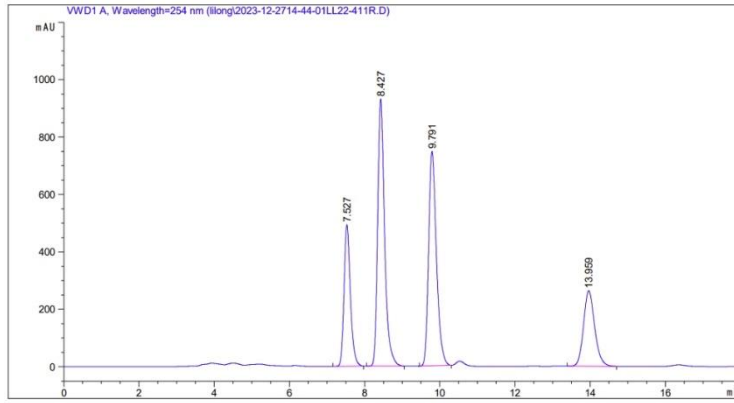

| Peak # | RetTime [min] | Type | Width [min] | Area [mAU*s] | Height [mAU] | Area %  |
|--------|---------------|------|-------------|--------------|--------------|---------|
| 1      | 7.527         | BBA  | 0.1785      | 5764.97803   | 492.58981    | 17.0577 |
| 2      | 8.427         | BBA  | 0.1924      | 1.18396e4    | 930.53345    | 33.0316 |
| 3      | 9.791         | BB   | 0.2201      | 1.07698e4    | 747.29089    | 33.8663 |
| 4      | 13.959        | BBA  | 0.3165      | 5422.50635   | 263.01965    | 16.0444 |

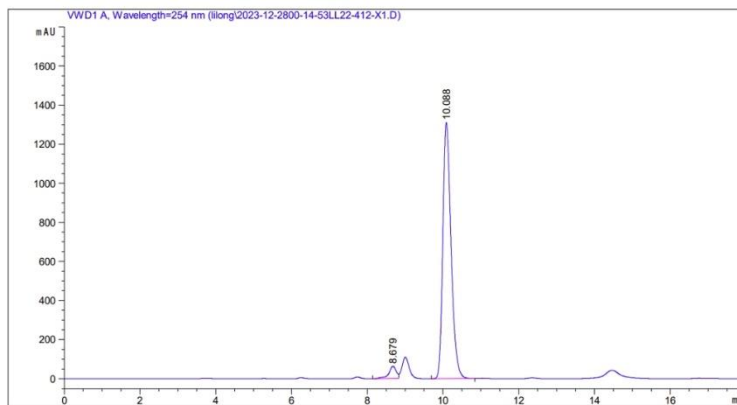

| Peak # | RetTime [min] | Type | Width [min] | Area [mAU*s] | Height [mAU] | Area %  |
|--------|---------------|------|-------------|--------------|--------------|---------|
| 1      | 8.679         | BV   | 0.2018      | 863.50537    | 63.05351     | 4.2044  |
| 2      | 10.088        | BB   | 0.2293      | 1.96746e4    | 1309.56519   | 95.7956 |

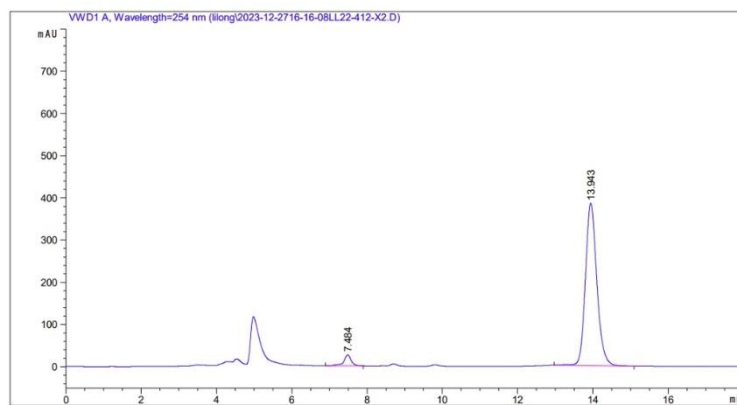

| Peak # | RetTime [min] | Type | Width [min] | Area [mAU*s] | Height [mAU] | Area %  |
|--------|---------------|------|-------------|--------------|--------------|---------|
| 1      | 7.484         | BBA  | 0.2029      | 368.17786    | 26.37399     | 4.3365  |
| 2      | 13.943        | HB   | 0.3240      | 8121.97949   | 385.18732    | 95.6635 |

## 5. Application in Asymmetric Catalysis

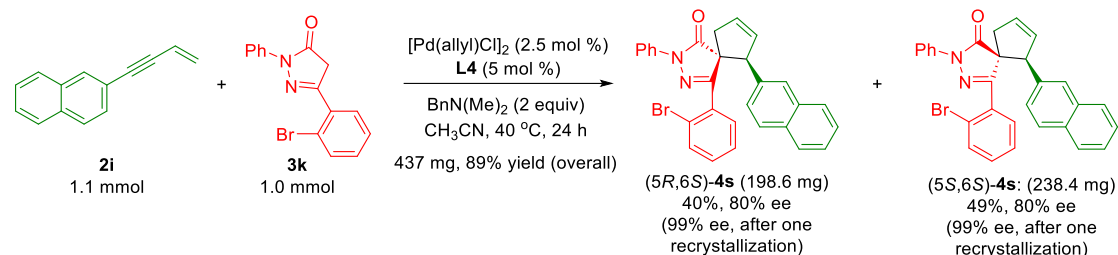

In an Ar-filled glovebox, dissolving the [Pd(allyl)Cl]<sub>2</sub> (9.1 mg, 2.5 mol %), and **L4** (37 mg, 5 mol %) in CH<sub>3</sub>CN (5 mL, 0.2 M) was stirred for 15 min at room temperature. Subsequently, conjugated enyne **2i** (1.1 mmol, 1.1 equiv), **3k** (1 mmol, 1 equiv), and BnN(Me)<sub>2</sub> (2 equiv, 300 μL) were added. The reaction mixture was stirred at 40 °C for 24 h outside the glove box. The solution was concentrated in vacuo and the crude product was purified by column chromatography on silica gel (*n*-hexane:EtOAc = 20:1 to 5:1) to afford the pyrazolone-derived spiro product (*5R,6S*)-**4s** (199.6 mg) and (*5S,6S*)-**4s** (238.4 mg).

The above-obtained product (*5R,6S*)-**4s** (199.6 mg, 80% ee) was dissolved in CH<sub>2</sub>Cl<sub>2</sub> (3 mL), followed by addition of *n*-hexane (9 mL). The mixed solution was stood at room temperature (about 3 days), until the enantiomeric excess of mother liquor reached 99% upon inspection by chiral HPLC analysis. Then the racemic crystal was separated from the solution by filtration, the mother liquor was collected to afford the enantioenriched product (*5R,6S*)-**4s** (158mg, 99% ee).

The above-obtained product (*5S,6S*)-**4s** (238.4 mg, 80% ee) was dissolved in CH<sub>2</sub>Cl<sub>2</sub> (3 mL), followed by addition of *n*-hexane (9 mL). The mixed solution was stood at 0 °C (about 5 days), until the enantiomeric excess of mother liquor reached 99% upon inspection by chiral HPLC analysis. Then the racemic crystal was separated from the solution by filtration, the mother liquor was collected to afford the enantioenriched product (*5S,6S*)-**4s** (155mg, 99% ee).

**(5R,6S)-4-(2-bromophenyl)-6-(naphthalen-2-yl)-2-phenyl-2,3-diazaspiro[4.4]nona-3,7-dien-1-one**

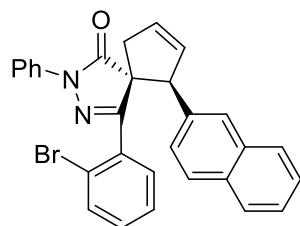

(5R,6S)-4s

White solid, 198.6 mg, 40% yield, 80% ee, 99% ee after one recrystallization.  $R_f = 0.32$  (*n*-hexane:EtOAc = 5:1).  $[\alpha]_D^{20} = -35.3$  (*c* 1.0, CHCl<sub>3</sub>).

<sup>1</sup>H NMR (400 MHz, CDCl<sub>3</sub>, ppm):  $\delta$  8.04 (d, *J* = 7.7 Hz, 2H), 7.68 (d, *J* = 7.7 Hz, 1H), 7.50 (d, *J* = 8.4 Hz, 1H), 7.48-7.31 (m, 5H), 7.27-7.17 (m, 2H), 7.14 (s, 1H), 7.12-7.01 (m, 2H), 7.00-6.93 (m, 1H), 6.92-6.86 (m, 1H), 6.15-6.02 (m, 2H), 4.98-4.87 (m, 1H), 3.48-3.17 (m, 2H).

<sup>13</sup>C NMR (100 MHz, CDCl<sub>3</sub>, ppm):  $\delta$  177.0, 159.4, 138.2, 134.7, 133.3, 132.9, 131.9, 130.1, 129.6, 129.1, 128.4, 127.7, 127.5, 126.5, 126.3, 126.0, 125.8, 125.8, 125.5, 123.5, 119.3, 64.8, 60.3, 44.2.

**HPLC analysis:** Daicel CHIRALPAK AD-H, *n*-hexane:*i*-PrOH = 80:20, flow rate = 1.0 mL/min,  $\lambda = 254$  nm, retention time:  $t_{\text{major}} = 10.4$  min,  $t_{\text{minor}} = 18.0$  min.

**HRMS (ESI)** calcd for C<sub>29</sub>H<sub>21</sub>BrN<sub>2</sub>O [M + H]<sup>+</sup>: 493.0910, found 493.0911.

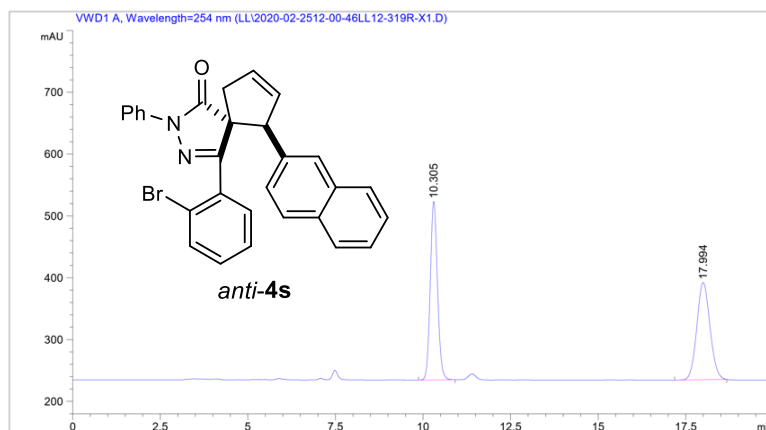

| Peak # | Ret. Time [min] | Type | Width [min] | Area [mAU*s] | Height [mAU] | Area %  |
|--------|-----------------|------|-------------|--------------|--------------|---------|
| 1      | 10.305          | BB   | 0.2210      | 4133.73242   | 288.82712    | 50.1628 |
| 2      | 17.994          | BBA  | 0.4055      | 4106.89990   | 157.32948    | 49.8372 |

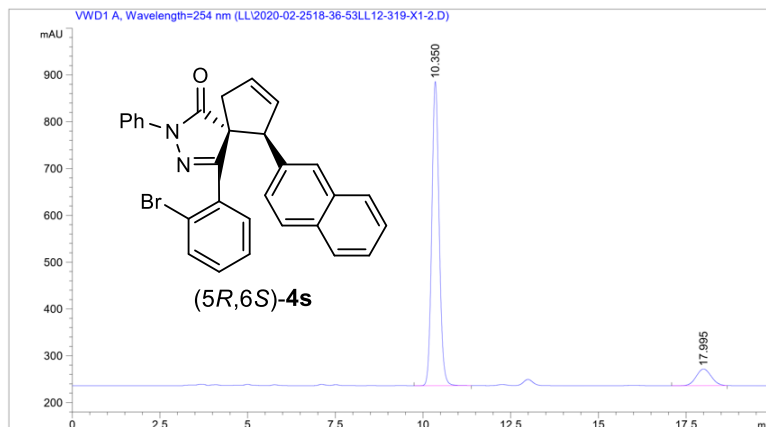

| Peak # | Ret. Time [min] | Type | Width [min] | Area [mAU*s] | Height [mAU] | Area %  |
|--------|-----------------|------|-------------|--------------|--------------|---------|
| 1      | 10.350          | BB   | 0.2248      | 9457.68945   | 649.76111    | 89.9866 |
| 2      | 17.995          | BBA  | 0.4656      | 1052.42029   | 35.42489     | 10.0134 |

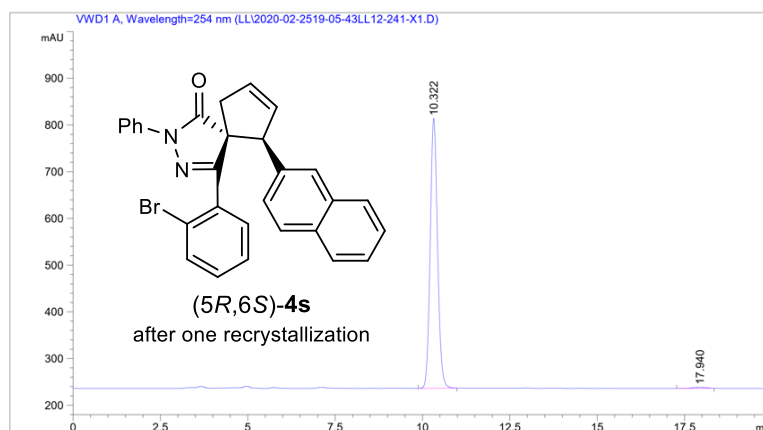

| Peak # | Ret. Time [min] | Type | Width [min] | Area [mAU*s] | Height [mAU] | Area %  |
|--------|-----------------|------|-------------|--------------|--------------|---------|
| 1      | 10.322          | BBA  | 0.2239      | 8409.06348   | 577.47101    | 99.3739 |
| 2      | 17.940          | BBA  | 0.4244      | 52.97989     | 1.91697      | 0.6261  |

**(5S,6S)-4-(2-bromophenyl)-6-(naphthalen-2-yl)-2-phenyl-2,3-diazaspiro[4.4]**

**nona-3,7-dien-1-one**

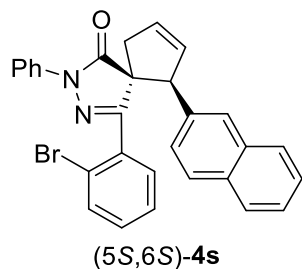

White solid, 238.4 mg, 49% yield, 80% ee, 99% ee after one recrystallization.  $R_f = 0.30$  (*n*-hexane:EtOAc = 5:1).  $[\alpha]_D^{20} = -27.3$  (*c* 1.0, CHCl<sub>3</sub>).

<sup>1</sup>H NMR (400 MHz, CDCl<sub>3</sub>, ppm):  $\delta$  7.82-7.69 (m, 5H), 7.66-7.59 (m, 2H), 7.47-7.37

(m, 5H), 7.37-7.29 (m, 2H), 7.17 (t,  $J = 7.6$  Hz, 2H), 7.02 (t,  $J = 7.4$  Hz, 1H), 6.14-6.00 (m, 1H), 5.93-5.79 (m, 1H), 4.94-4.81 (m, 1H), 3.23-3.00 (m, 2H).

$^{13}\text{C}$  NMR (100 MHz,  $\text{CDCl}_3$ , ppm):  $\delta$  173.7, 161.0, 137.5, 135.0, 134.7, 133.2, 133.0, 131.9, 131.2, 131.1, 130.4, 128.7, 128.1, 127.9, 127.7, 127.5, 127.4, 126.6, 126.1, 125.9, 125.5, 123.8, 119.5, 63.9, 58.7, 40.8.

**HPLC analysis:** Daicel CHIRALPAK AD-H,  $n$ -hexane: $i$ -PrOH = 80:20, flow rate = 1.0 mL/min,  $\lambda = 254$  nm, retention time:  $t_{\text{minor}} = 20.1$  min,  $t_{\text{major}} = 21.9$  min.

**HRMS (ESI)** calcd for  $\text{C}_{29}\text{H}_{21}\text{BrN}_2\text{O}$  [ $\text{M} + \text{H}$ ] $^+$ : 493.0910, found 493.0913.

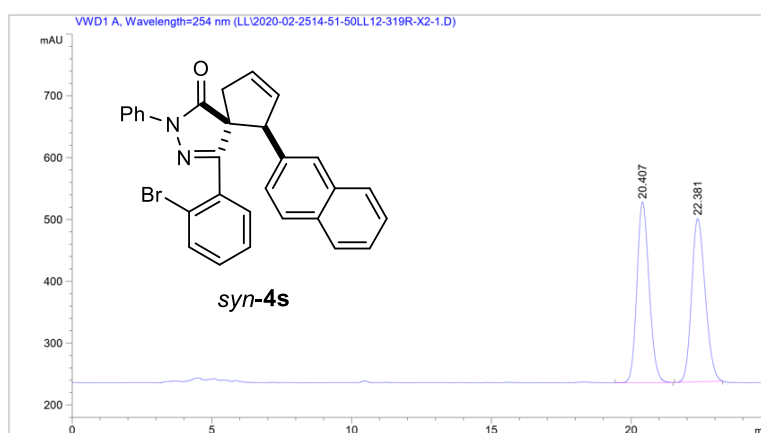

| Peak # | Ret. Time [min] | Type | Width [min] | Area [mAU*s] | Height [mAU] | Area %  |
|--------|-----------------|------|-------------|--------------|--------------|---------|
| 1      | 20.407          | BB   | 0.4705      | 8857.78809   | 292.33295    | 49.8070 |
| 2      | 22.381          | BBA  | 0.5216      | 8926.43652   | 263.91544    | 50.1930 |

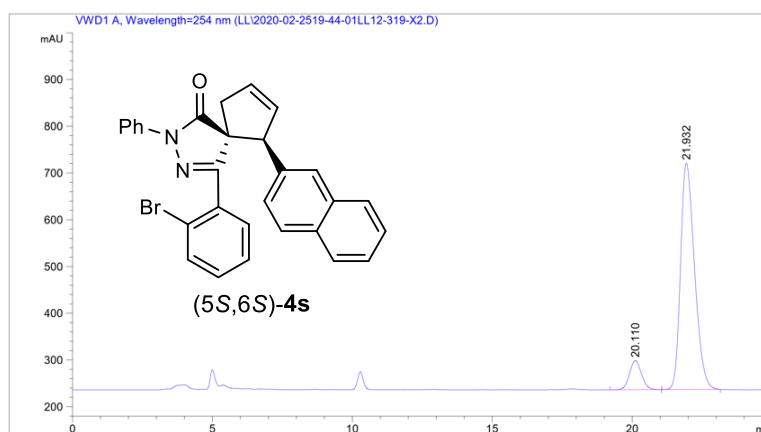

| Peak # | Ret. Time [min] | Type | Width [min] | Area [mAU*s] | Height [mAU] | Area %  |
|--------|-----------------|------|-------------|--------------|--------------|---------|
| 1      | 20.110          | BB   | 0.4599      | 1855.79846   | 62.41451     | 9.9577  |
| 2      | 21.932          | BBA  | 0.5350      | 1.67810e4    | 484.60211    | 90.0423 |

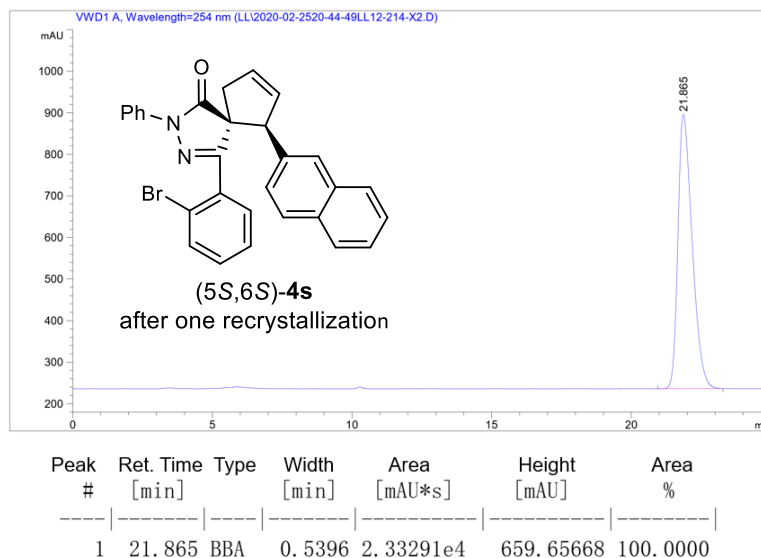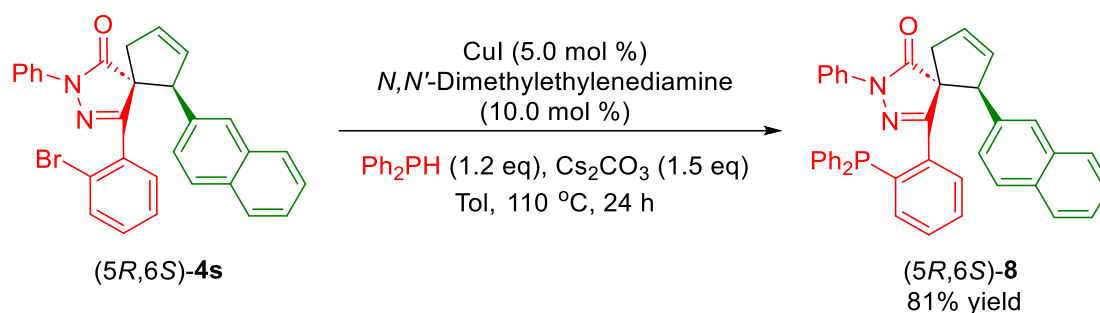

A solution of CuI (3.8 mg, 0.02 mmol), *N,N'*-dimethylethylenediamine (3.5  $\mu\text{L}$ , 0.04 mmol) and diphenylphosphane (83.5  $\mu\text{L}$ , 0.58 mmol) in 2 mL dry toluene was stirred at room temperature for 20 min.  $\text{Cs}_2\text{CO}_3$  (196 mg, 0.6 mmol) and  $(5R,6S)\text{-4s}$  (199 mg, 0.40 mmol; 0.1 M in dry toluene) were added and the mixture was heated to 110  $^\circ\text{C}$  for 24 h under an Ar atmosphere. The reaction mixture was cooled to room temperature, filtered and concentrated. Column chromatography of the residue (n-hexanes:EtOAc = 10:1) provided  $(5R,6S)\text{-8}$  (194 mg) as white solid.

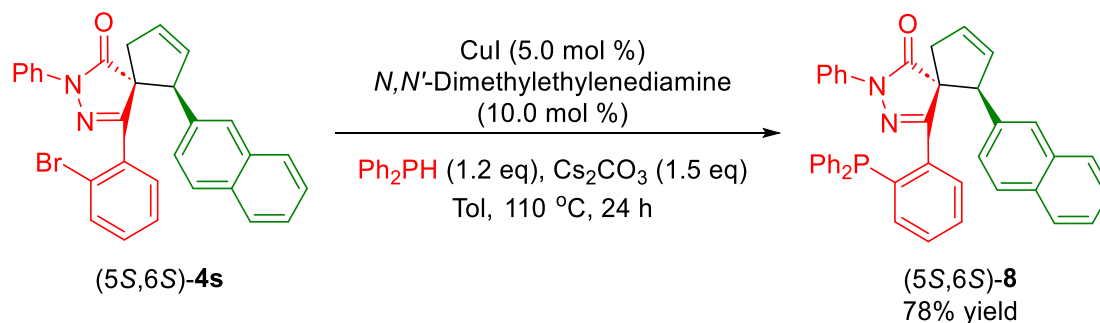

A solution of CuI (4.6 mg, 0.024 mmol), *N,N'*-dimethylethylenediamine (4.2  $\mu\text{L}$ , 0.048 mmol) and diphenylphosphane (107  $\mu\text{L}$ , 1.31 mmol) in 2 mL dry toluene was

stirred at room temperature for 20 min. Cs<sub>2</sub>CO<sub>3</sub> (235 mg, 0.72 mmol) and (5*S*,6*S*)-**4s** (238 mg, 0.48 mmol; 0.1 M in dry toluene) were added and the mixture was heated to 110 °C for 24 h under an Ar atmosphere. The reaction mixture was cooled to room temperature, filtered and concentrated. Column chromatography of the residue (*n*-hexane:EtOAc = 10:1 to 5:1) provided (5*S*,6*S*)-**8** (224mg) as white solid.

**(5*R*,6*S*)-4-(2-bromophenyl)-6-(naphthalen-2-yl)-2-phenyl-2,3-diazaspiro[4.4]nona-3,7-dien-1-one**

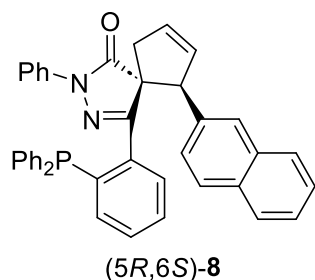

White solid, 81% yield.  $R_f = 0.34$  (*n*-hexane:EtOAc = 5:1).  $[\alpha]_D^{20} = -40.2$  ( $c$  1.0, CHCl<sub>3</sub>).

<sup>1</sup>H NMR (400 MHz, CDCl<sub>3</sub>, ppm):  $\delta$  7.82-7.71 (m, 2H), 7.57-7.51 (m, 1H), 7.48-7.41 (m, 4H), 7.38-7.06 (m, 12H), 7.05-6.92 (m, 6H), 6.57-6.48 (m, 1H), 6.32-6.13 (m, 4H), 5.06-5.00 (m, 1H), 3.52-3.23 (m, 2H).

<sup>13</sup>C NMR (100 MHz, CDCl<sub>3</sub>, ppm):  $\delta$  178.1, 159.6, 138.1, 137.5, 137.3, 136.1, 135.9, 135.8, 135.1, 133.9, 133.7, 133.6, 133.5, 133.3, 133.0, 128.9, 128.8, 128.8, 128.7, 128.4, 128.2, 128.12, 128.0, 127.9, 127.9, 127.8, 127.6, 127.4, 126.7, 126.3, 126.1, 125.7, 125.0, 119.1, 63.5, 63.5, 61.5, 61.5, 45.2.

<sup>31</sup>P NMR (162 MHz, CDCl<sub>3</sub>, ppm):  $\delta$  6.4 (s, 1P, C<sub>3</sub>P).

HRMS (ESI) calcd for C<sub>41</sub>H<sub>31</sub>N<sub>2</sub>OP [M + H]<sup>+</sup>: 599.2247, found 599.2244.

**(5*S*,6*S*)-4-(2-bromophenyl)-6-(naphthalen-2-yl)-2-phenyl-2,3-diazaspiro[4.4]nona-3,7-dien-1-one**

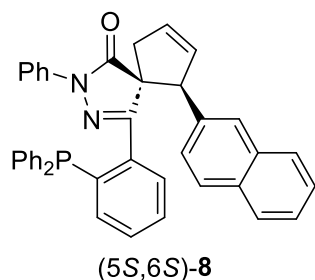

White solid, 78% yield.  $R_f = 0.32$  (*n*-hexane:EtOAc = 5:1).  $[\alpha]_D^{20} = -39.8$  (*c* 1.0, CHCl<sub>3</sub>).

<sup>1</sup>H NMR (400 MHz, CDCl<sub>3</sub>, ppm):  $\delta$  7.81-7.62 (m, 4H), 7.59 (d, *J* = 8.4 Hz, 1H), 7.41 (t, *J* = 7.4 Hz, 1H), 7.38-7.24 (m, 13H), 7.21-7.13 (m, 2H), 6.98-6.82 (m, 5H), 6.23-6.11 (m, 1H), 6.08-5.96 (m, 1H), 4.99-4.89 (m, 1H), 3.32-3.15 (m, 2H).

<sup>13</sup>C NMR (100 MHz, CDCl<sub>3</sub>, ppm):  $\delta$  174.3, 160.1, 138.8, 138.7, 138.7, 138.6, 137.3, 136.2, 135.4, 135.0, 134.8, 134.1, 134.1, 133.9, 133.9, 133.1, 132.7, 131.5, 131.3, 129.5, 128.6, 128.5, 128.5, 128.4, 128.2, 128.0, 127.8, 127.7, 127.7, 127.5, 127.0, 126.4, 125.9, 125.7, 124.6, 119.0, 62.3, 60.2, 42.8.

<sup>31</sup>P NMR (162 MHz, CDCl<sub>3</sub>, ppm):  $\delta$  4.8 (s, 1P, C<sub>3</sub>P).

HRMS (ESI) calcd for C<sub>41</sub>H<sub>31</sub>N<sub>2</sub>OP [M + H]<sup>+</sup>: 599.2247, found 599.2249.

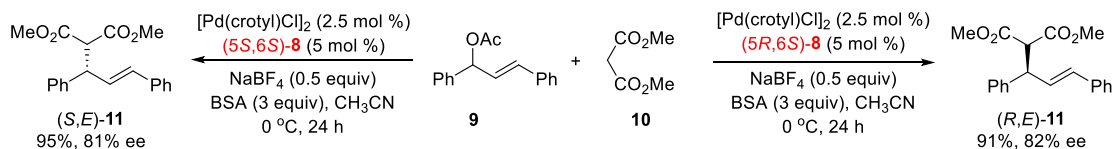

Dissolving the [Pd(crotyl)Cl]<sub>2</sub> (0.5 mg, 2.5 mol %), and (5*R*,6*S*)-**8** or (5*S*,6*S*)-**8** (3.0 mg, 5 mol %) in CH<sub>3</sub>CN (0.5 mL) was stirred for 15 min at room temperature. Subsequently, NaBF<sub>4</sub> (2.7 mg, 0.5 equiv), malonate **10** (0.15 mmol, 3 equiv) were added and cooled to 0 °C before allylic ester **9** (0.05 mmol, 1 equiv) were added. The reaction mixture was stirred at at 0 °C for 24 h. The solution was concentrated in vacuo and the crude product was purified by column chromatography on silica gel (*n*-hexane:EtOAc = 95:5) to afford product (*R*)-**11** or (*S*)-**11**.

### Dimethyl (*R,E*)-2-(1,3-diphenylallyl)malonate



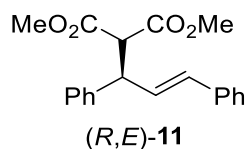

Colorless oil, 91% yield, 82% ee.  $R_f = 0.50$  (*n*-hexane:EtOAc = 20:1).

$^1\text{H NMR}$  (400 MHz,  $\text{CDCl}_3$ , ppm):  $\delta$  7.36-7.16 (m, 10H), 6.48 (d,  $J = 15.8$  Hz, 1H), 6.33 (dd,  $^1J = 8.6$  Hz,  $^2J = 15.7$  Hz, 1H), 4.26 (t,  $J = 8.7$  Hz, 1H), 3.96 (d,  $J = 10.9$  Hz, 1H), 3.70 (s, 3H), 3.52 (s, 3H).

$^{13}\text{C NMR}$  (100 MHz,  $\text{CDCl}_3$ , ppm):  $\delta$  168.2, 167.8, 140.2, 136.8, 131.9, 129.1, 128.7, 128.5, 127.9, 127.6, 127.2, 126.4, 57.7, 52.6, 52.5, 49.2.

**HPLC analysis:** Daicel CHIRALPAK AD-H, *n*-hexane:*i*-PrOH = 80:20, flow rate = 1.0 mL/min,  $\lambda = 254$  nm, retention time:  $t_{\text{minor}} = 9.1$  min,  $t_{\text{major}} = 12.3$  min.

**HRMS** (ESI) calcd for  $\text{C}_{20}\text{H}_{20}\text{O}_4\text{Na}$   $[\text{M} + \text{Na}]^+$ : 347.1254, found 347.1253.

#### Dimethyl (*S,E*)-2-(1,3-diphenylallyl)malonate

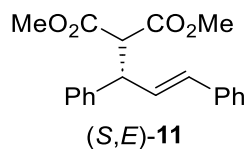

Colorless oil, 95% yield, 81% ee.

**HPLC analysis:** Daicel CHIRALPAK AD-H, *n*-hexane:*i*-PrOH = 80:20, flow rate = 1.0 mL/min,  $\lambda = 254$  nm, retention time:  $t_{\text{major}} = 9.1$  min,  $t_{\text{minor}} = 12.3$  min.

**HRMS** (ESI) calcd for  $\text{C}_{20}\text{H}_{20}\text{O}_4\text{Na}$   $[\text{M} + \text{Na}]^+$ : 347.1253, found 347.1254.

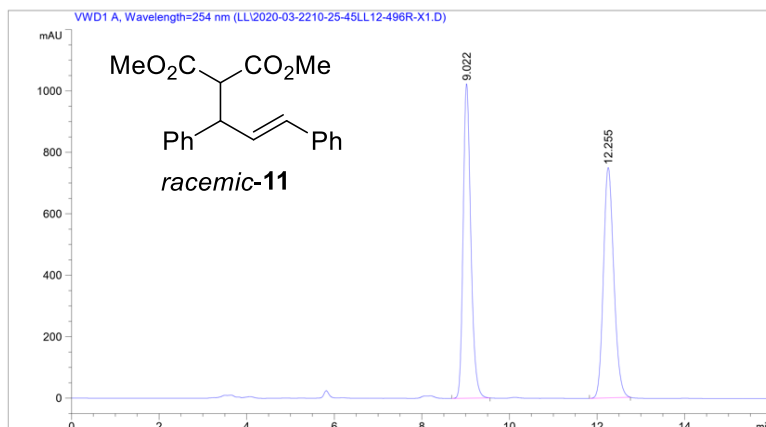

| Peak # | Ret. Time [min] | Type | Width [min] | Area [mAU*s] | Height [mAU] | Area %  |
|--------|-----------------|------|-------------|--------------|--------------|---------|
| 1      | 9.022           | BBA  | 0.1869      | 1.24522e4    | 1023.56781   | 50.1915 |
| 2      | 12.255          | BBA  | 0.2542      | 1.23572e4    | 749.99780    | 49.8085 |

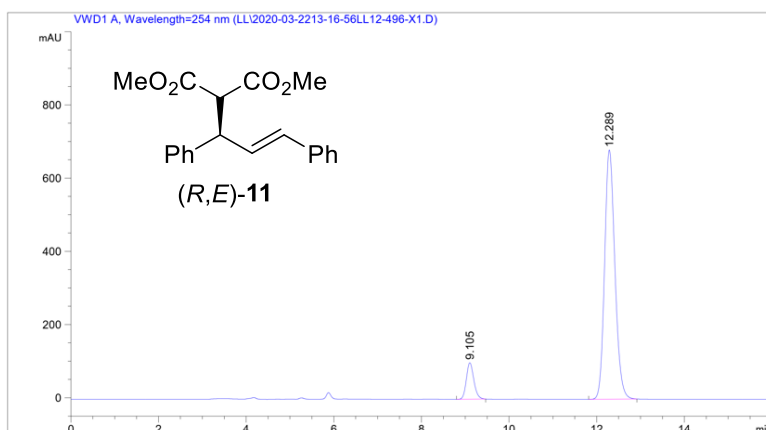

| Peak # | Ret. Time [min] | Type | Width [min] | Area [mAU*s] | Height [mAU] | Area %  |
|--------|-----------------|------|-------------|--------------|--------------|---------|
| 1      | 9.105           | BBA  | 0.1822      | 1179.24683   | 99.52358     | 9.6039  |
| 2      | 12.289          | BBA  | 0.2512      | 1.10996e4    | 680.73932    | 90.3961 |

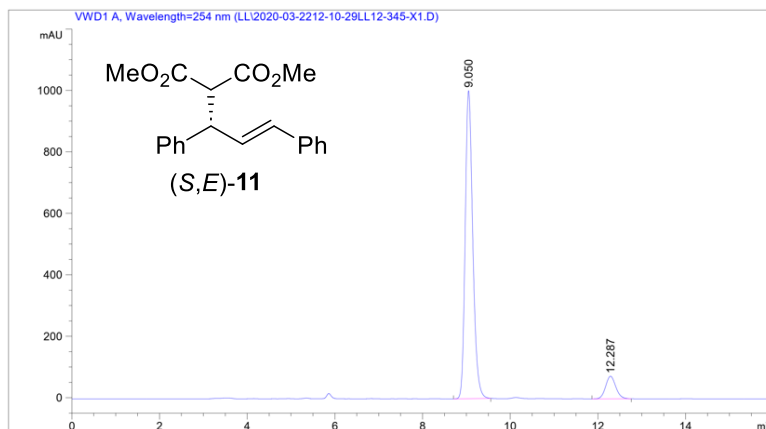

| Peak # | Ret. Time [min] | Type | Width [min] | Area [mAU*s] | Height [mAU] | Area %  |
|--------|-----------------|------|-------------|--------------|--------------|---------|
| 1      | 9.050           | BBA  | 0.1836      | 1.19911e4    | 1002.01477   | 91.0151 |
| 2      | 12.287          | BBA  | 0.2491      | 1183.74219   | 73.42167     | 8.9849  |

## 6. The Assignment of Structure and Configuration

### 5.1 Assignment of Absolute Configuration for Product (5*R*,6*S*)-4r

Crystal data for (5*R*,6*S*)-4r: C<sub>26</sub>H<sub>21</sub>BrN<sub>2</sub>O,  $M = 457.36$ ,  $a = 8.6954(2) \text{ \AA}$ ,  $b = 14.0748(3) \text{ \AA}$ ,  $c = 16.9937(4) \text{ \AA}$ ,  $\alpha = 90^\circ$ ,  $\beta = 90^\circ$ ,  $\gamma = 90^\circ$ ,  $V = 2079.79(8) \text{ \AA}^3$ ,  $T = 100.(2) \text{ K}$ , space group  $P2_12_12_1$ ,  $Z = 4$ ,  $\mu(\text{Cu K}\alpha) = 2.847 \text{ mm}^{-1}$ , 21873 reflections measured, 4446 independent reflections ( $R_{int} = 0.0367$ ). The final  $R_I$  values were 0.0224 ( $I > 2\sigma(I)$ ). The final  $wR(F^2)$  values were 0.0563 ( $I > 2\sigma(I)$ ). The final  $R_I$  values were 0.0225 (all data). The final  $wR(F^2)$  values were 0.0564 (all data). The goodness of fit on  $F^2$  was 1.127. Flack parameter = 0.032(5).

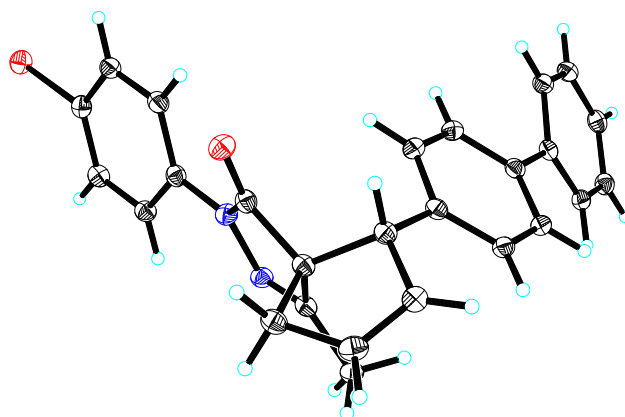

(30% ellipsoid probability)

**Figure S2.** Crystal Structure of (5*R*,6*S*)-4r (CCDC 2012367).

**Table S6.** Crystal data and structure refinement for (5*R*,6*S*)-4r.

|                      |                                                                                                                            |
|----------------------|----------------------------------------------------------------------------------------------------------------------------|
| Identification code  | global                                                                                                                     |
| Empirical formula    | C <sub>26</sub> H <sub>21</sub> BrN <sub>2</sub> O                                                                         |
| Formula weight       | 457.36                                                                                                                     |
| Temperature          | 100(2) K                                                                                                                   |
| Wavelength           | 1.54178 \AA                                                                                                                |
| Crystal system       | Orthorhombic                                                                                                               |
| Space group          | P2 <sub>1</sub> 2 <sub>1</sub> 2 <sub>1</sub>                                                                              |
| Unit cell dimensions | $a = 8.6954(2) \text{ \AA}$ $b = 14.0748(3) \text{ \AA}$ $c = 16.9937(4) \text{ \AA}$ $\alpha = \beta = \gamma = 90^\circ$ |

|                                 |                                      |               |
|---------------------------------|--------------------------------------|---------------|
|                                 | $b = 14.0748(3) \text{ \AA}$         | $= 90^\circ.$ |
|                                 | $c = 16.9937(4) \text{ \AA}$         | $= 90^\circ.$ |
| Volume                          | 2079.79(8) $\text{\AA}^3$            |               |
| Z                               | 4                                    |               |
| Density (calculated)            | 1.461 $\text{Mg/m}^3$                |               |
| Absorption coefficient          | 2.847 $\text{mm}^{-1}$               |               |
| F(000)                          | 936                                  |               |
| Crystal size                    | 0.380 x 0.300 x 0.200 $\text{mm}^3$  |               |
| Theta range for data collection | 4.08 to 80.23°.                      |               |
| Index ranges                    | -11<=h<=10, -17<=k<=14, -21<=l<=21   |               |
| Reflections collected           | 21873                                |               |
| Independent reflections         | 4446 [R(int) = 0.0367]               |               |
| Completeness to theta = 80.23°  | 99.0 %                               |               |
| Absorption correction           | Semi-empirical from equivalents      |               |
| Max. and min. transmission      | 0.60 and 0.20                        |               |
| Refinement method               | Full-matrix least-squares on $F^2$   |               |
| Data / restraints / parameters  | 4446 / 0 / 272                       |               |
| Goodness-of-fit on $F^2$        | 1.127                                |               |
| Final R indices [I>2sigma(I)]   | R1 = 0.0224, wR2 = 0.0563            |               |
| R indices (all data)            | R1 = 0.0225, wR2 = 0.0564            |               |
| Absolute structure parameter    | 0.032(5)                             |               |
| Largest diff. peak and hole     | 0.231 and -0.296 $\text{e.\AA}^{-3}$ |               |

## 5.2 Assignment of Absolute Configuration for Product (5*S*,6*S*)-4r

Crystal data for (5*S*,6*S*)-4r: C<sub>26</sub>H<sub>21</sub>BrN<sub>2</sub>O,  $M = 457.36$ ,  $a = 6.08550(10)$  Å,  $b = 15.9623(4)$  Å,  $c = 21.2691(5)$  Å,  $\alpha = 90^\circ$ ,  $\beta = 90^\circ$ ,  $\gamma = 90^\circ$ ,  $V = 2066.05(8)$  Å<sup>3</sup>,  $T = 100.(2)$  K, space group  $P2_12_12_1$ ,  $Z = 4$ ,  $\mu(\text{Cu K}\alpha) = 2.866$  mm<sup>-1</sup>, 14666 reflections measured, 3980 independent reflections ( $R_{int} = 0.0503$ ). The final  $R_I$  values were 0.0277 ( $I > 2\sigma(I)$ ). The final  $wR(F^2)$  values were 0.0729 ( $I > 2\sigma(I)$ ). The final  $R_I$  values were 0.0281 (all data). The final  $wR(F^2)$  values were 0.0734 (all data). The goodness of fit on  $F^2$  was 1.029. Flack parameter = 0.039(7).

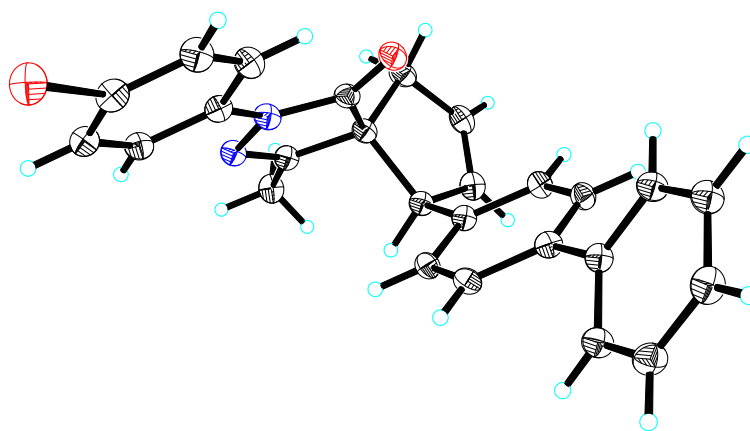

(30% ellipsoid probability)

**Figure S3.** Crystal Structure of (5*S*,6*S*)-4r (CCDC 2012368).

**Table S7.** Crystal data and structure refinement for (5*S*,6*S*)-4r.

|                      |                                                                                      |
|----------------------|--------------------------------------------------------------------------------------|
| Identification code  | global                                                                               |
| Empirical formula    | C <sub>26</sub> H <sub>21</sub> Br N <sub>2</sub> O                                  |
| Formula weight       | 457.36                                                                               |
| Temperature          | 100(2) K                                                                             |
| Wavelength           | 1.54178 Å                                                                            |
| Crystal system       | Orthorhombic                                                                         |
| Space group          | $P2_12_12_1$                                                                         |
| Unit cell dimensions | $a = 6.08550(10)$ Å = 90°.<br>$b = 15.9623(4)$ Å = 90°.<br>$c = 21.2691(5)$ Å = 90°. |
| Volume               | 2066.05(8) Å <sup>3</sup>                                                            |

|                                   |                                             |
|-----------------------------------|---------------------------------------------|
| Z                                 | 4                                           |
| Density (calculated)              | 1.470 Mg/m <sup>3</sup>                     |
| Absorption coefficient            | 2.866 mm <sup>-1</sup>                      |
| F(000)                            | 936                                         |
| Crystal size                      | 0.550 x 0.450 x 0.070 mm <sup>3</sup>       |
| Theta range for data collection   | 3.46 to 72.38°.                             |
| Index ranges                      | -7<=h<=5, -19<=k<=19, -26<=l<=26            |
| Reflections collected             | 14666                                       |
| Independent reflections           | 3980 [R(int) = 0.0503]                      |
| Completeness to theta = 72.38°    | 99.7 %                                      |
| Absorption correction             | Semi-empirical from equivalents             |
| Max. and min. transmission        | 0.82 and 0.20                               |
| Refinement method                 | Full-matrix least-squares on F <sup>2</sup> |
| Data / restraints / parameters    | 3980 / 0 / 272                              |
| Goodness-of-fit on F <sup>2</sup> | 1.029                                       |
| Final R indices [I>2sigma(I)]     | R1 = 0.0277, wR2 = 0.0729                   |
| R indices (all data)              | R1 = 0.0281, wR2 = 0.0734                   |
| Absolute structure parameter      | 0.039(7)                                    |
| Largest diff. peak and hole       | 0.435 and -0.491 e.Å <sup>-3</sup>          |

## 7. Reference

- (1) Kinoshita, H.; Ishikawa, T.; Miura, K. Dialkylaluminum Hydride-Promoted Cyclodimerization of Silylated 1,3-Enynes via Skeletal Rearrangement. *Org. Lett.* **2011**, *13*, 6192–6195.
- (2) Zhang, Y.-C.; Yu, B.-K.; Gao, B.-J.; Zhang, T.-Z.; Huang, H.-M. Triple-Bond Insertion Triggers Highly Regioselective 1,4-Aminomethylation of 1,3-Enynes with Aminals Enabled by Pd-Catalyzed C–N Bond Activation. *Org. Lett.* **2019**, *21*, 535–539.
- (3) Lehmann, F.; Holm, M.; Laufer, S. Three-Component Combinatorial Synthesis of Novel Dihydropyrano[2,3-*c*]pyrazoles. *J. Comb. Chem.* **2008**, *10*, 364–367.
- (4) Mukherjee, P.; Das, A. R. One-Flask Synthesis of Pyrazolone Thioethers Involving Catalyzed and Uncatalyzed Thioetherification Pathways of Pyrazolones. *Org. Biomol. Chem.* **2017**, *15*, 7267–7271.

# 8. Copies of NMR

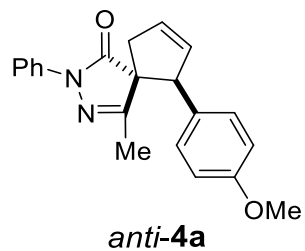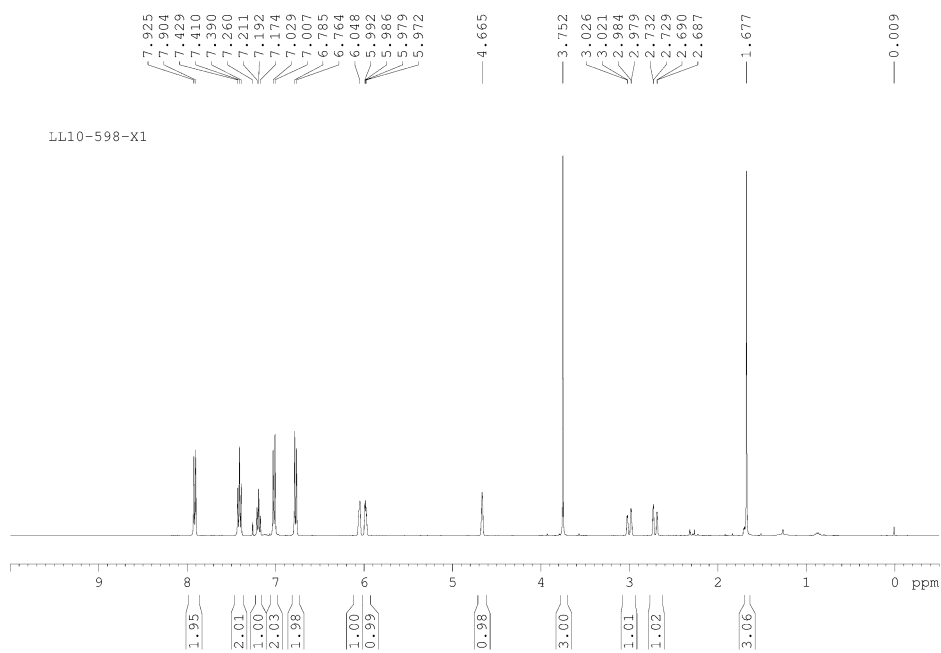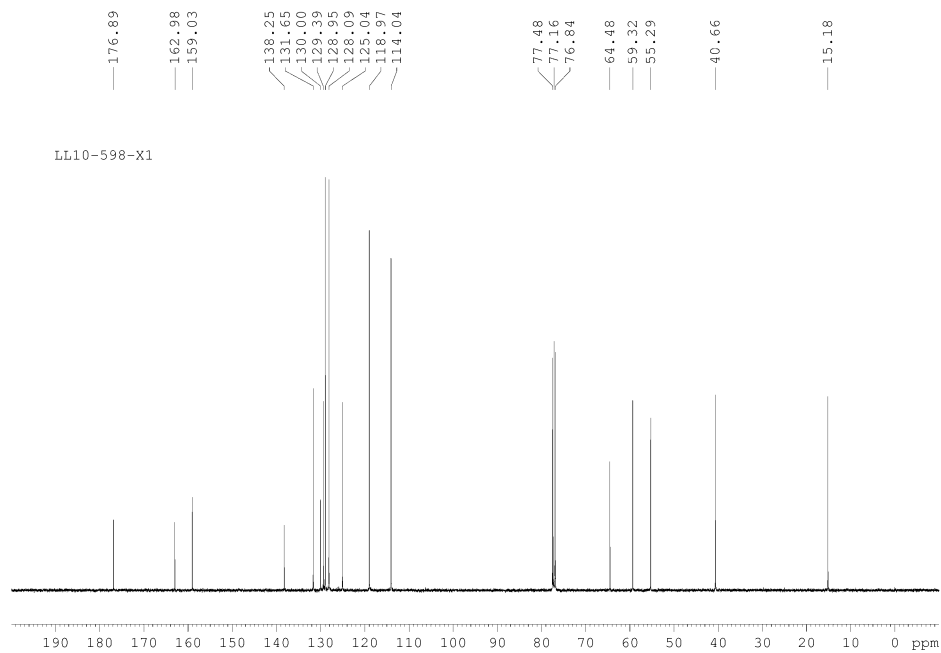



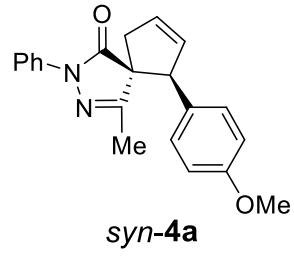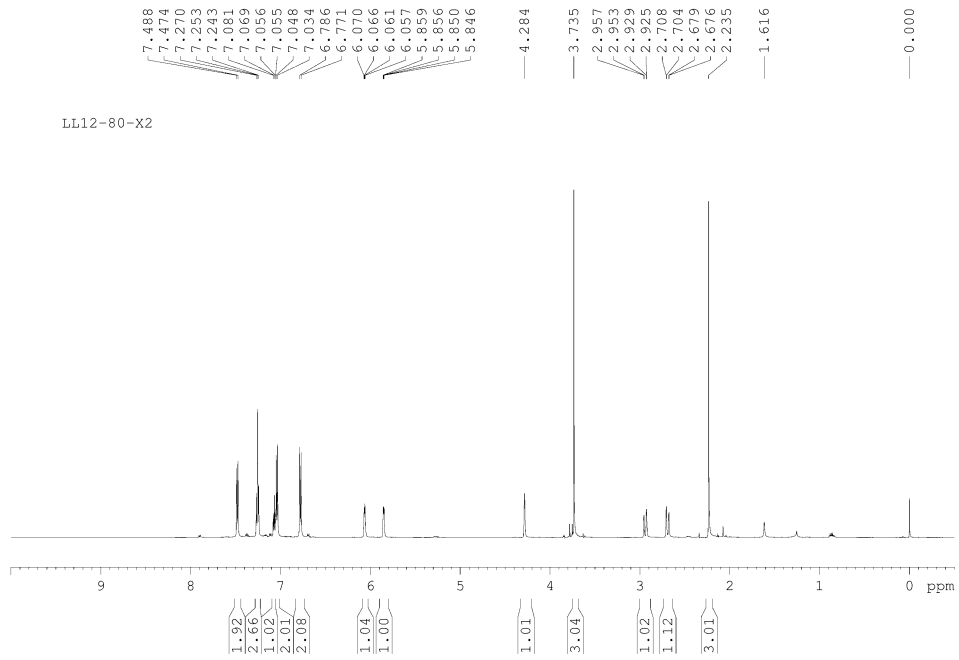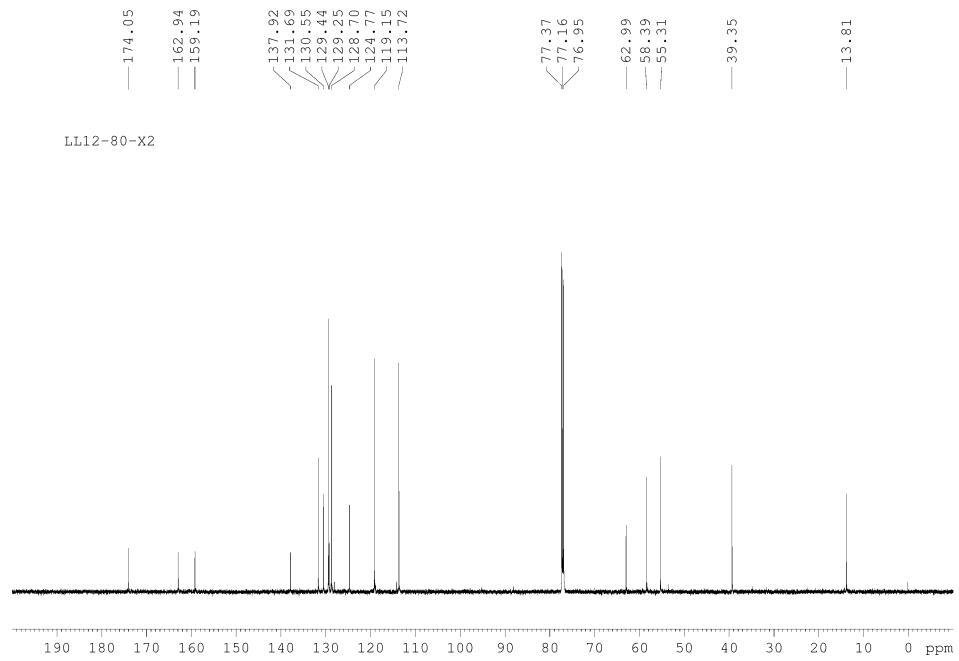

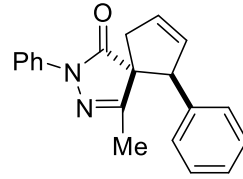

*anti-4b*

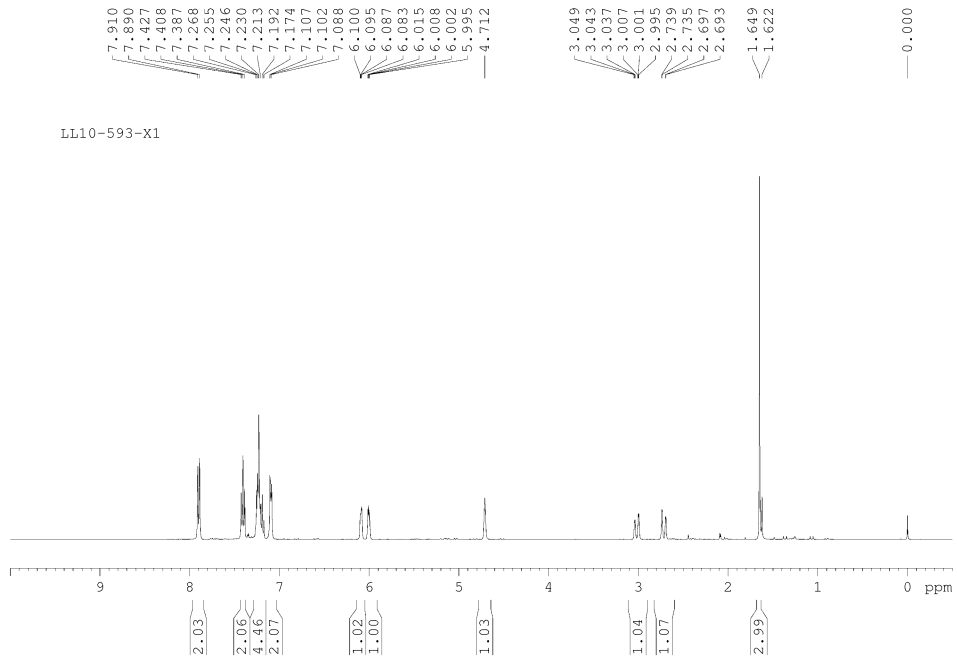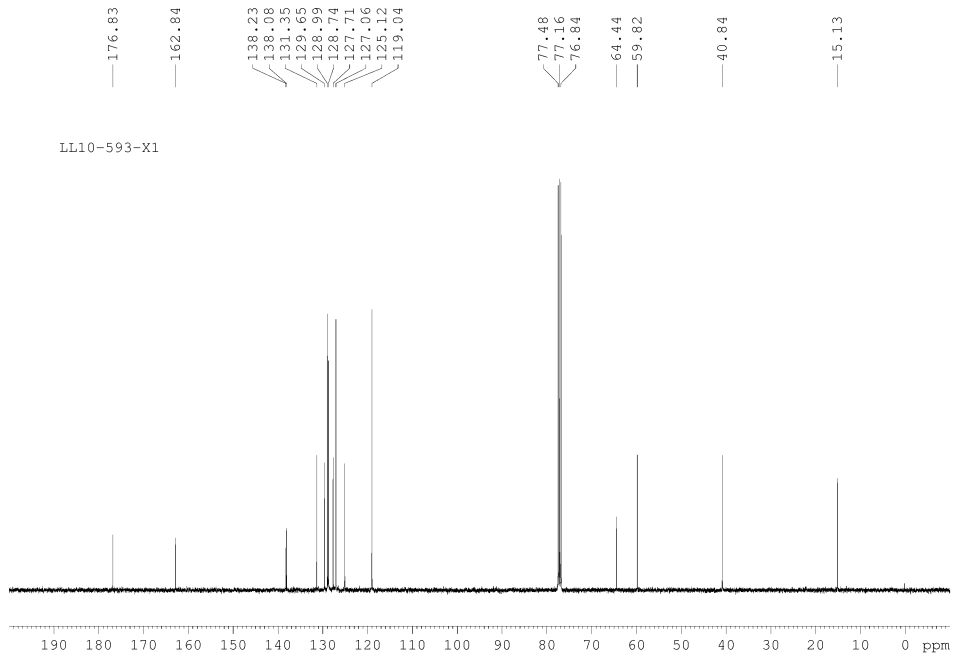

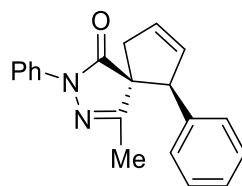

***syn-4b***

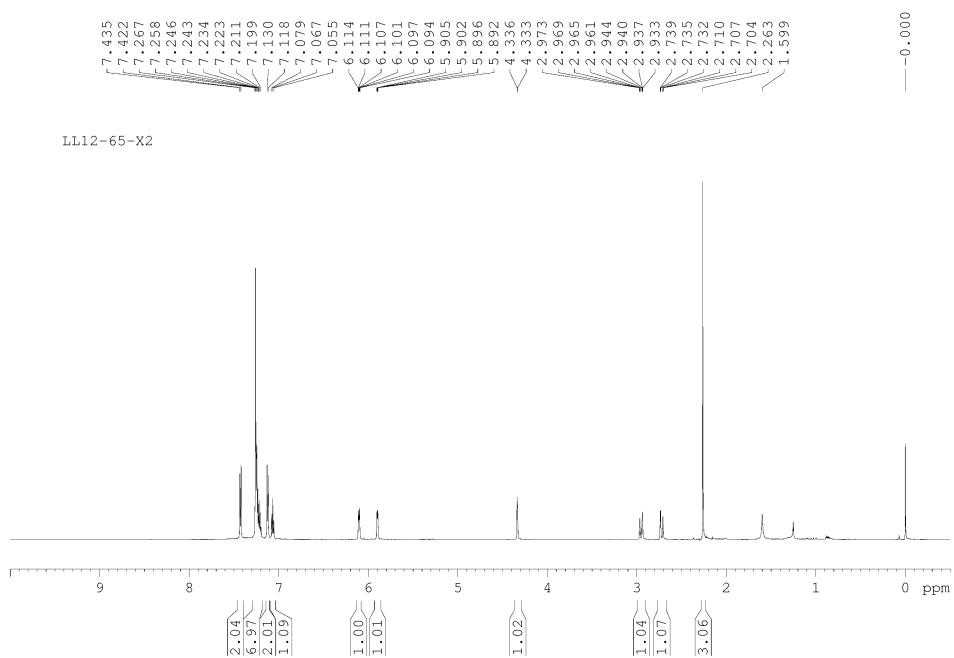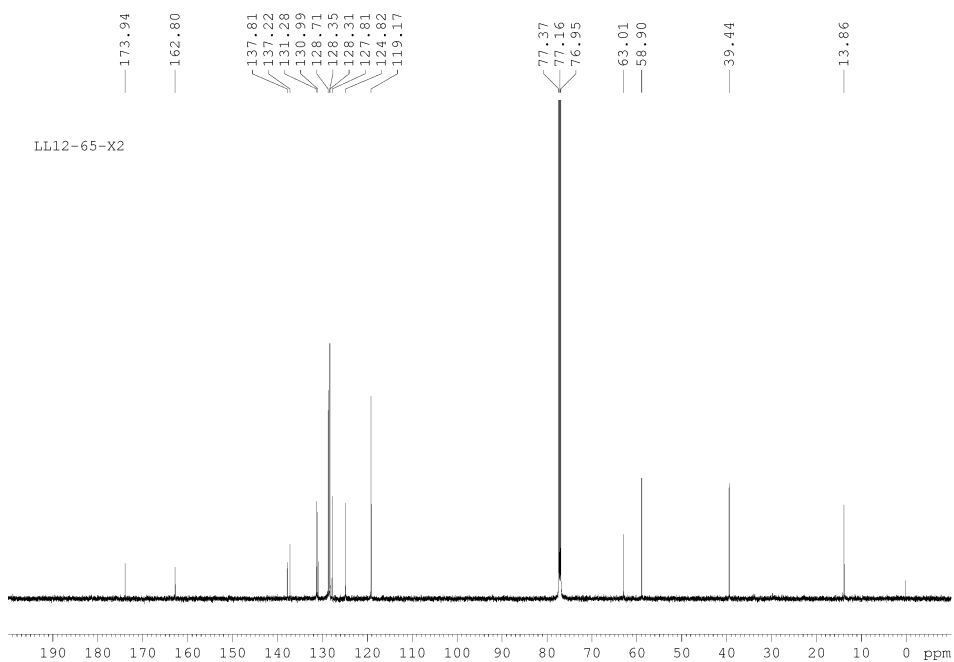

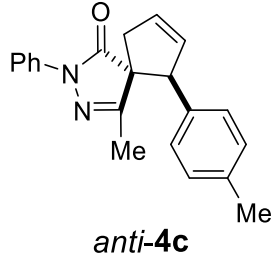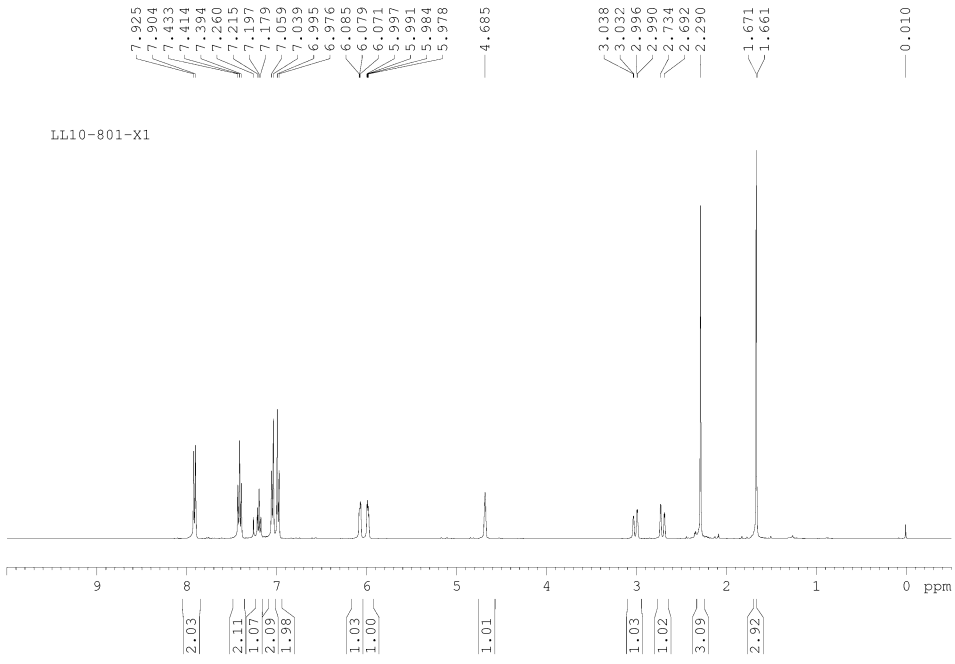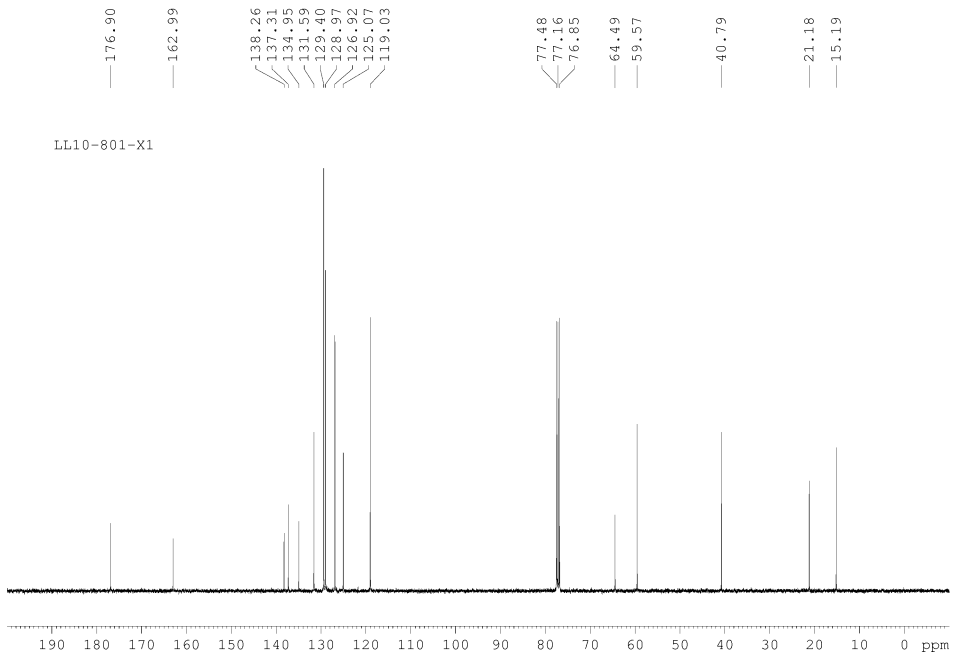

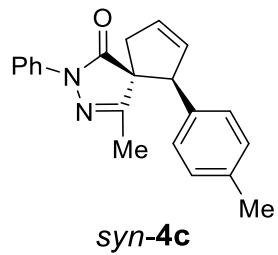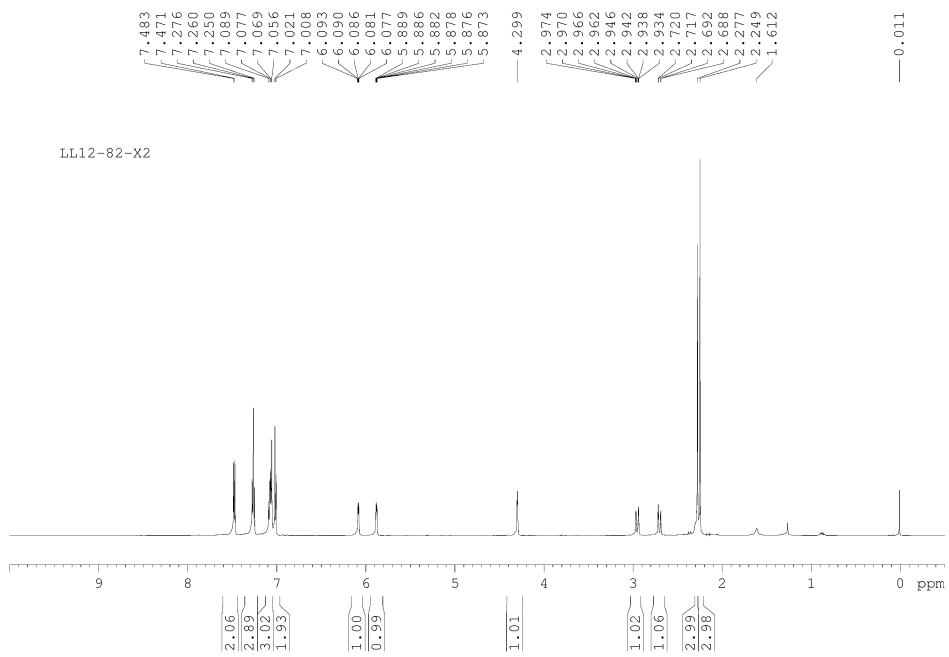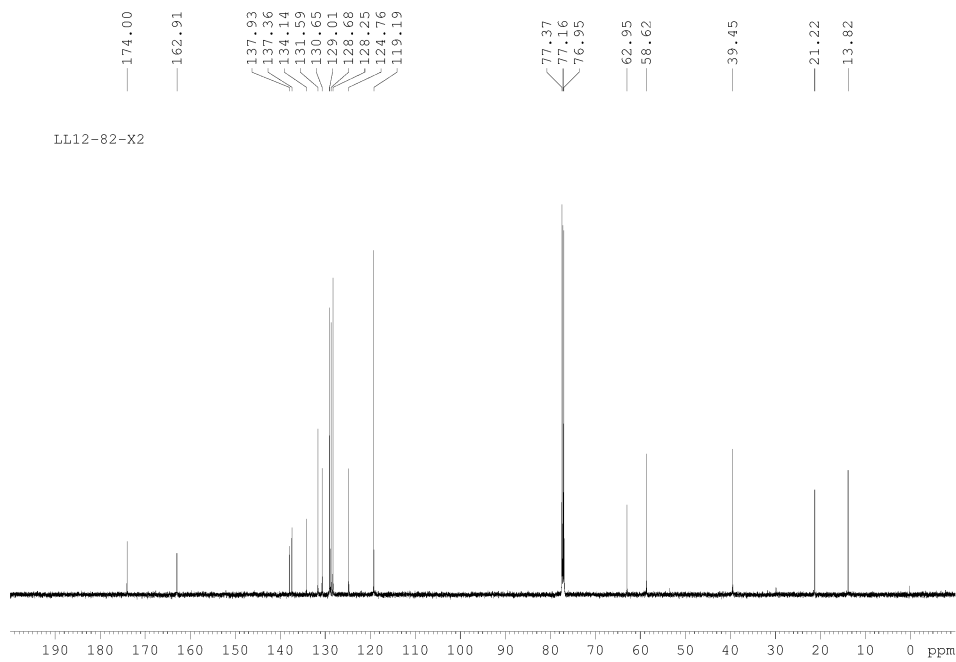

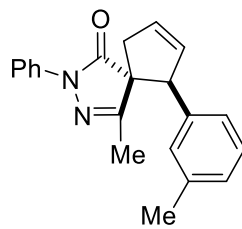

*anti*-4d

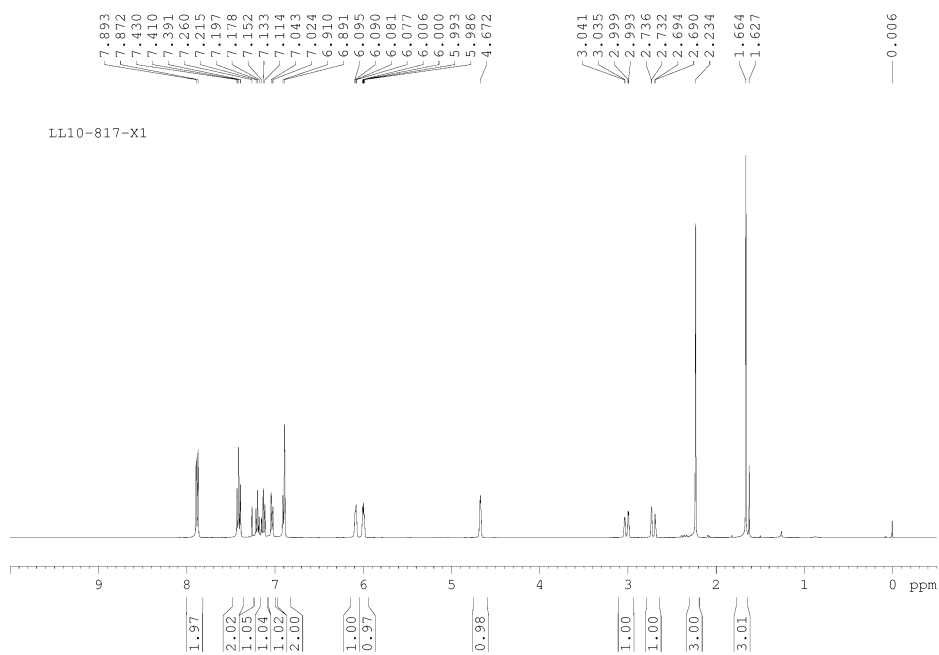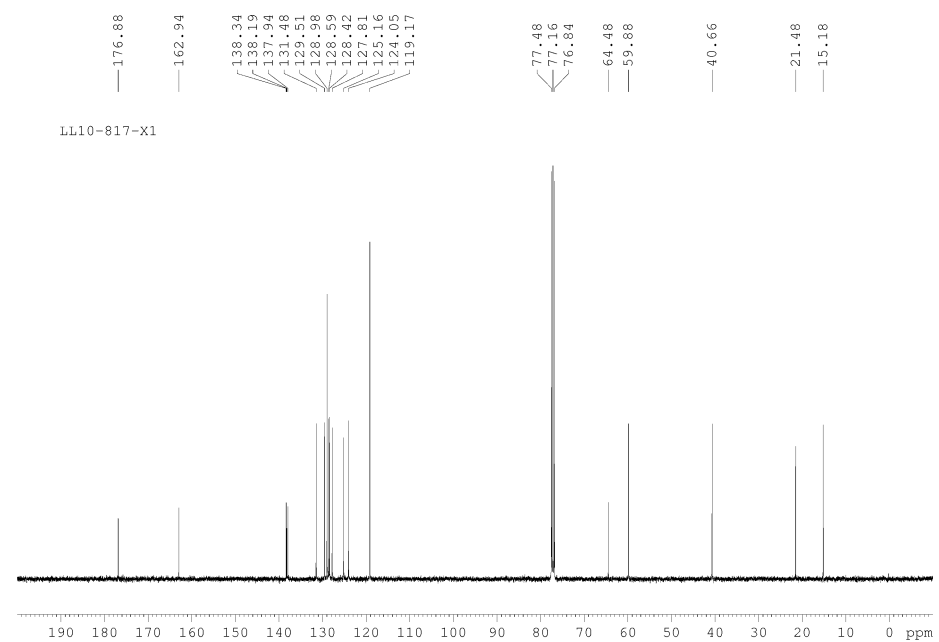

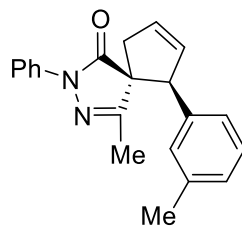

*syn-4d*

7.446  
7.262  
7.259  
7.250  
7.248  
7.246  
7.236  
7.145  
7.132  
7.124  
7.119  
7.1076  
7.064  
7.051  
7.016  
7.003  
6.914  
6.912  
6.090  
6.086  
6.082  
6.076  
6.072  
6.066  
6.063  
3.883  
3.882  
3.886  
3.884  
3.882  
3.880  
3.877  
3.873  
4.280  
4.287  
4.284  
2.960  
2.956  
2.952  
2.948  
2.931  
2.928  
2.924  
2.920  
2.714  
2.710  
2.707  
2.703  
2.685  
2.682  
2.678  
2.675  
2.251  
2.243

LL12-85-X2

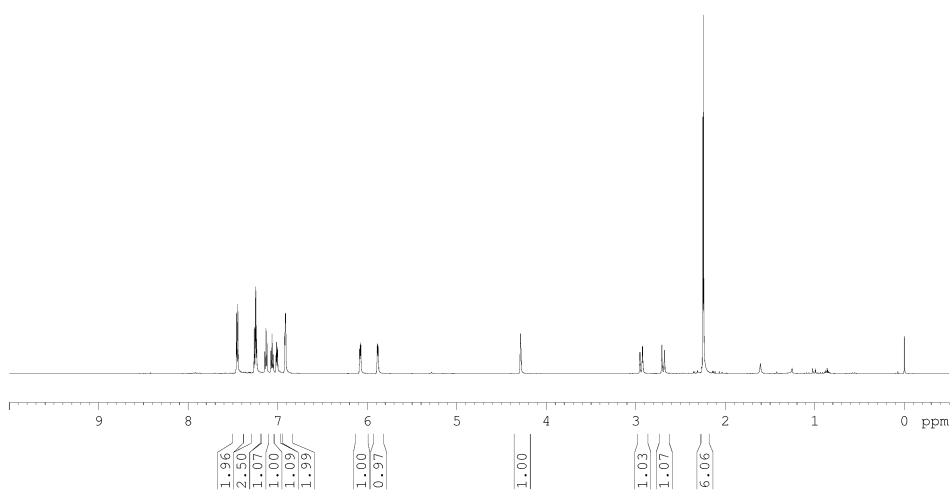

173.976  
162.886  
137.896  
137.842  
137.211  
131.357  
130.793  
128.989  
128.681  
128.526  
128.160  
125.413  
124.761  
119.165

LL12-85-X2

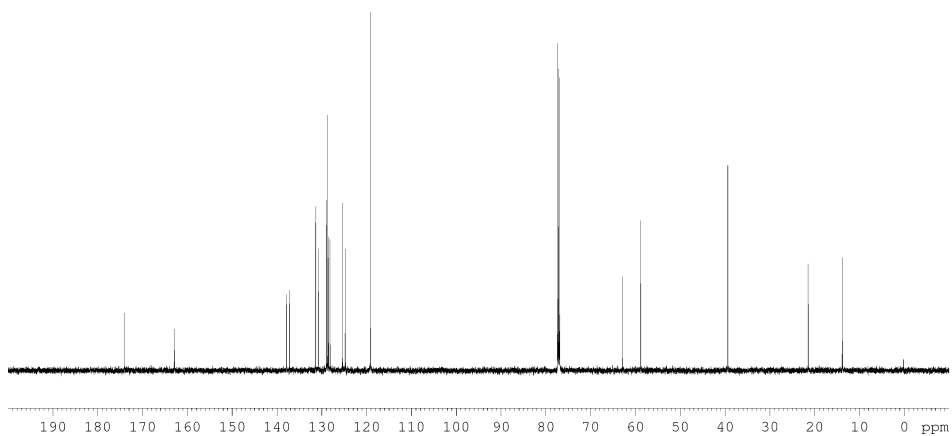

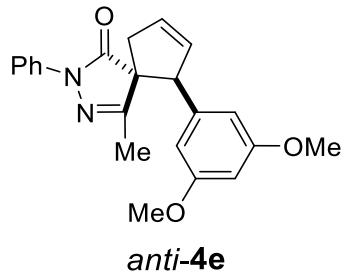

7.920  
7.899  
7.413  
7.394  
7.374  
7.260  
7.194  
7.176  
7.157  
6.303  
6.226  
6.059  
6.051  
5.995  
5.990  
5.983  
— 4.638  
— 3.593  
3.034  
3.029  
2.992  
2.987  
2.719  
2.678  
— 1.737  
— 1.616  
— 0.000

LL10-810-X1

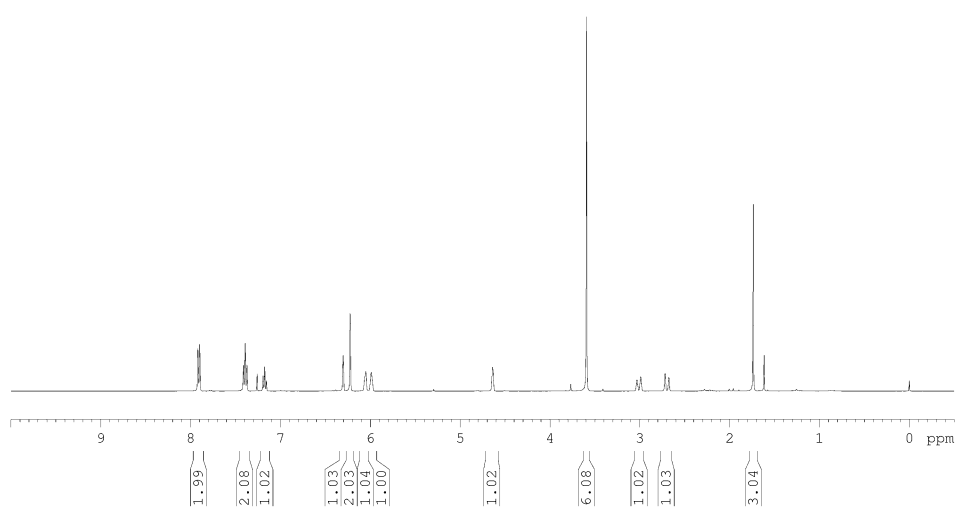

176.79  
162.96  
160.97  
140.35  
138.22  
131.16  
129.70  
129.00  
125.11  
118.85  
104.88  
99.76  
77.48  
77.16  
76.84  
64.52  
60.03  
55.30  
40.58  
15.27

LL10-810-X1

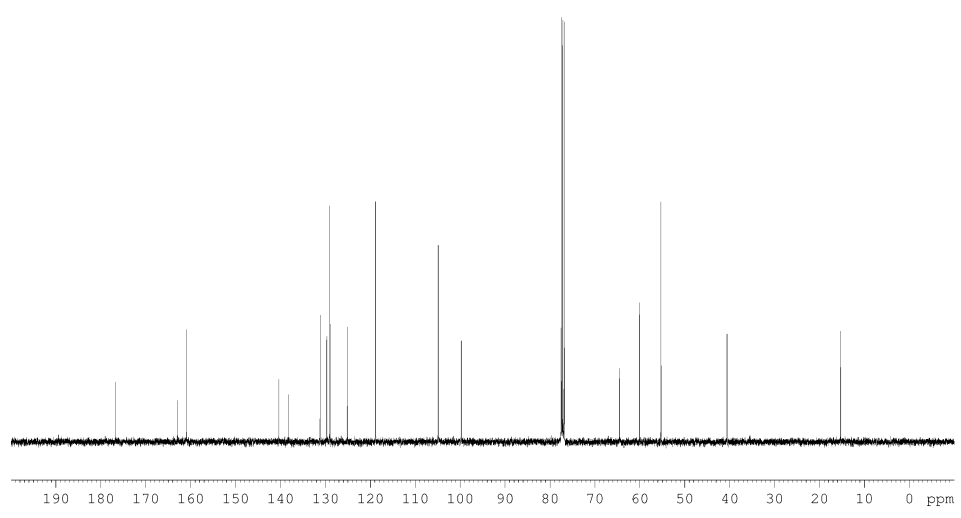



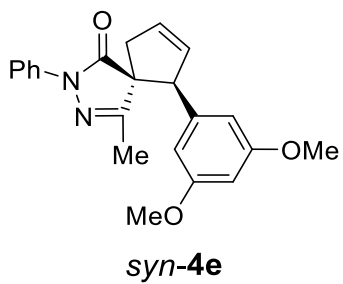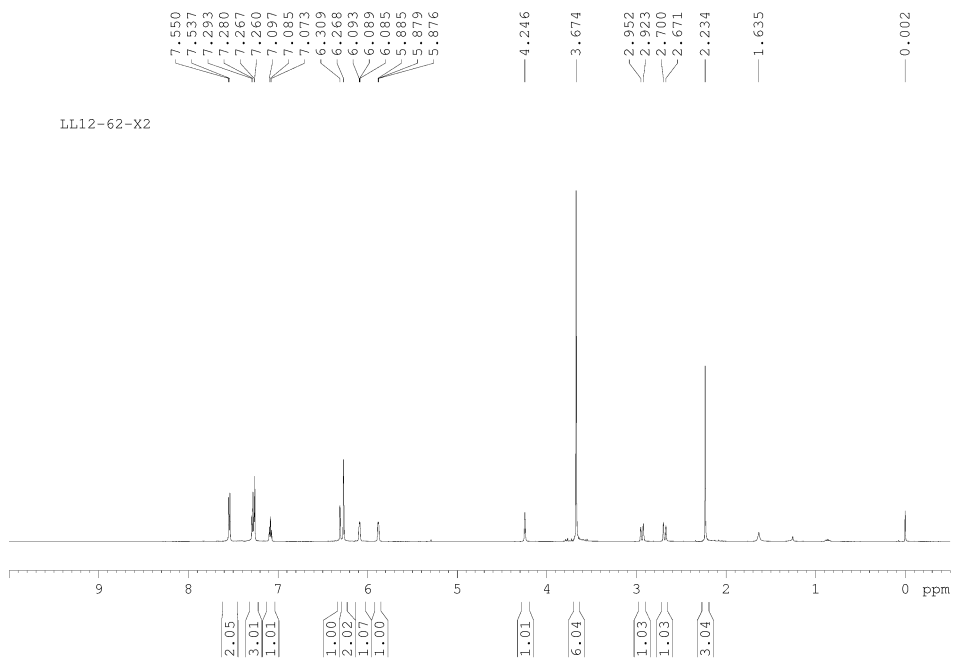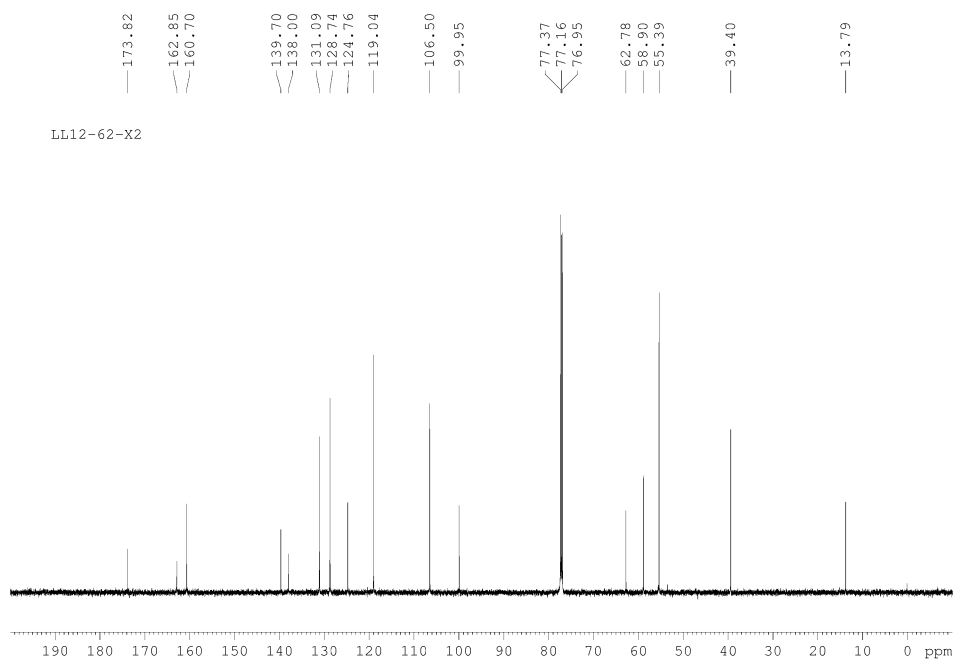

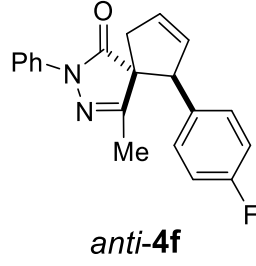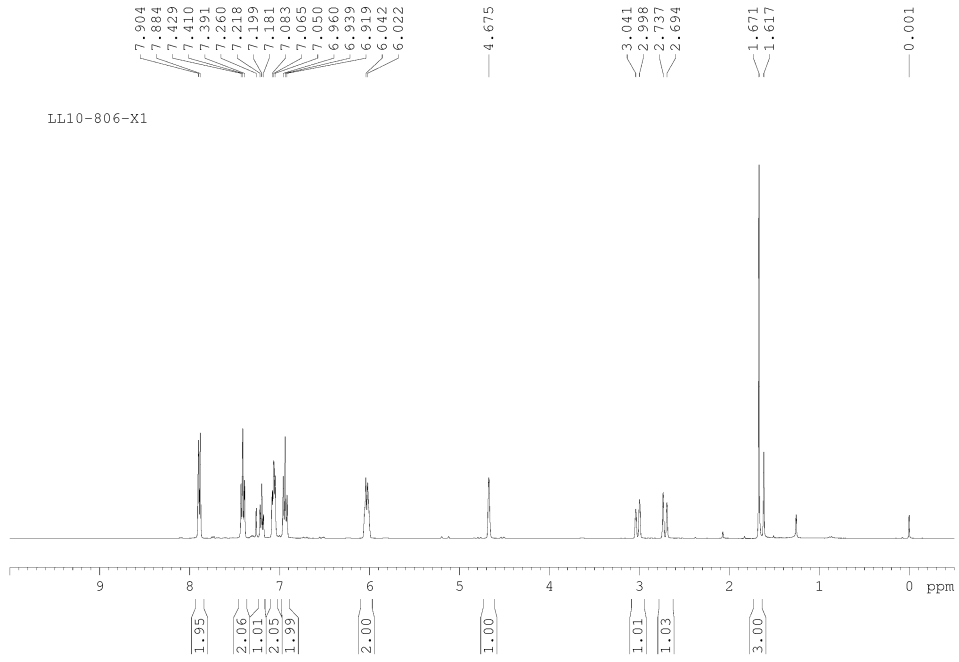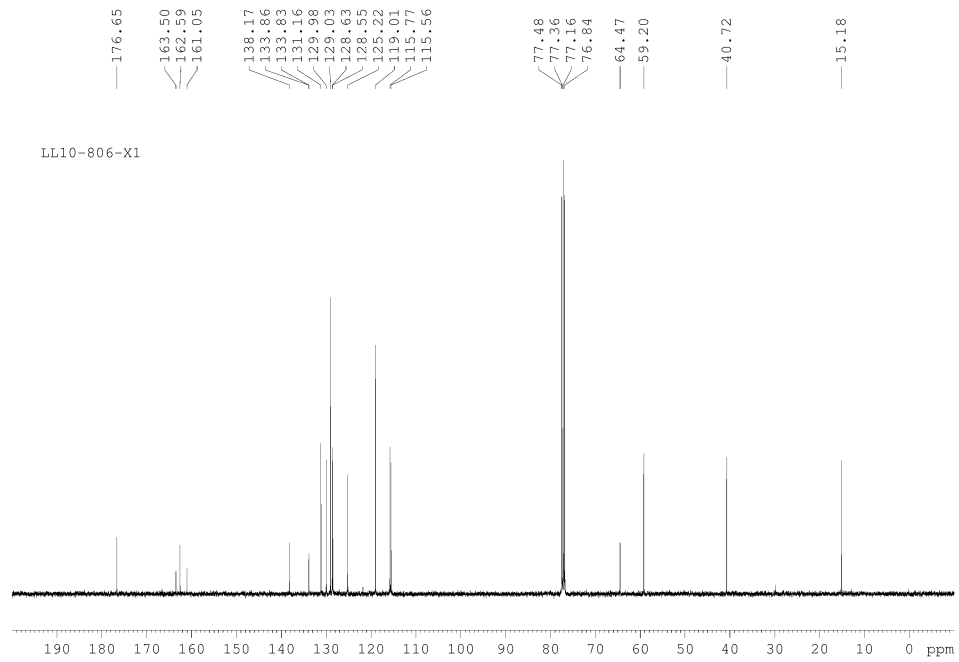

LL10-806-X1

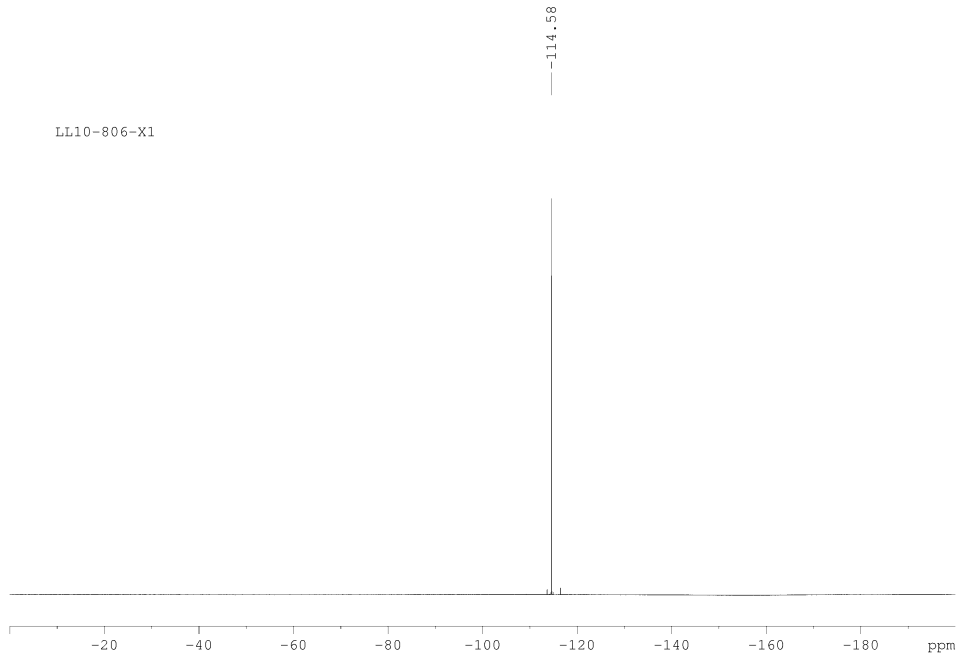

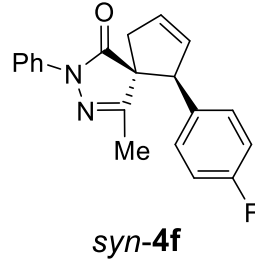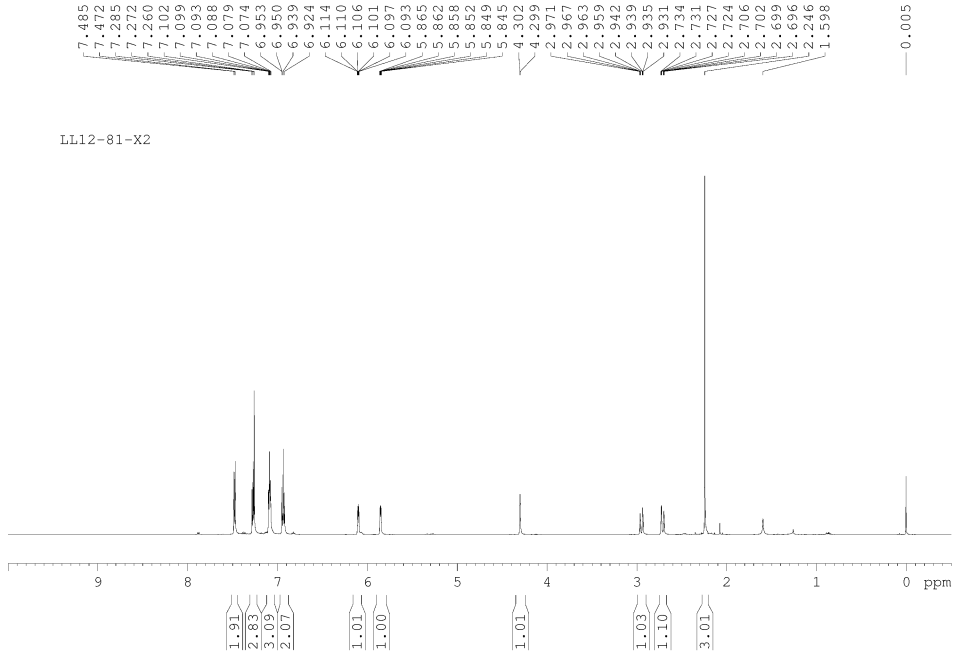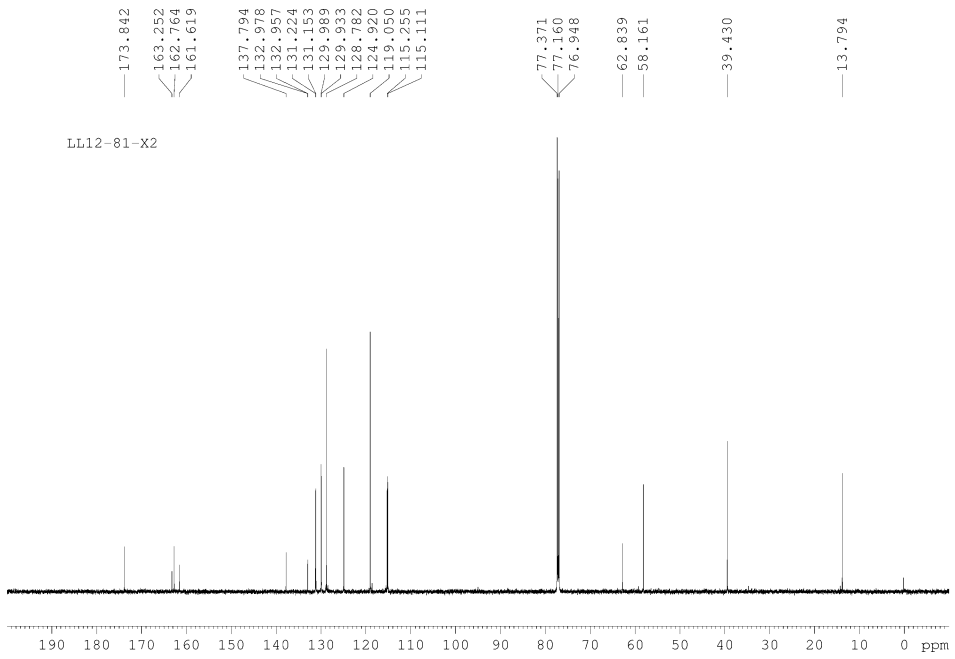

LL12-81-X2

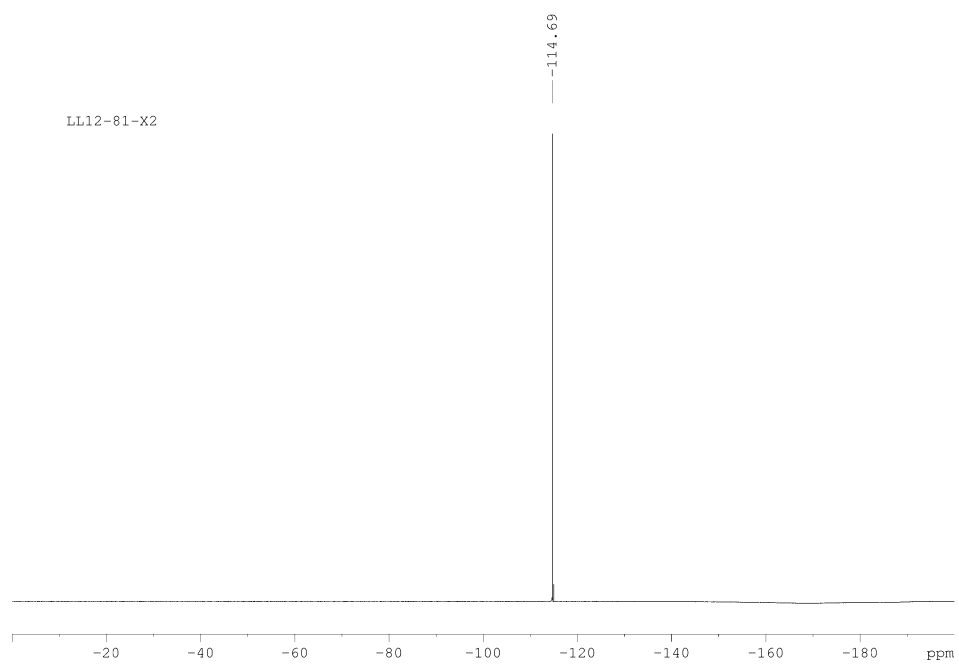

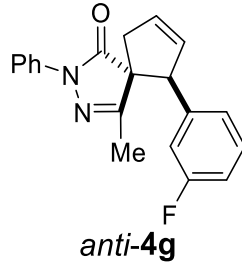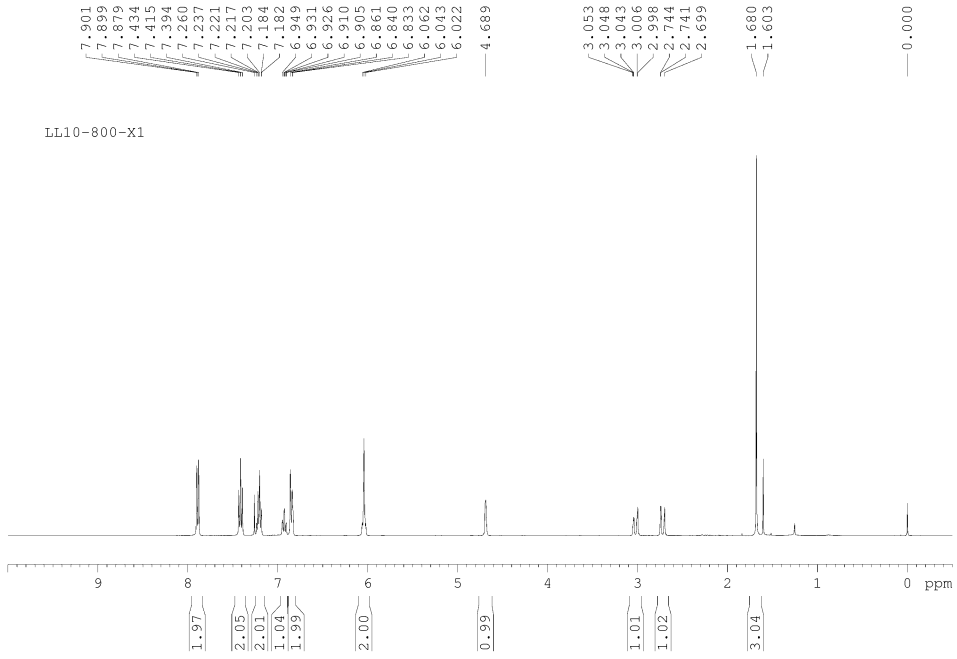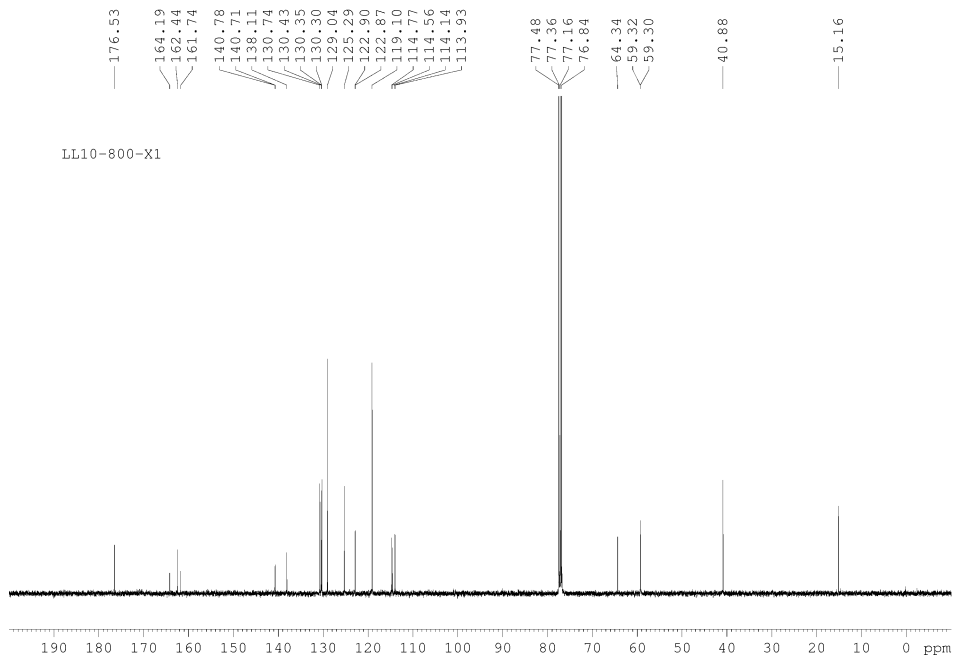

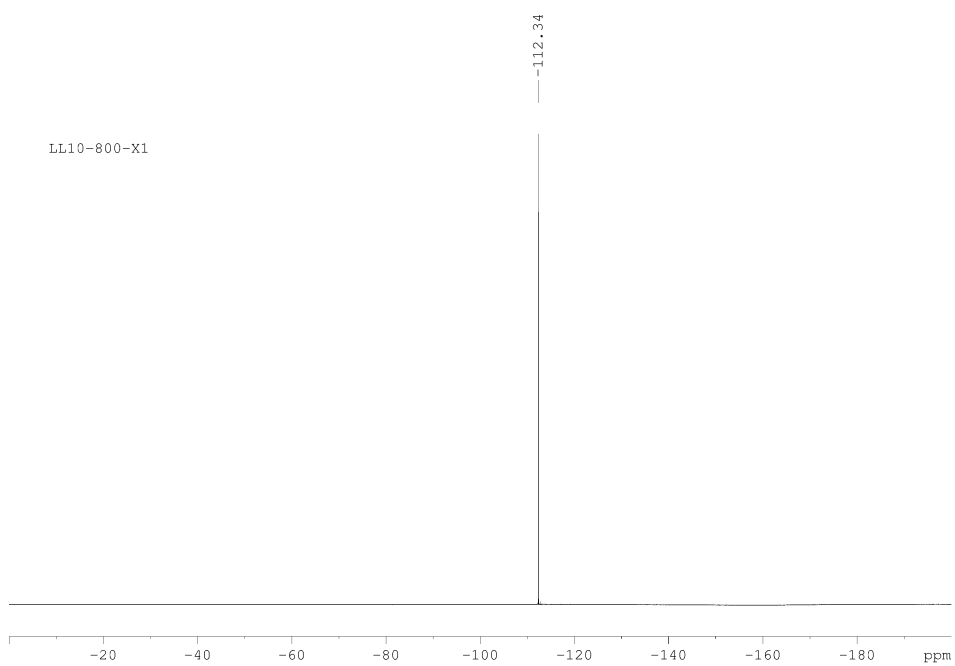

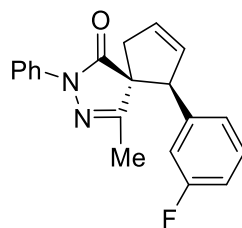

***syn*-4g**

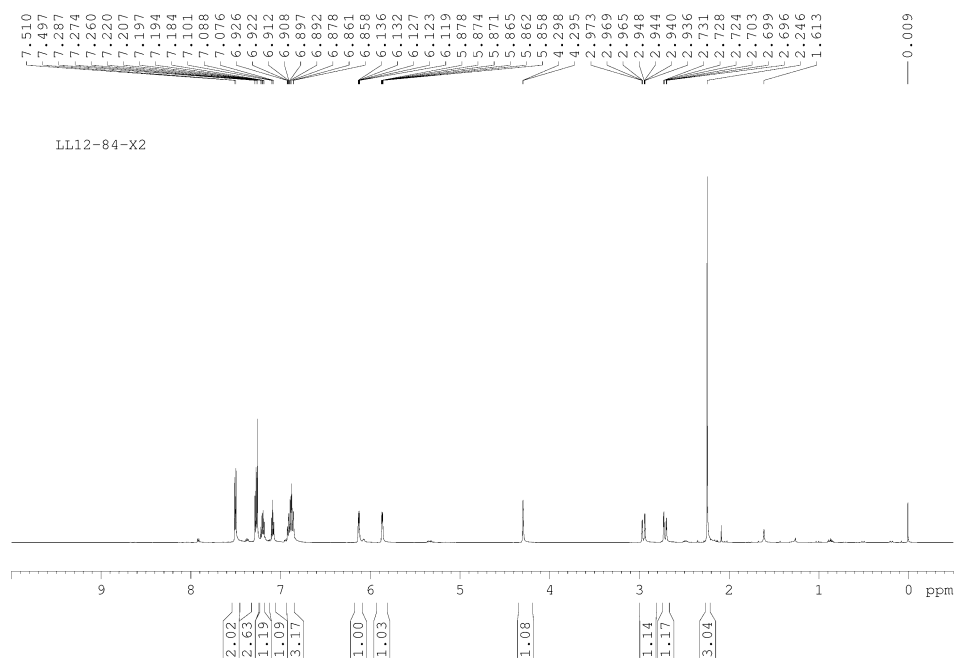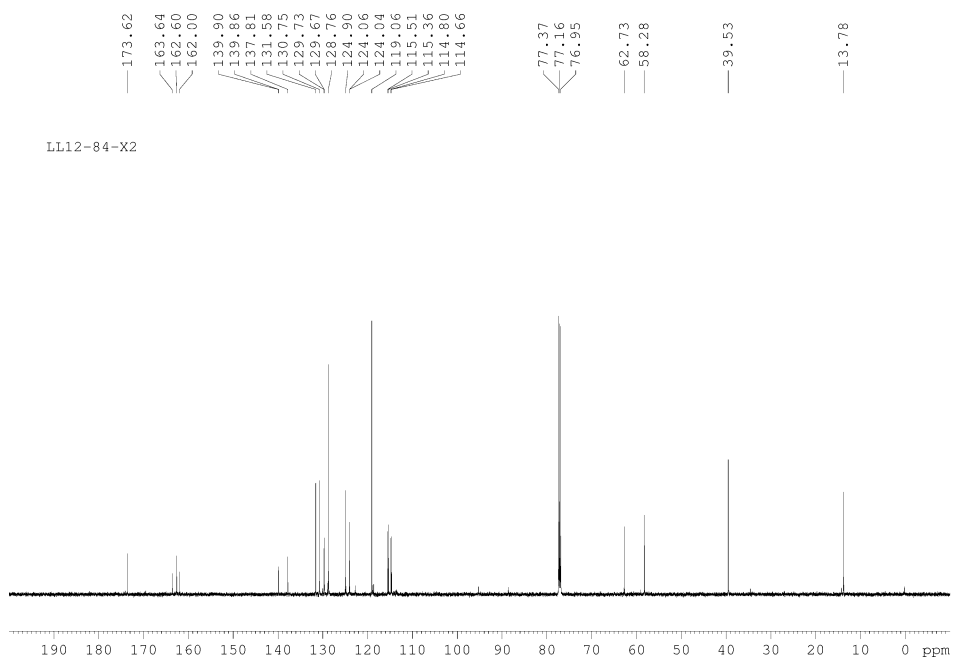



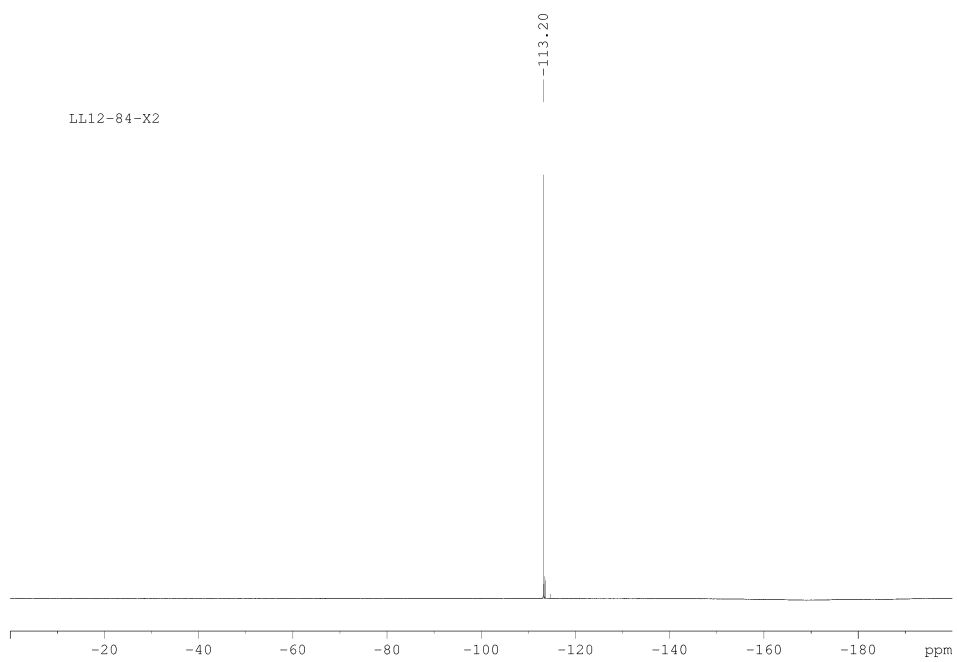

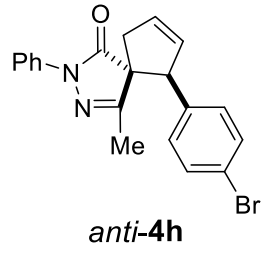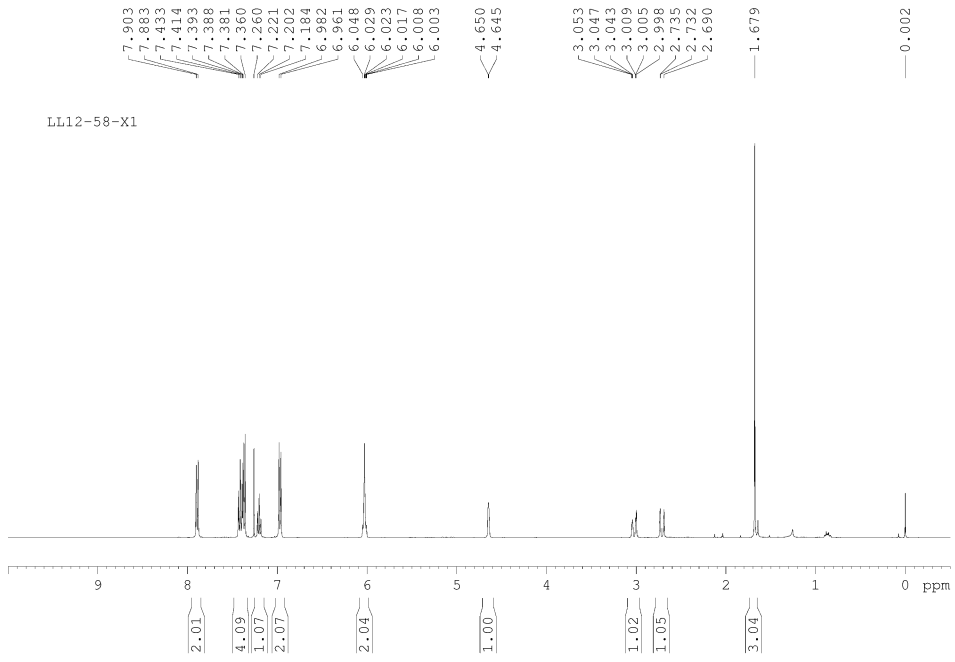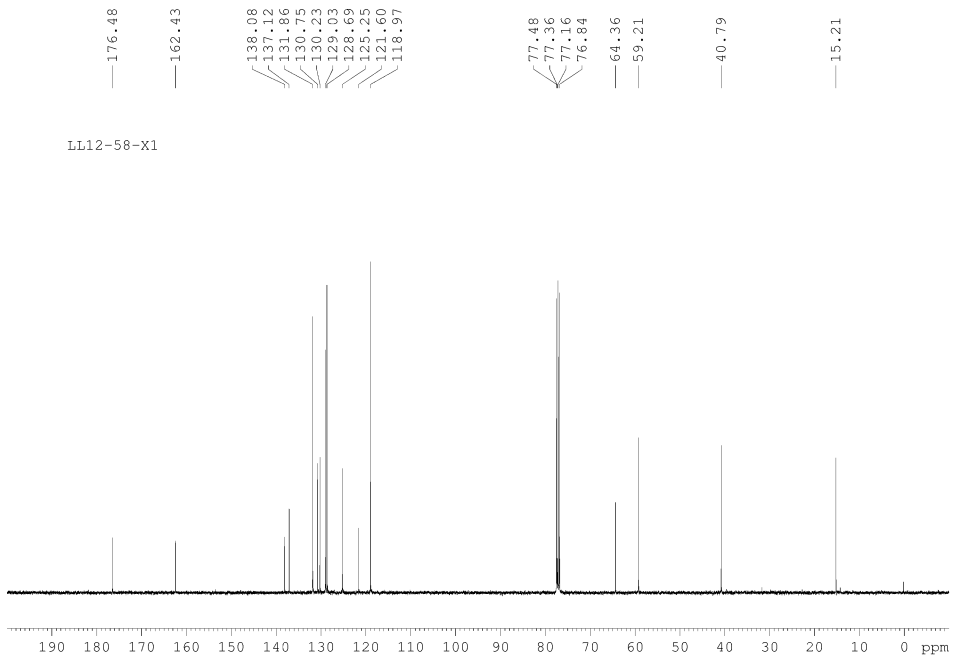

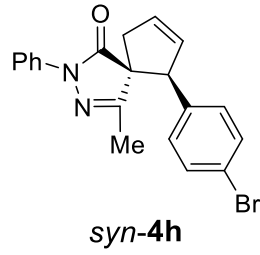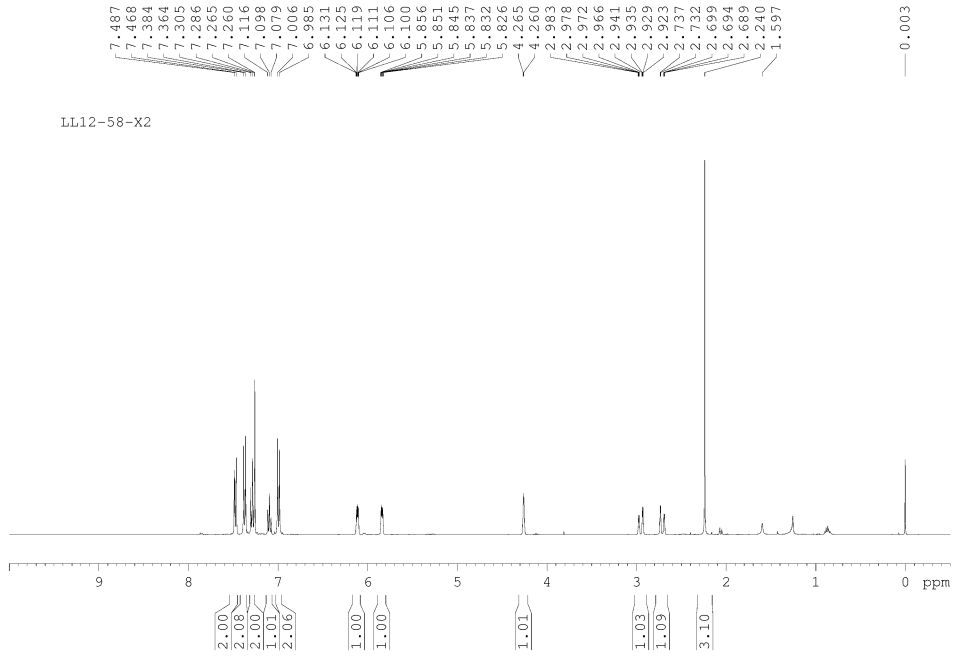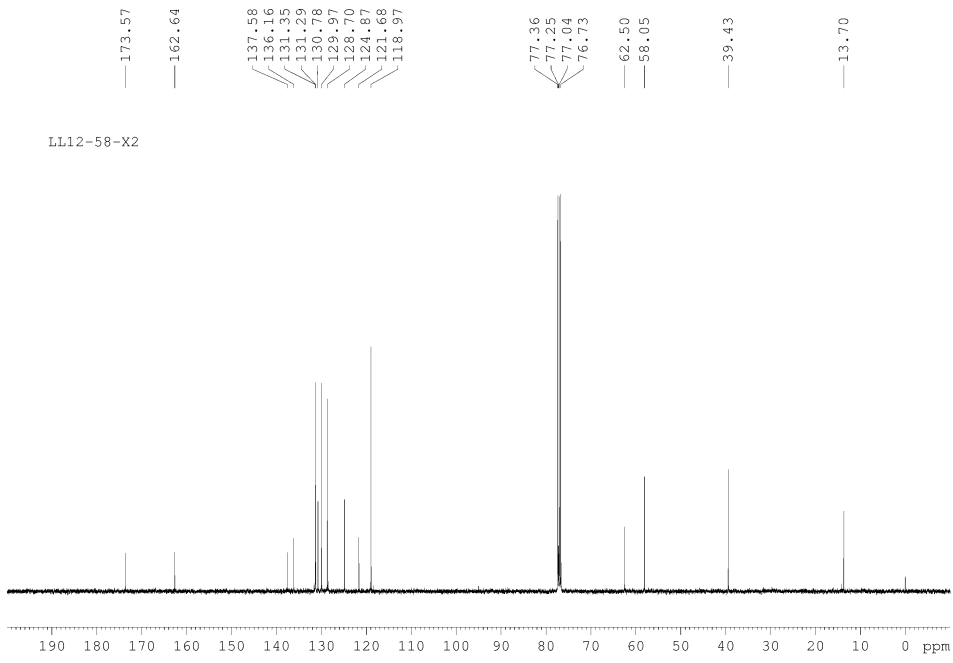

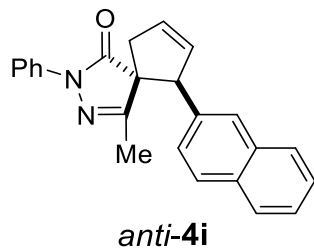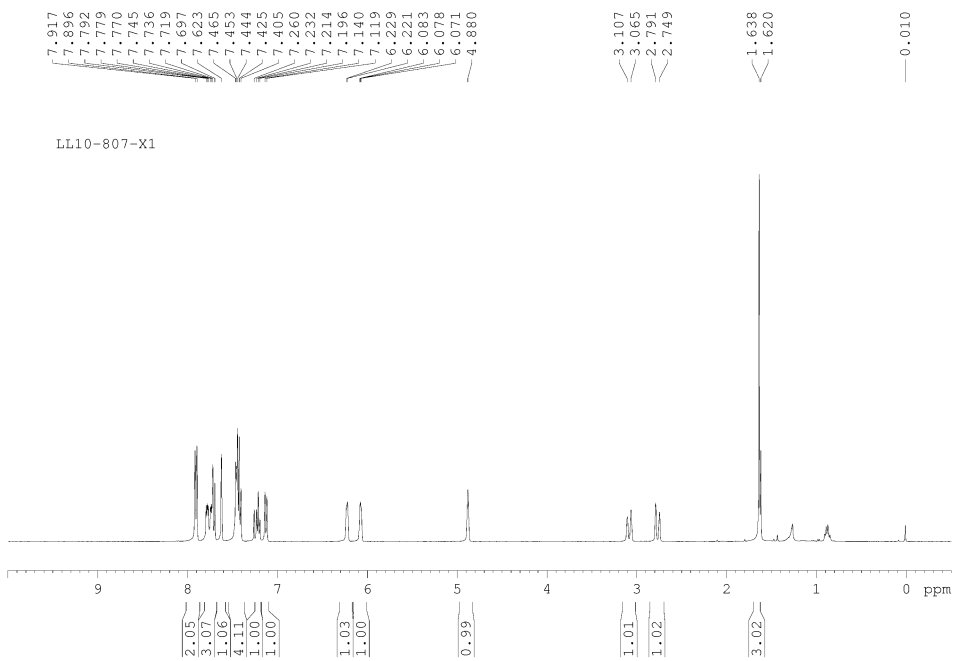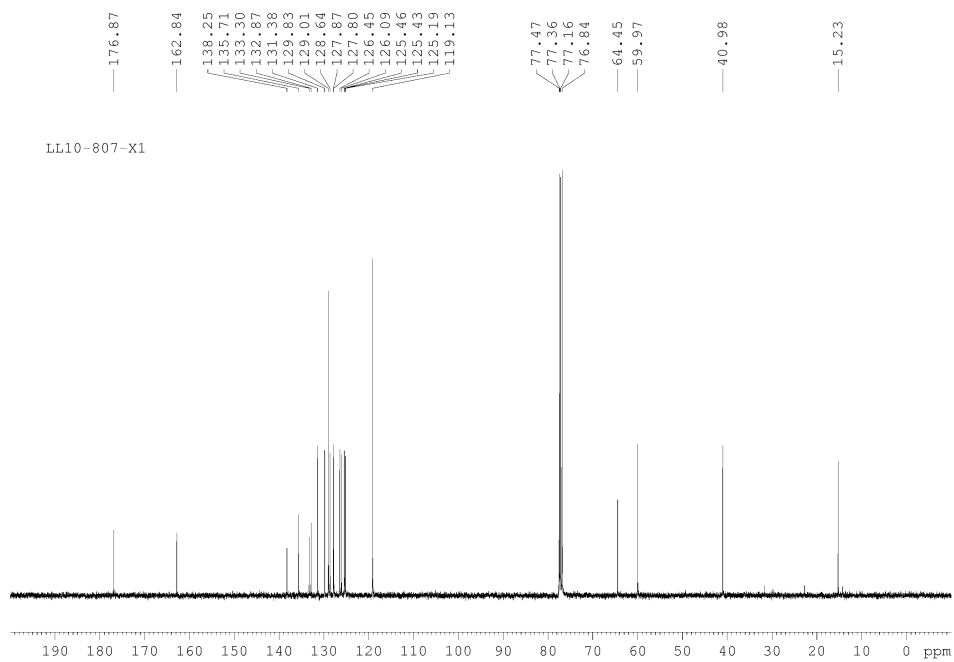

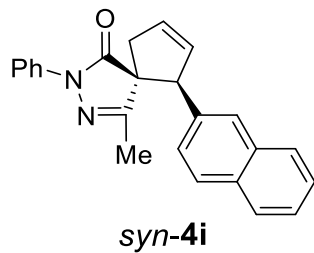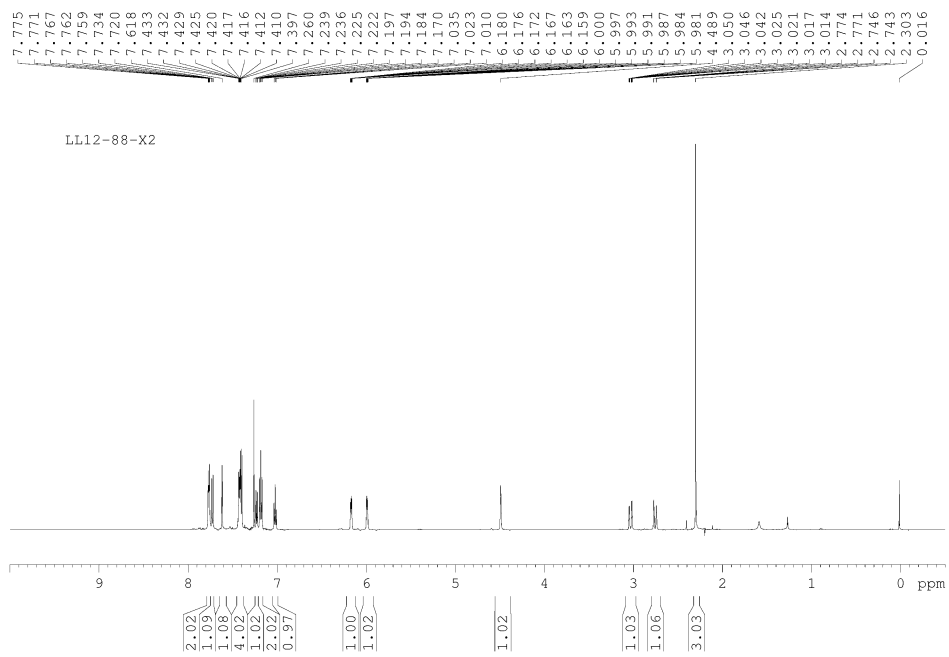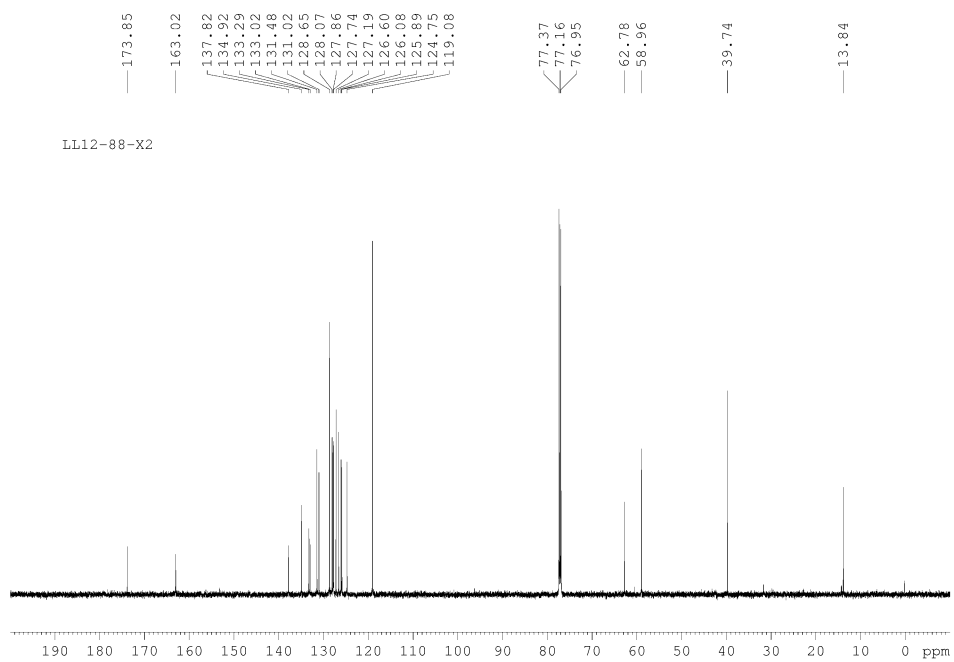

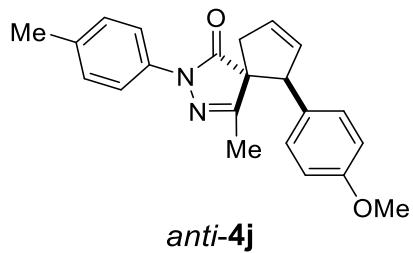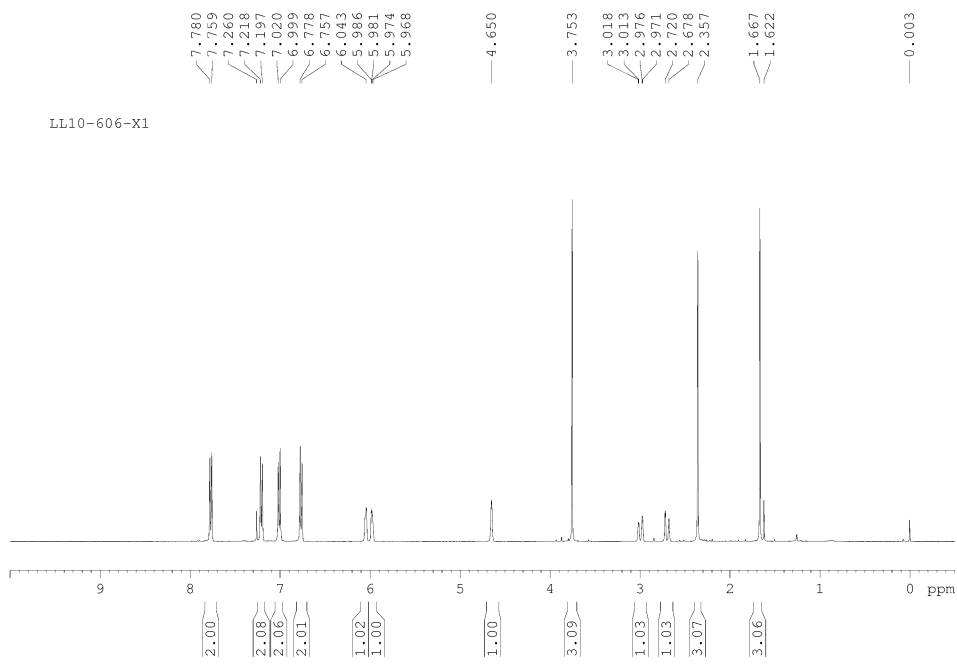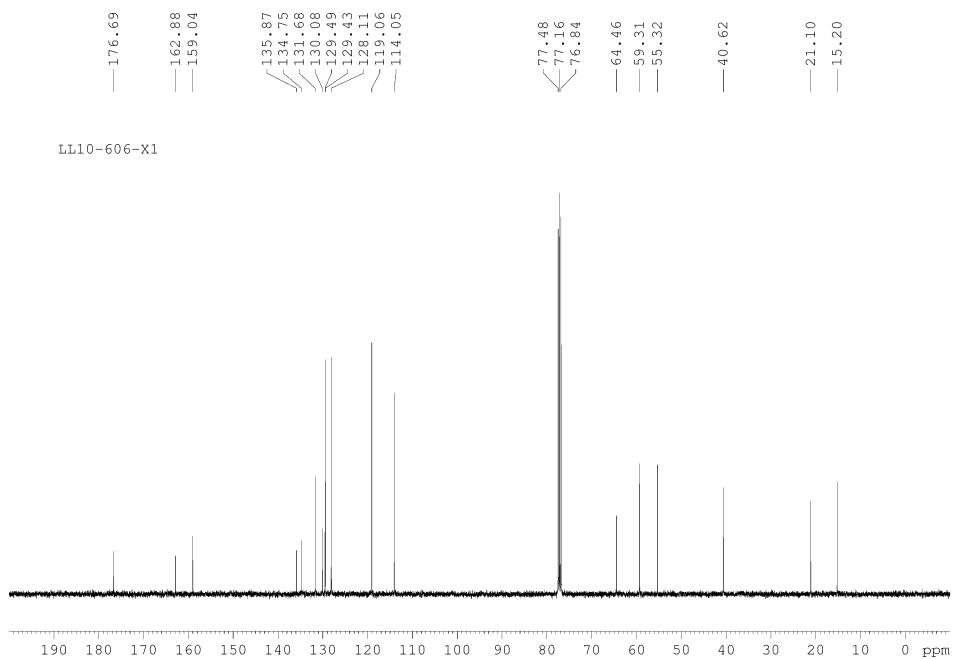

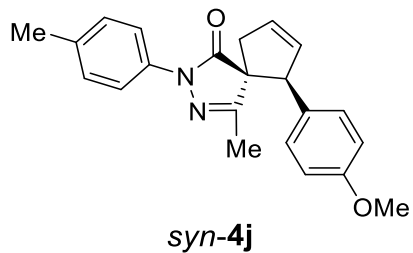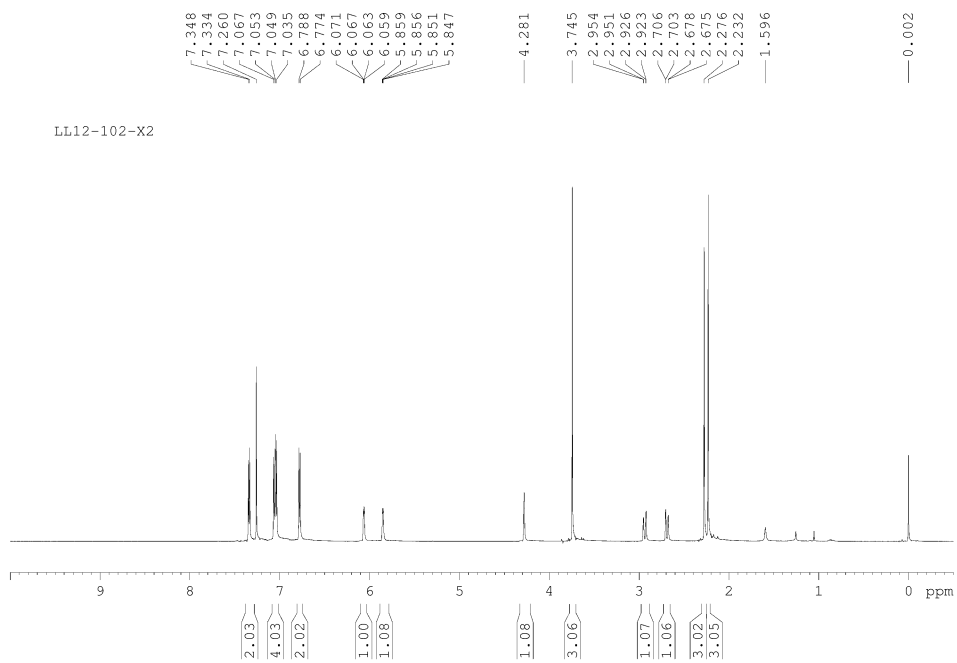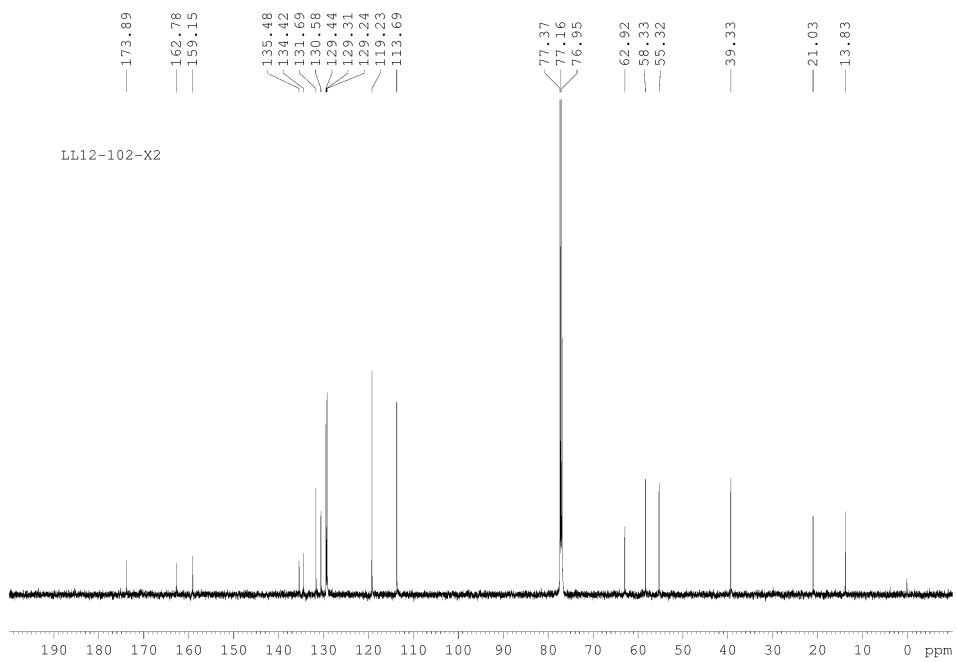

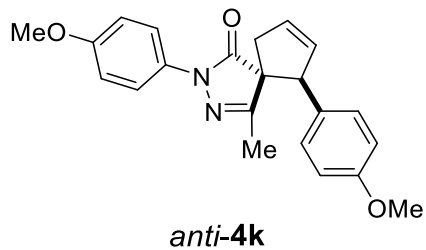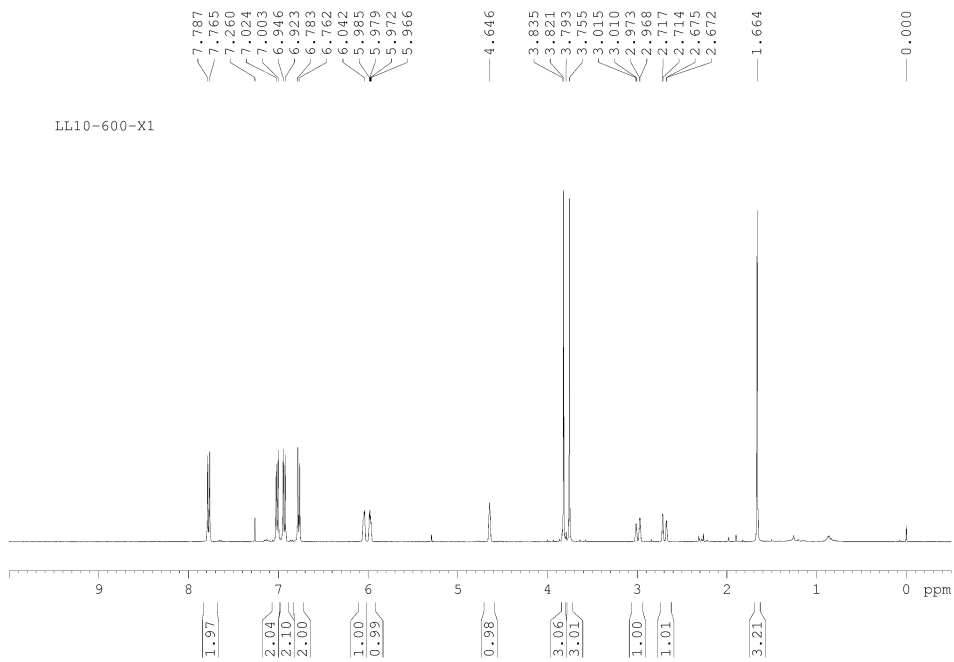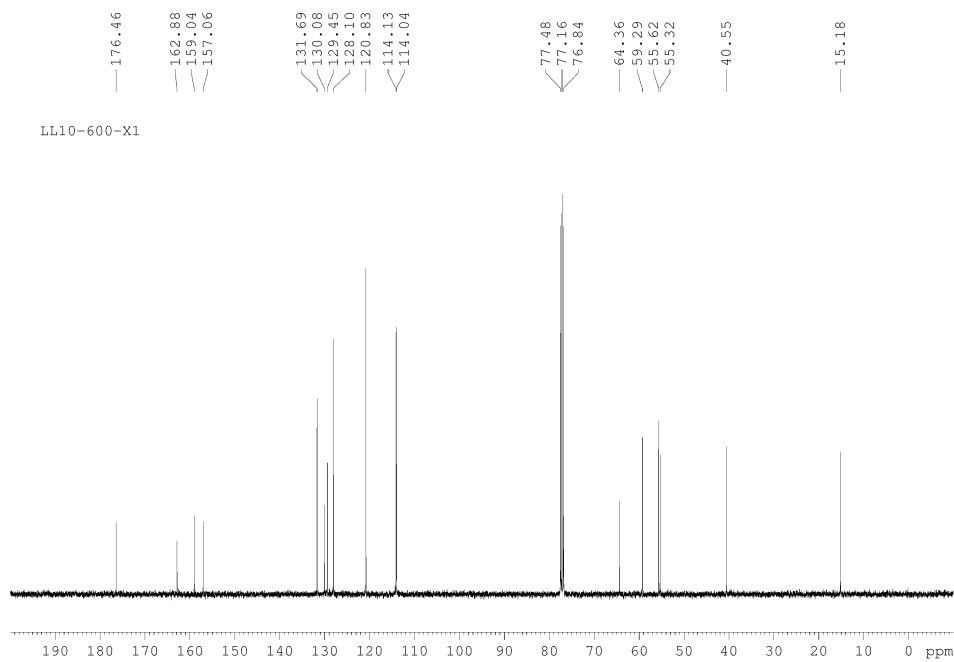



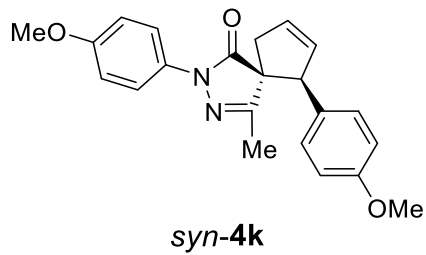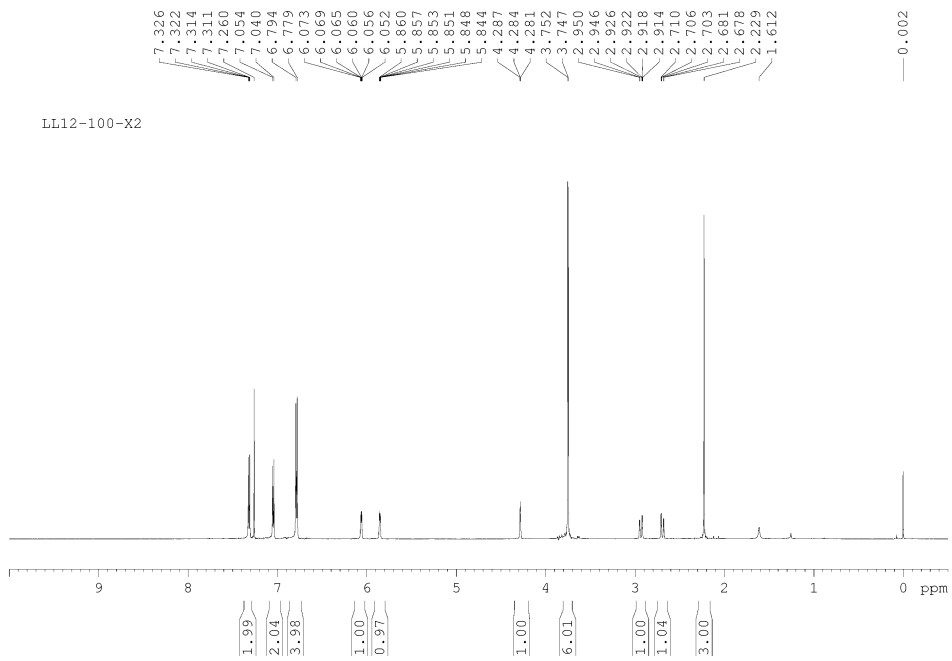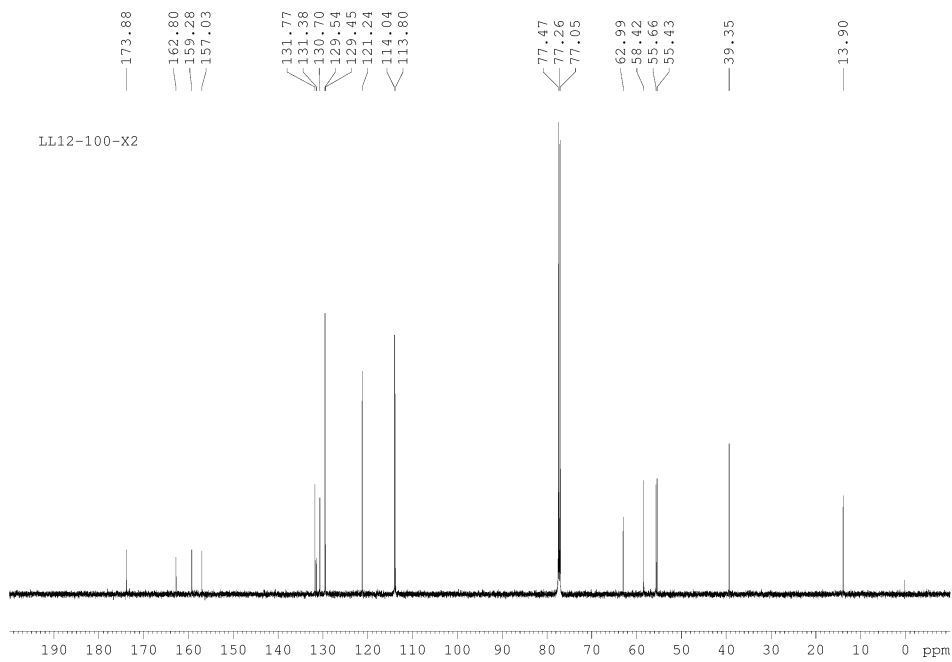

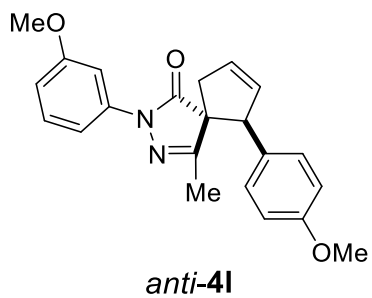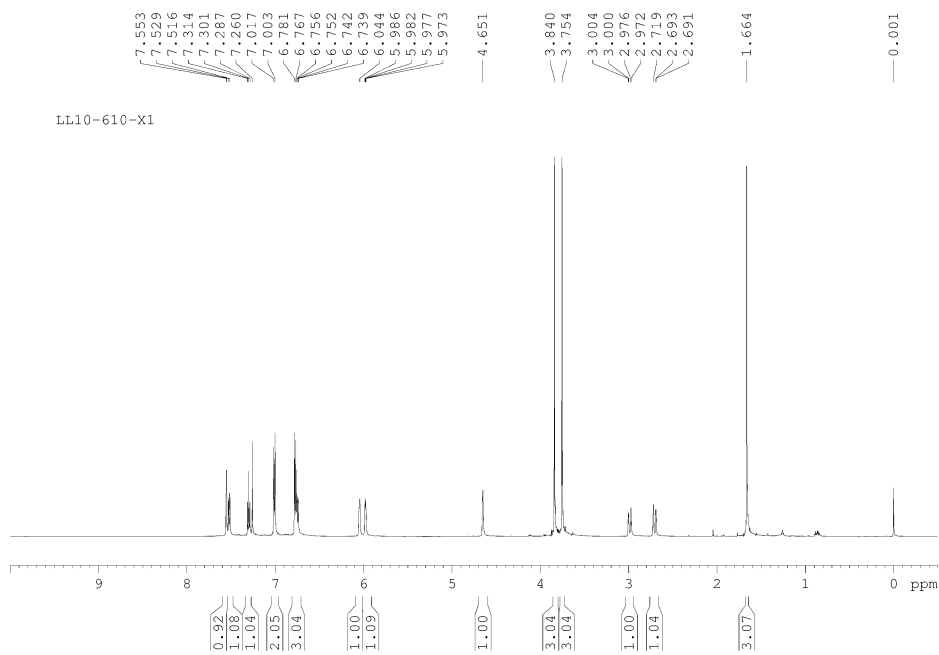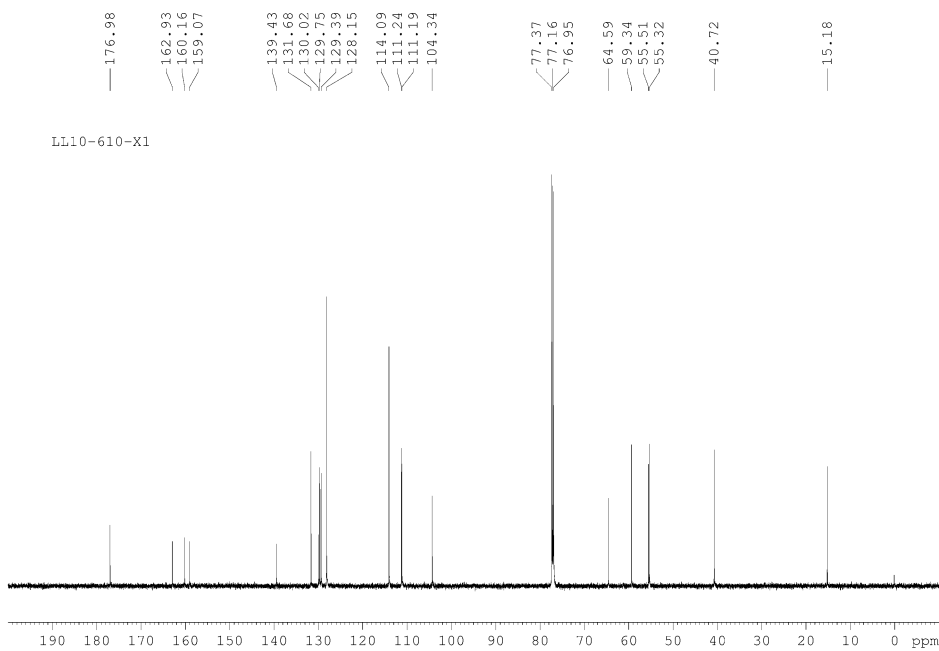

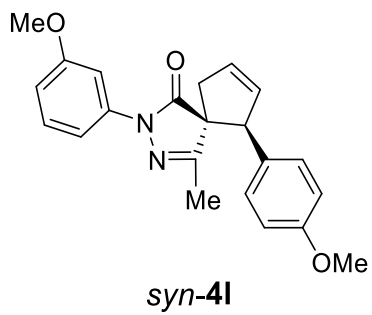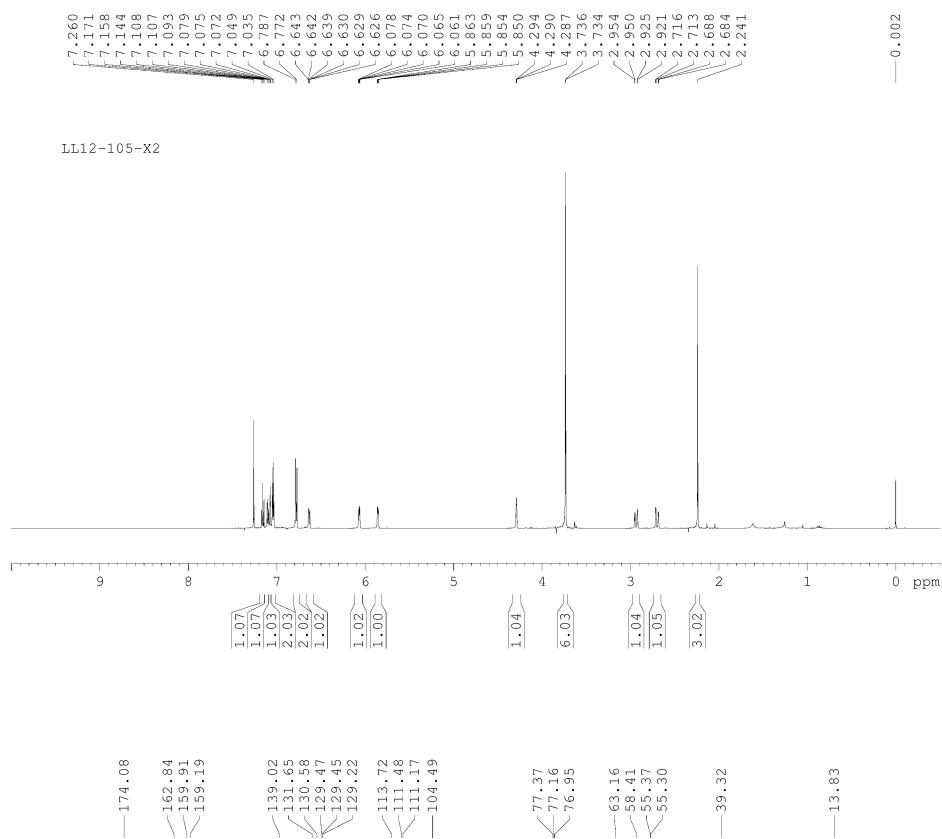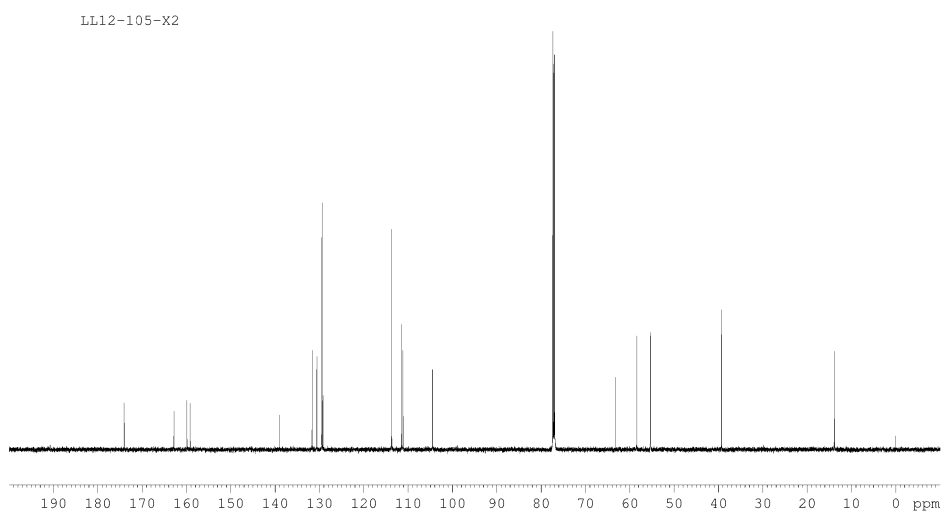

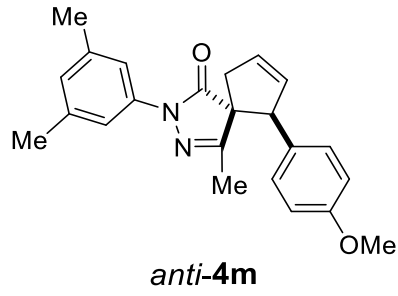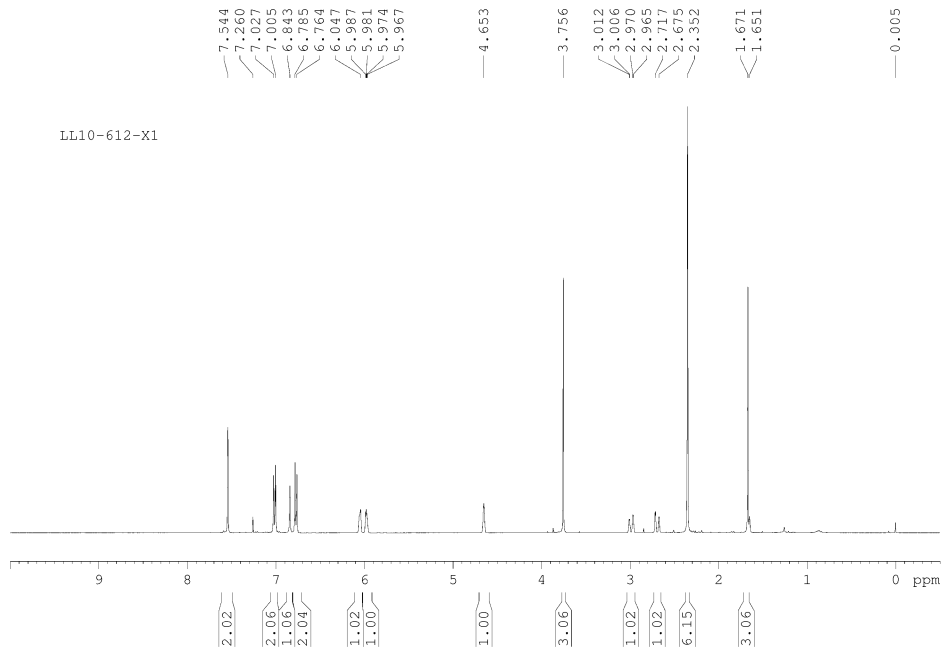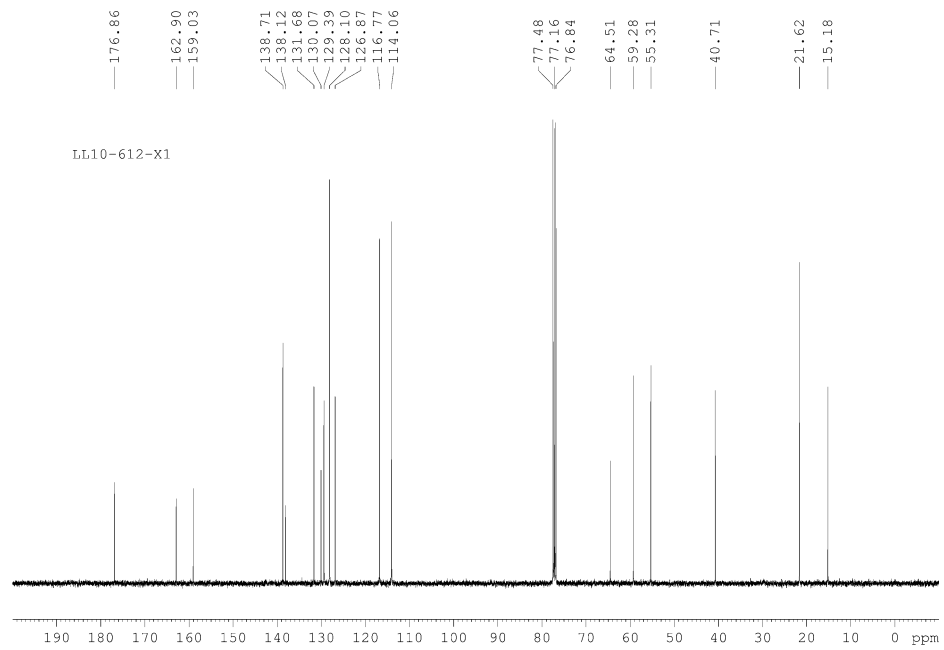

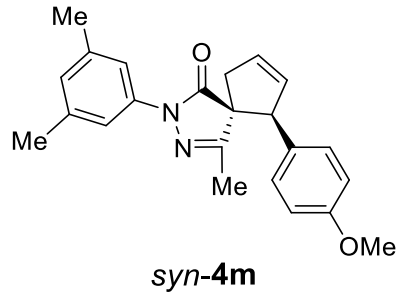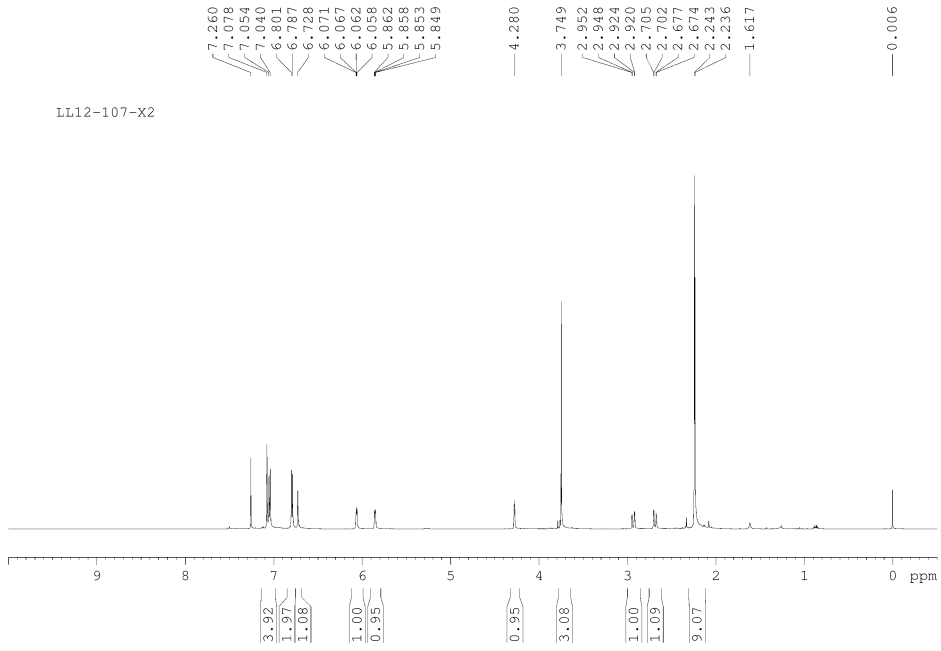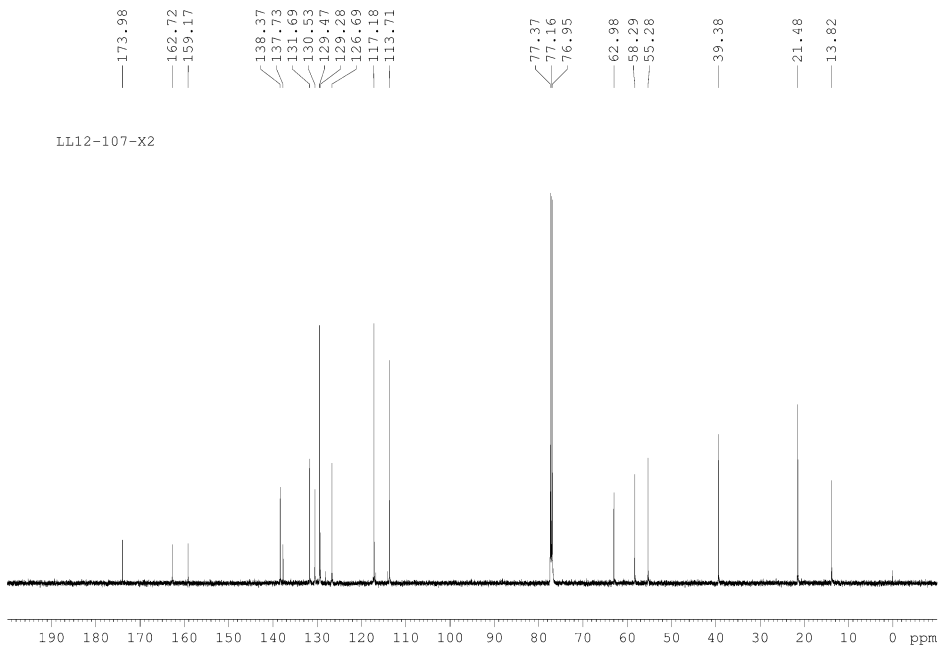

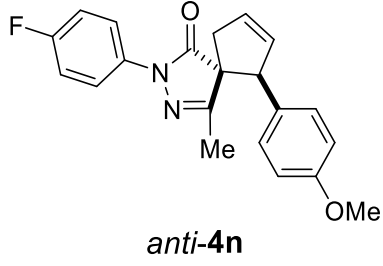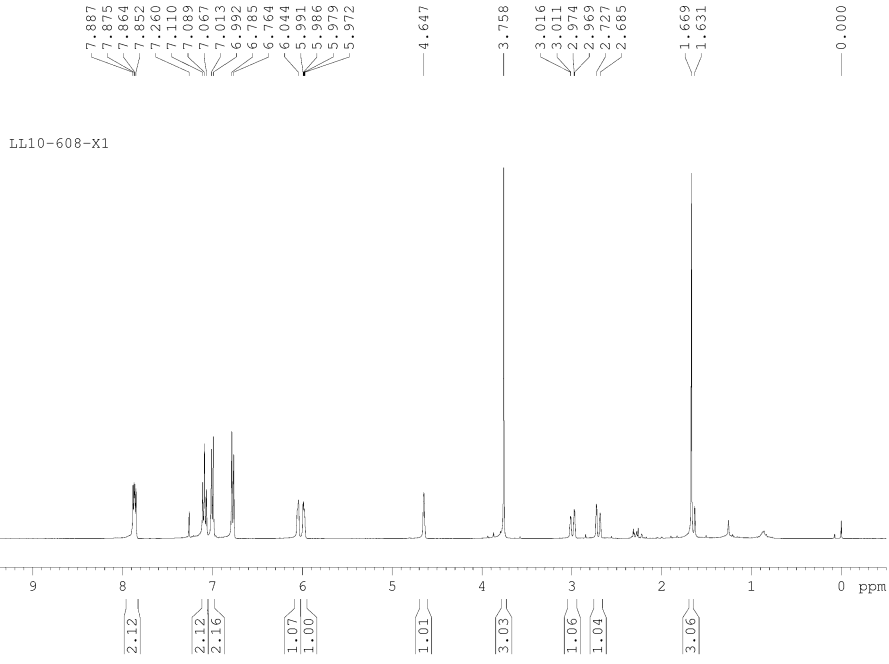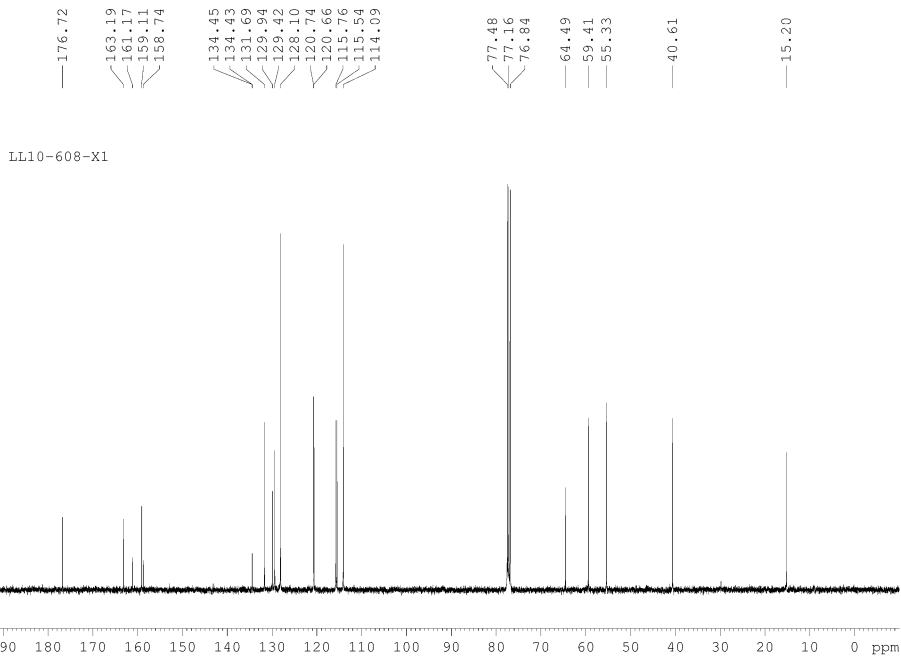

LL10-608-X1

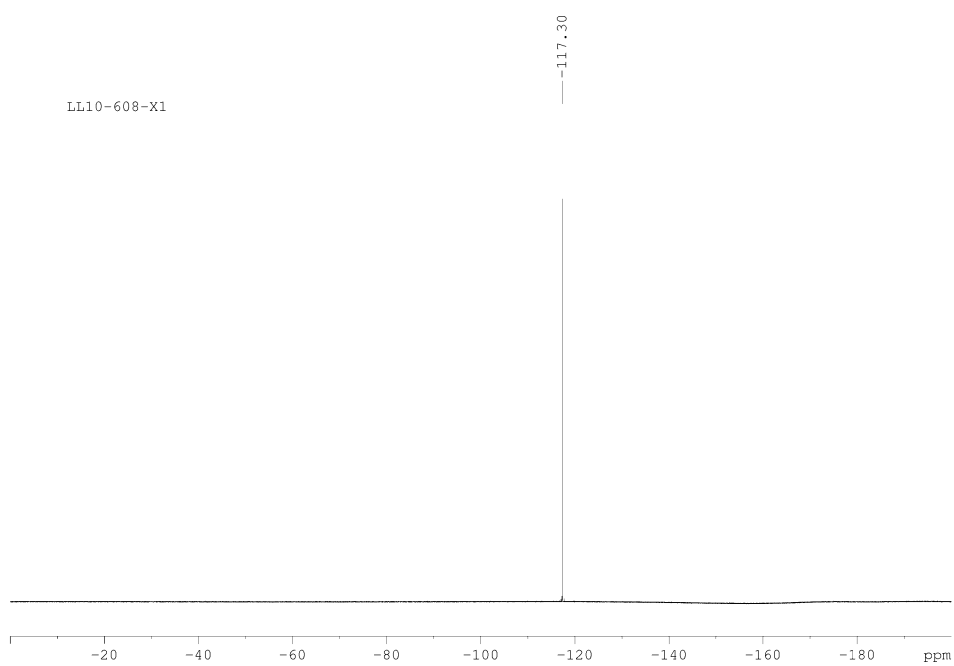

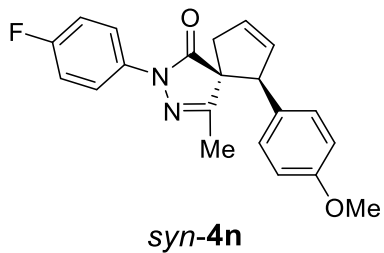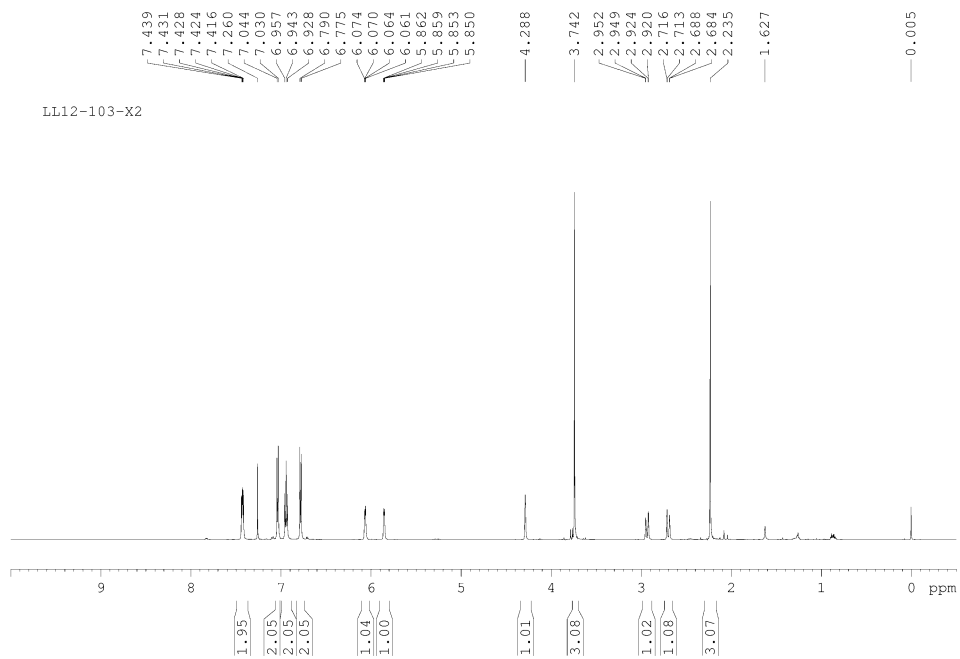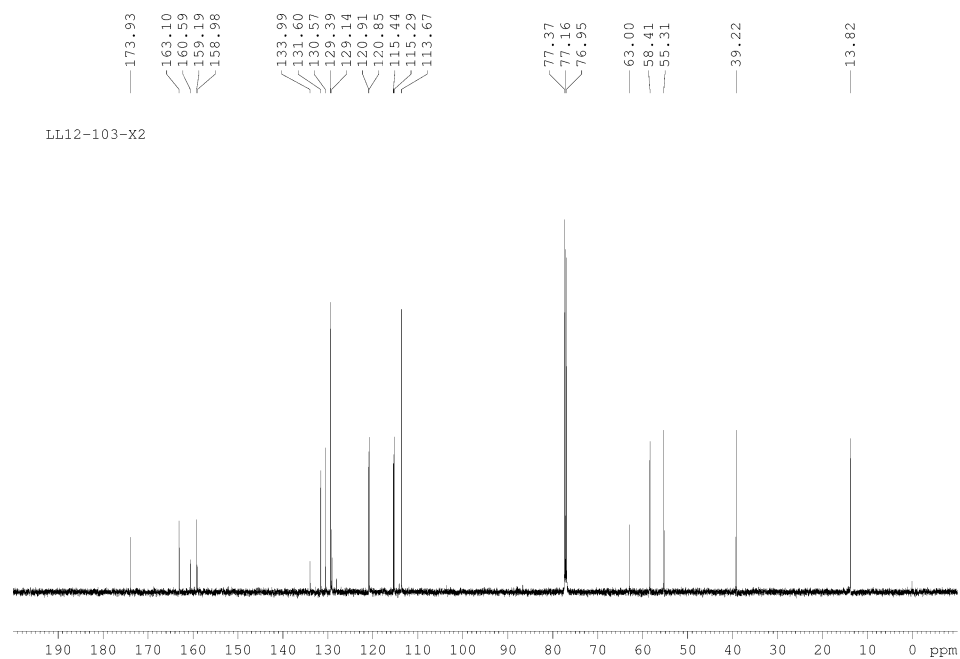



LL12-103-X2

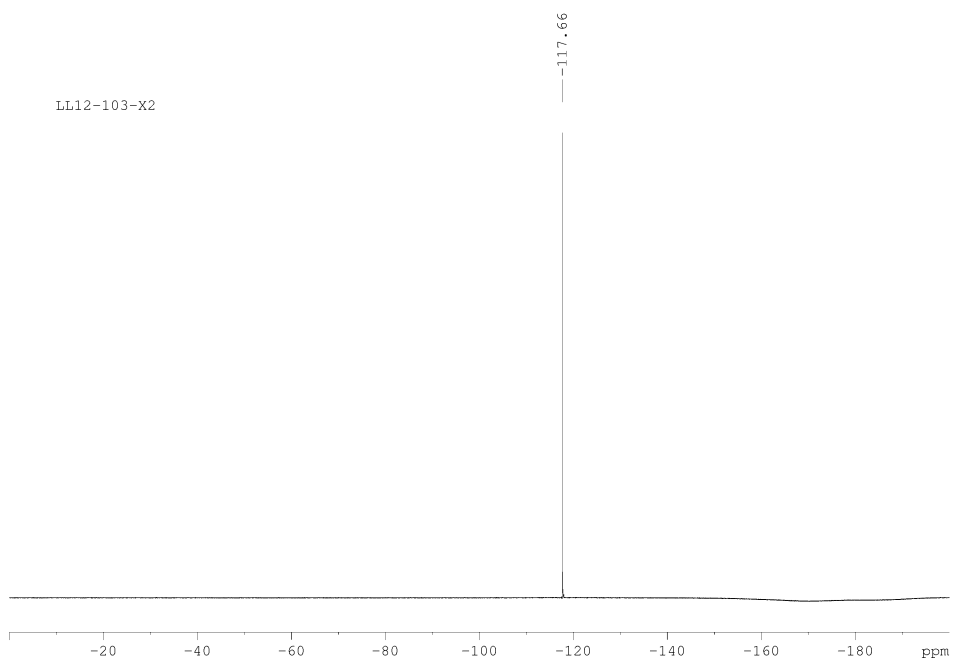

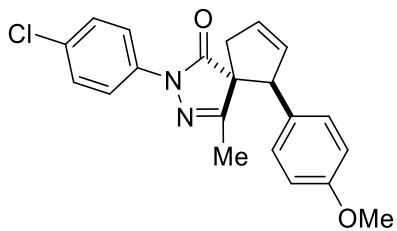

*anti-4o*

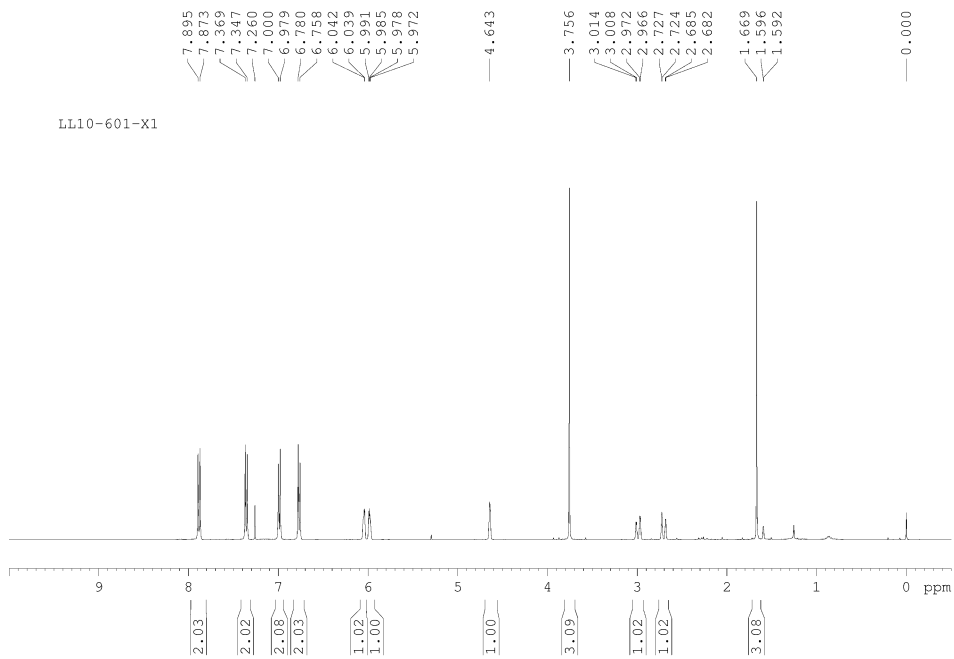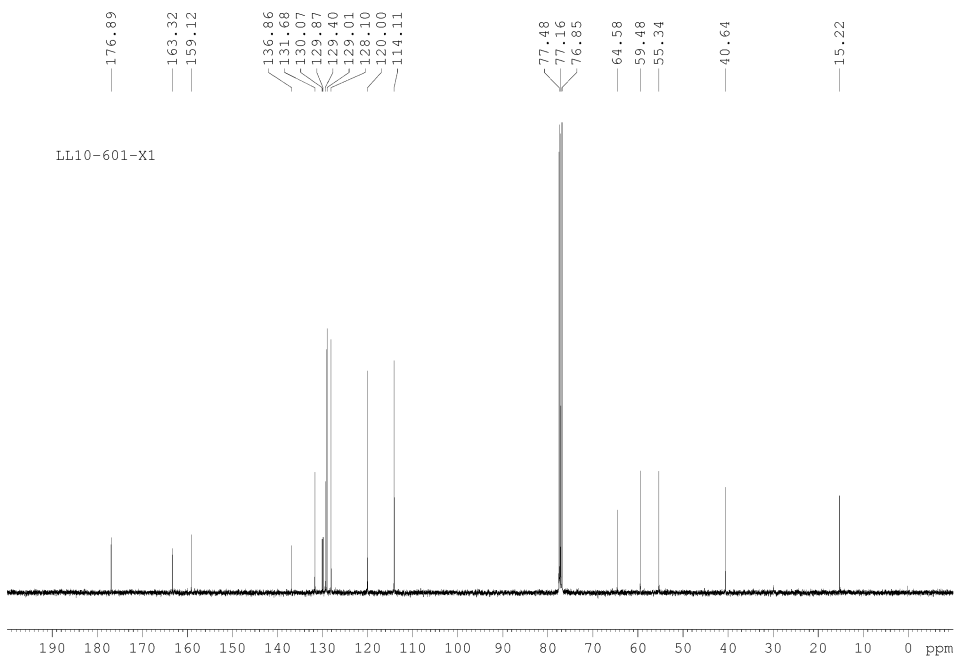

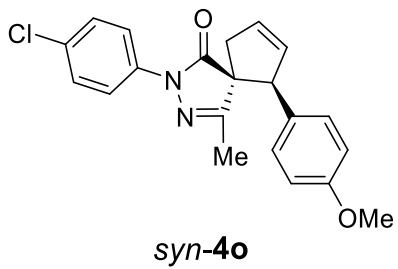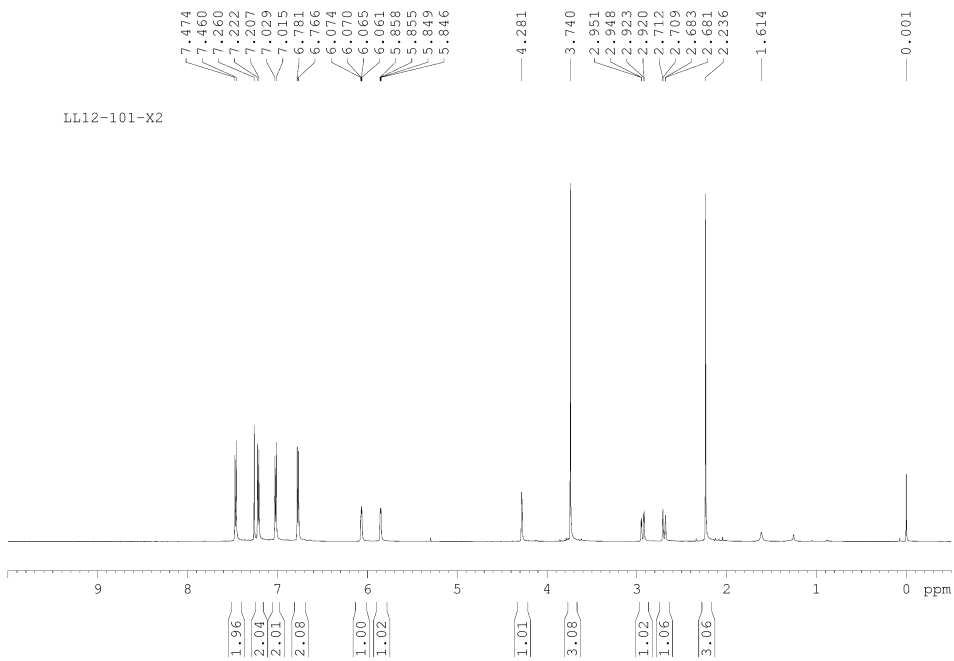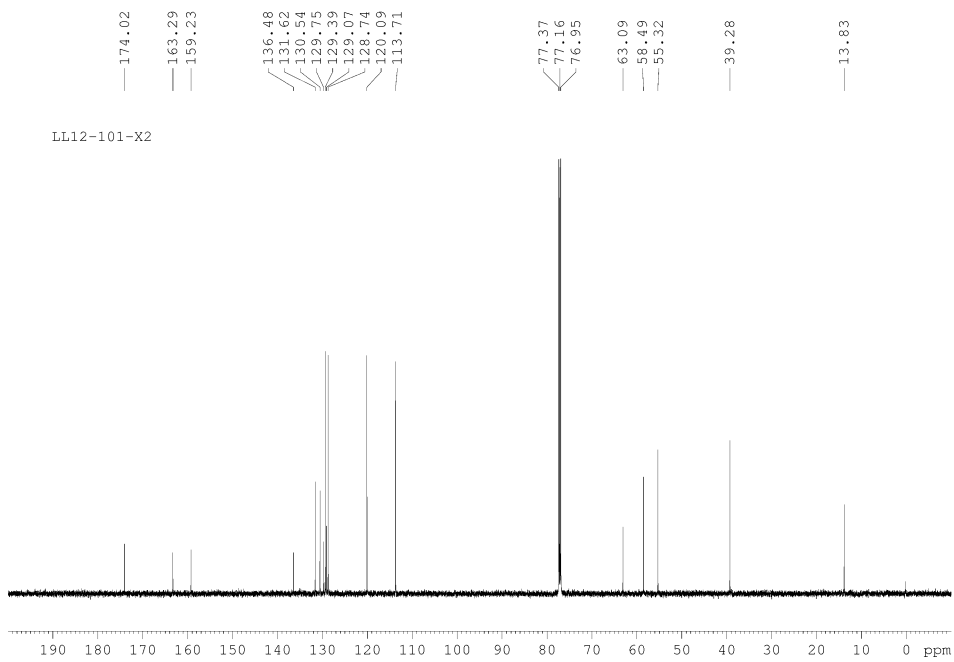

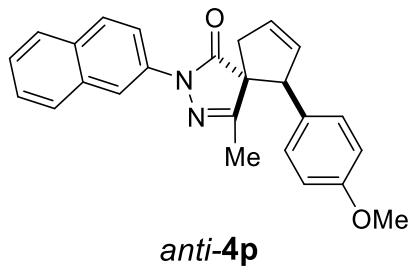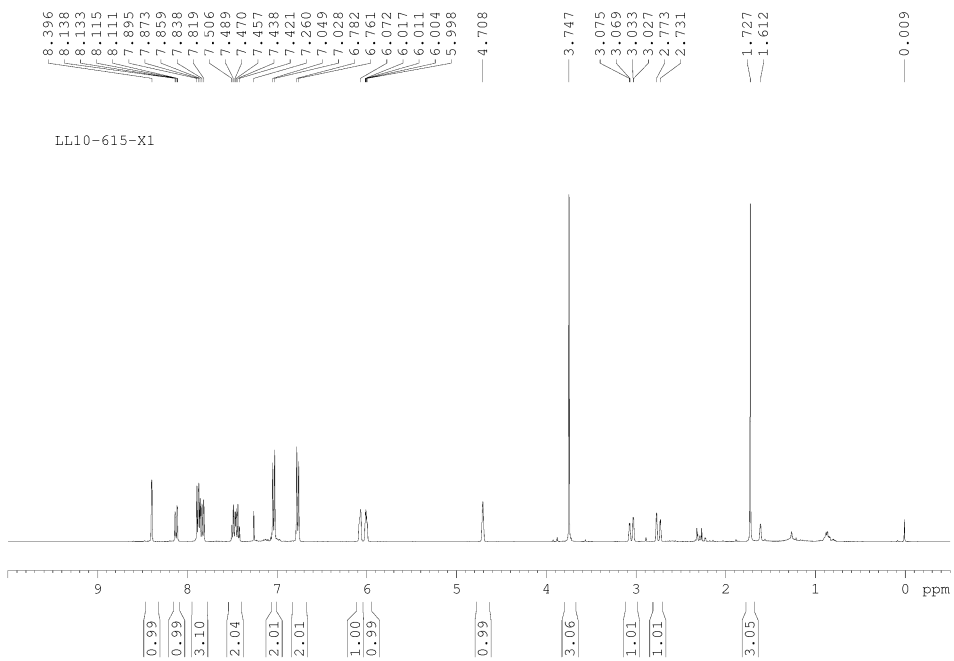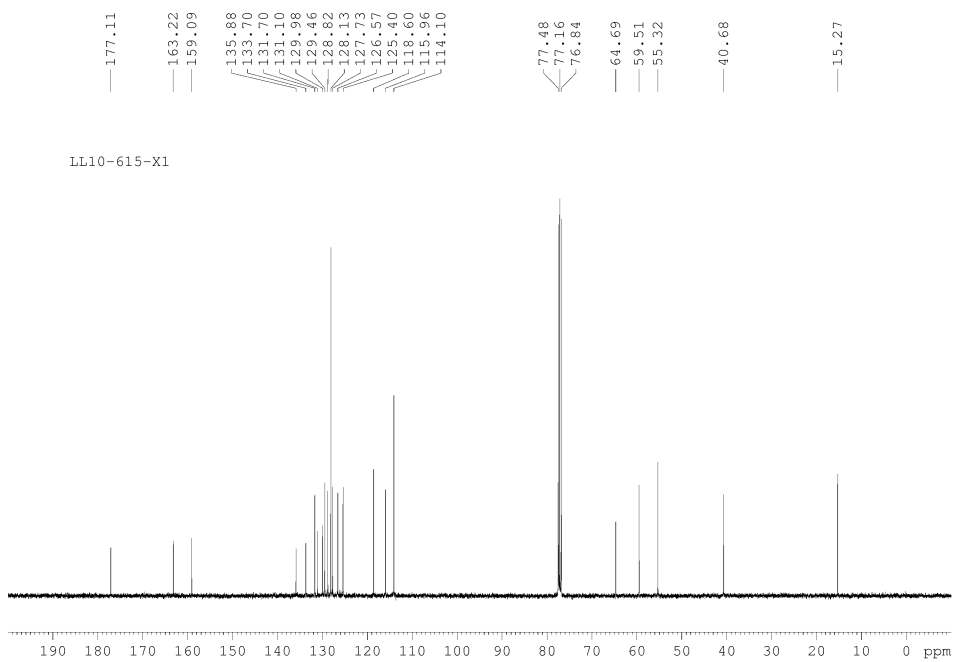

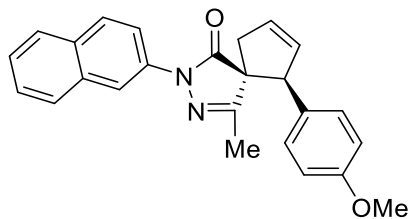

**syn-4p**

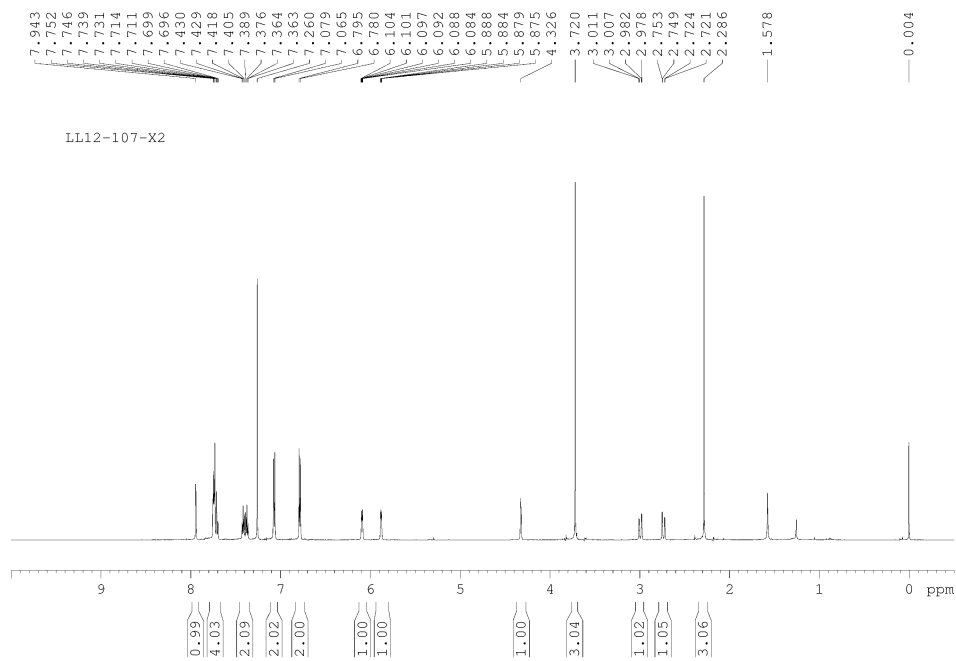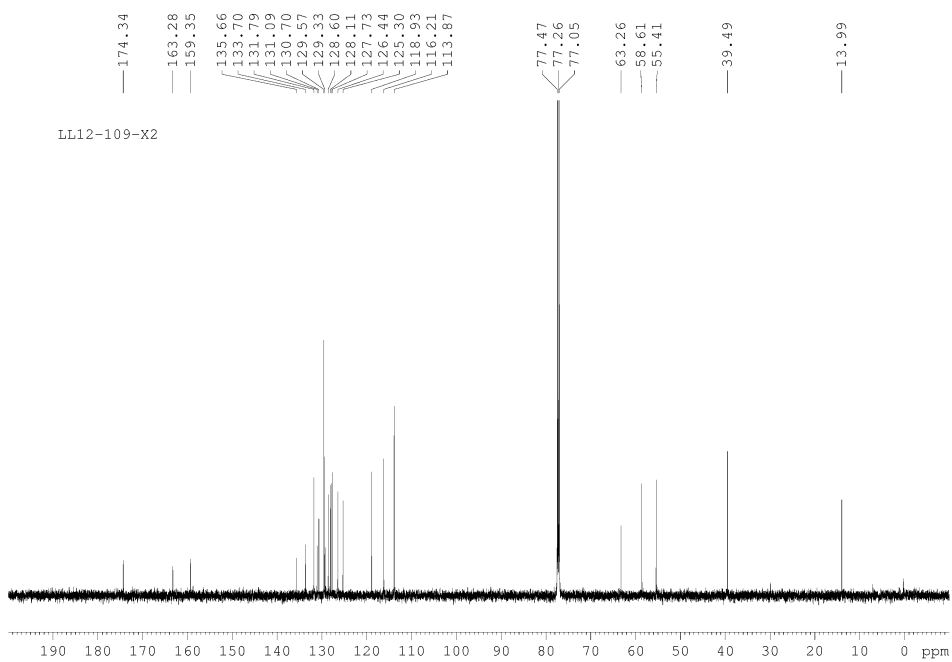

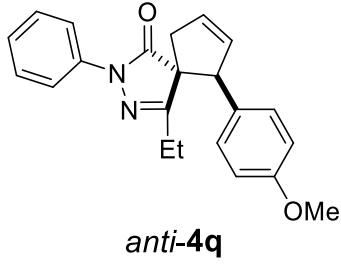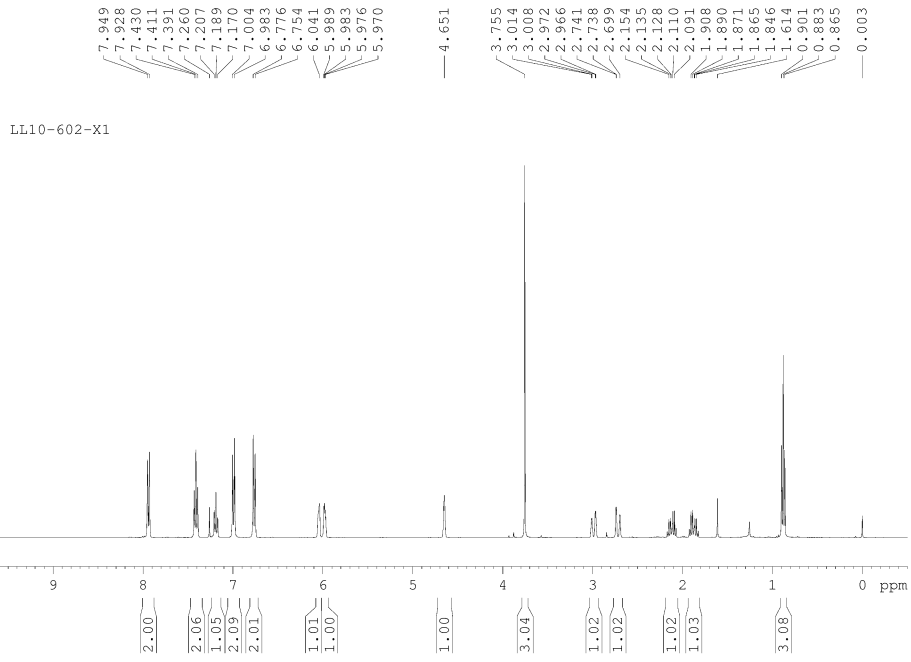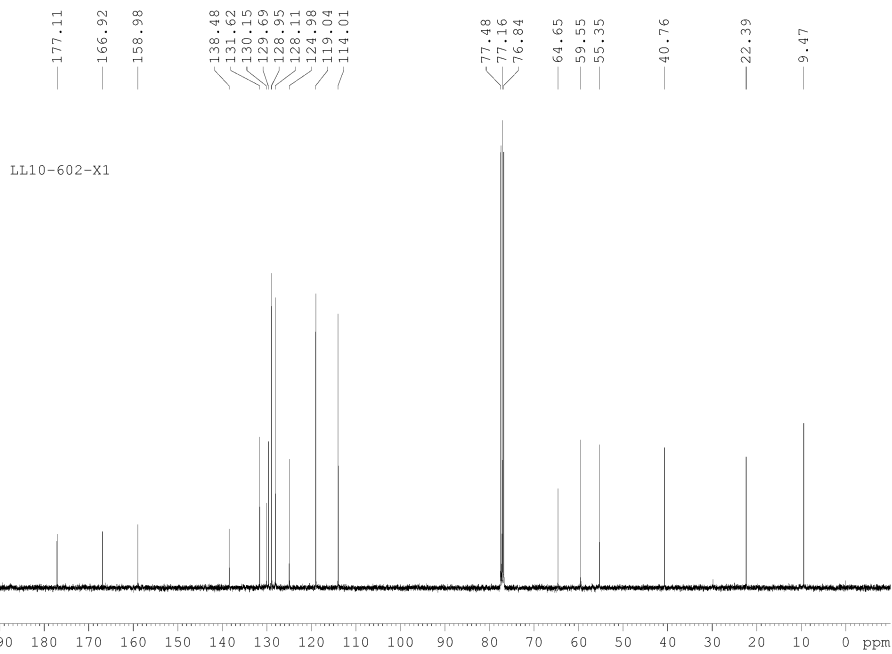

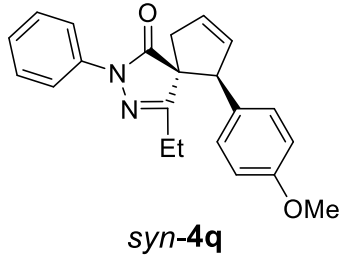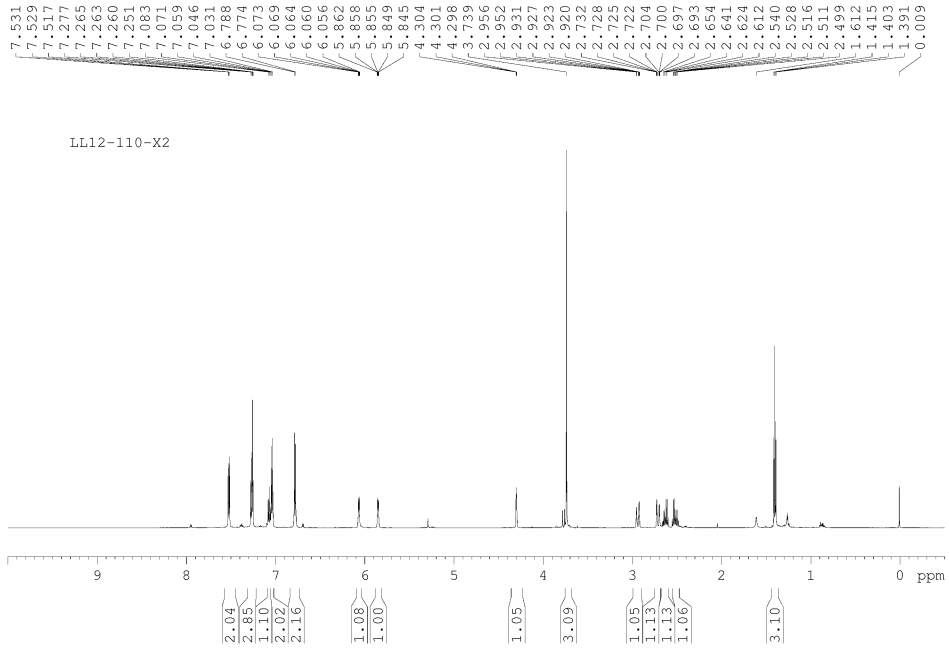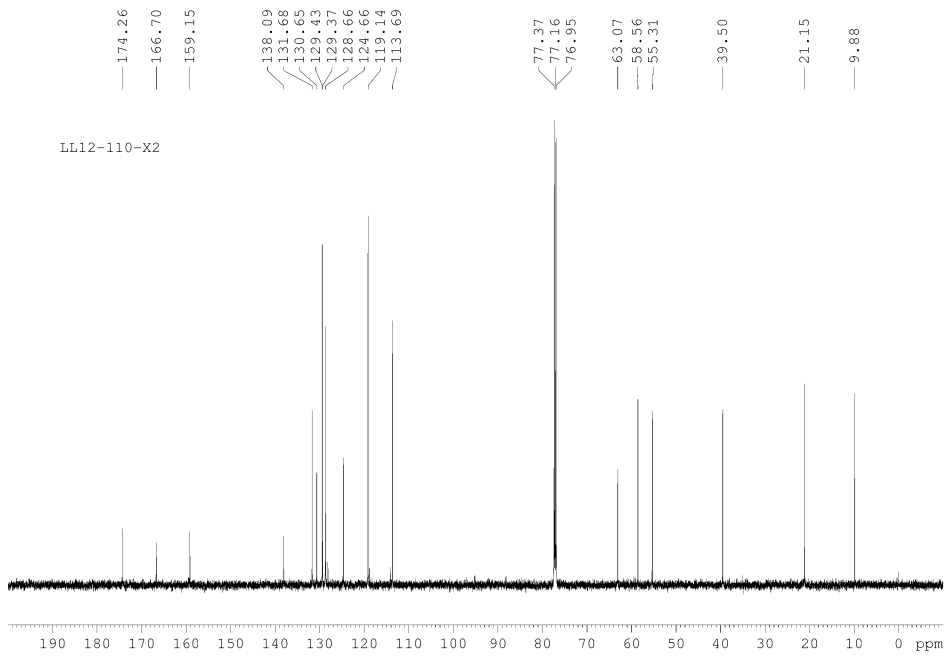

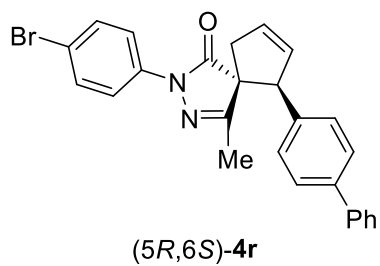

7.563  
7.548  
7.538  
7.545  
7.529  
7.515  
7.494  
7.480  
7.433  
7.420  
7.407  
7.391  
7.347  
7.334  
7.322  
7.260  
7.152  
7.139  
6.125  
6.118  
6.039  
6.034  
6.030  
6.026  
4.740  
3.054  
3.050  
3.026  
3.022  
2.757  
2.734  
2.729  
2.726  
1.708  
1.692  
1.605  
1.601  
0.006

LL12-179-X1

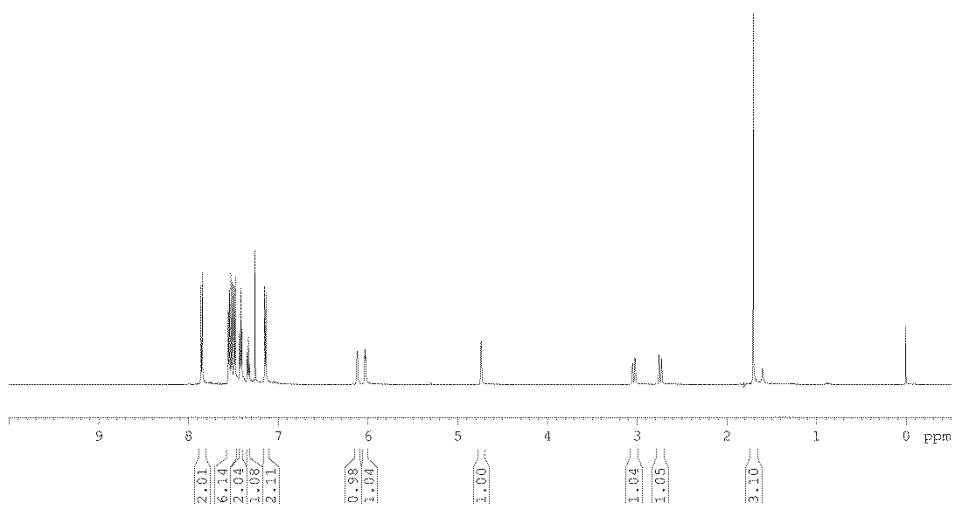

176.79  
163.14  
140.59  
140.46  
137.32  
136.96  
132.00  
131.32  
129.73  
128.93  
127.57  
127.47  
127.38  
127.07  
120.35  
117.91  
77.37  
77.16  
76.95  
64.60  
59.67  
40.62  
15.26

LL12-179-X1

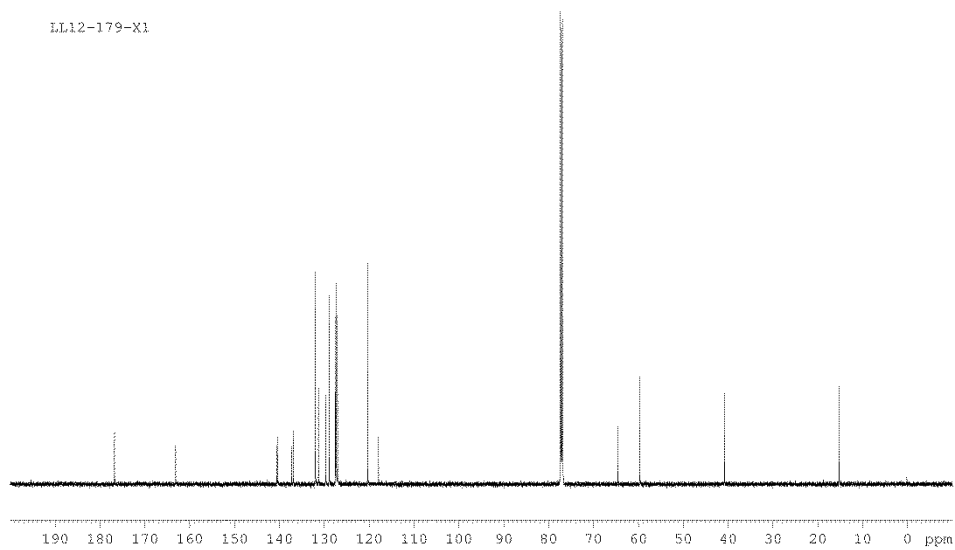



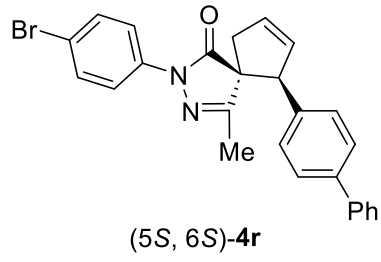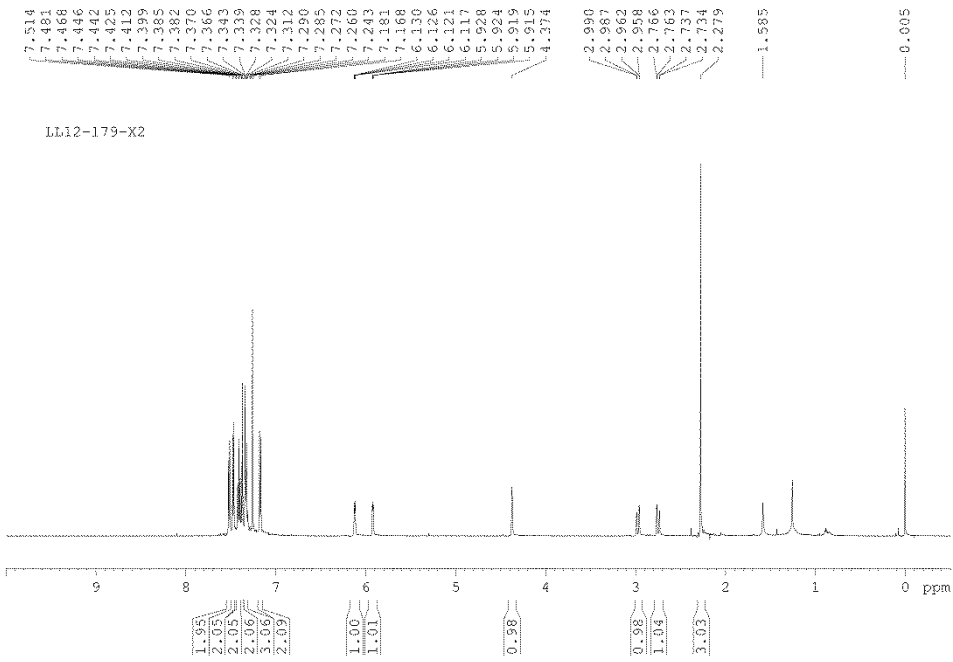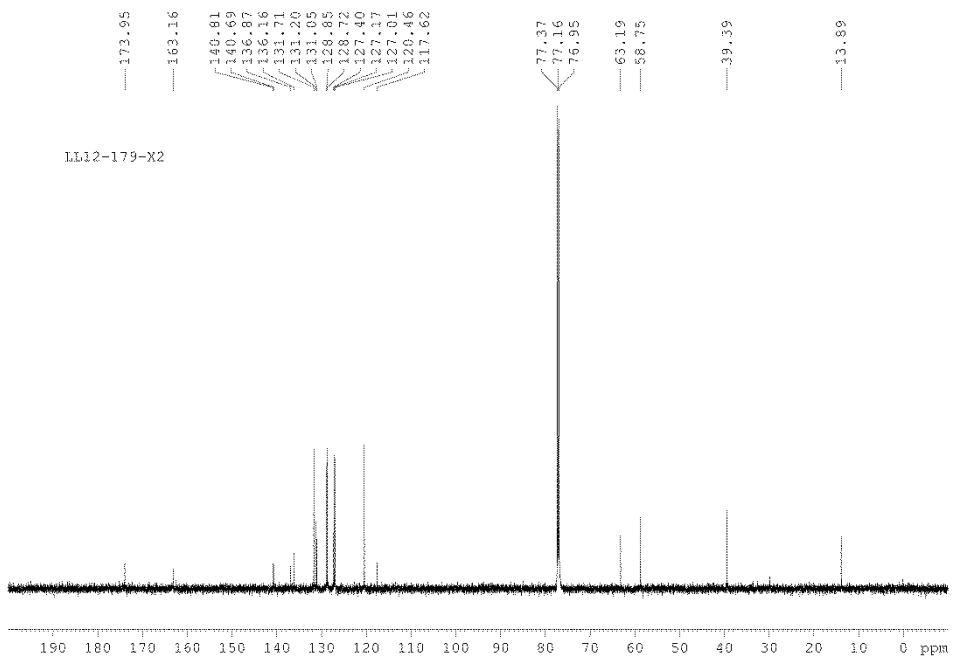

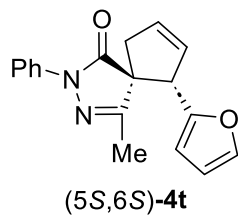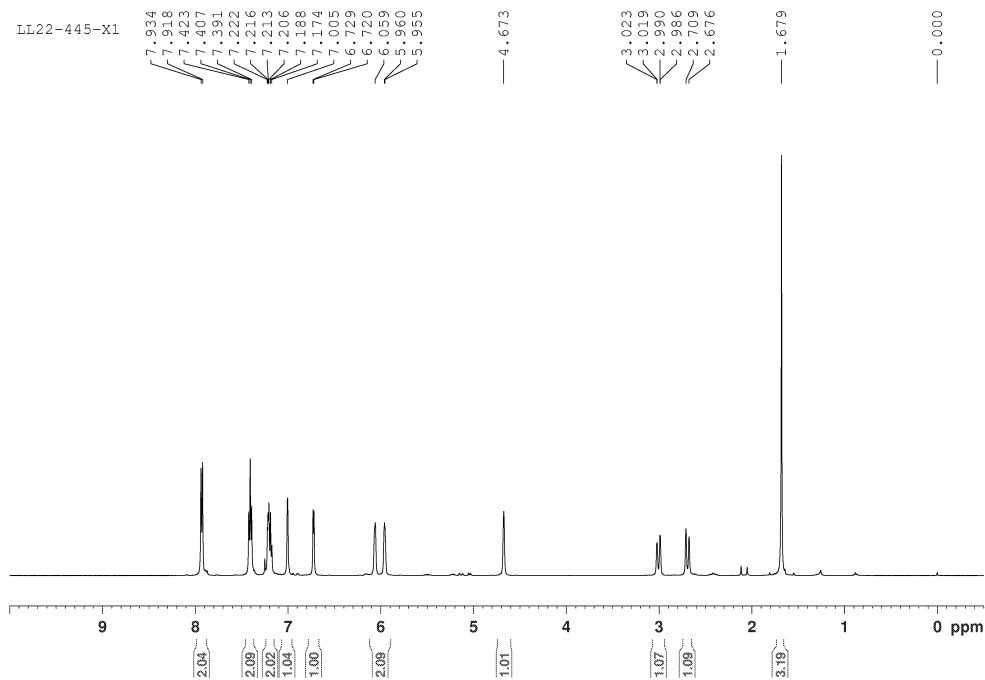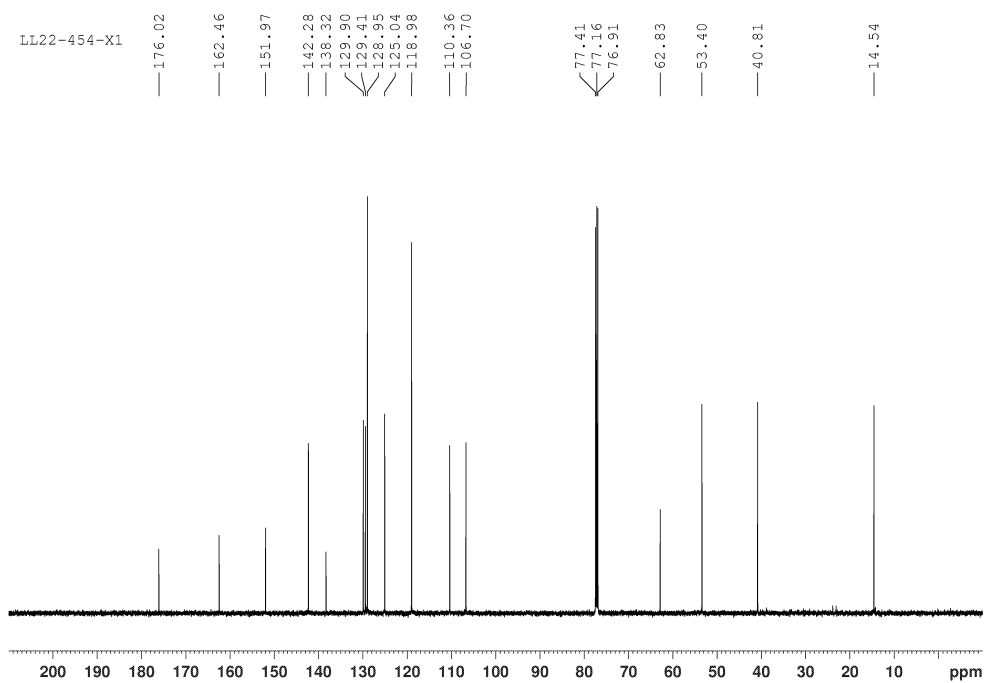

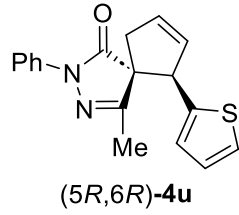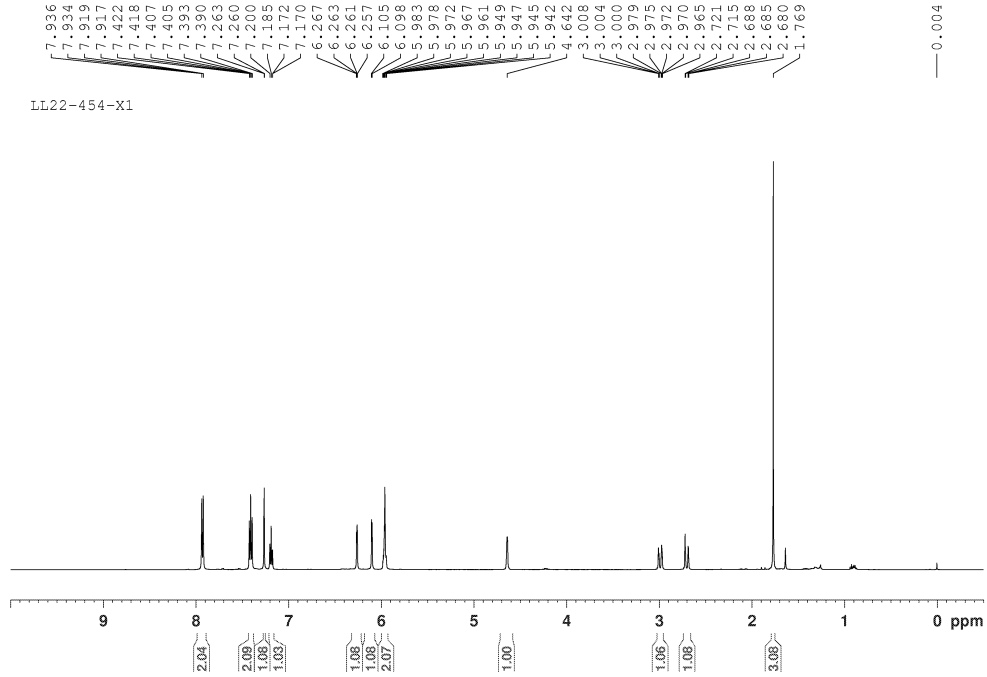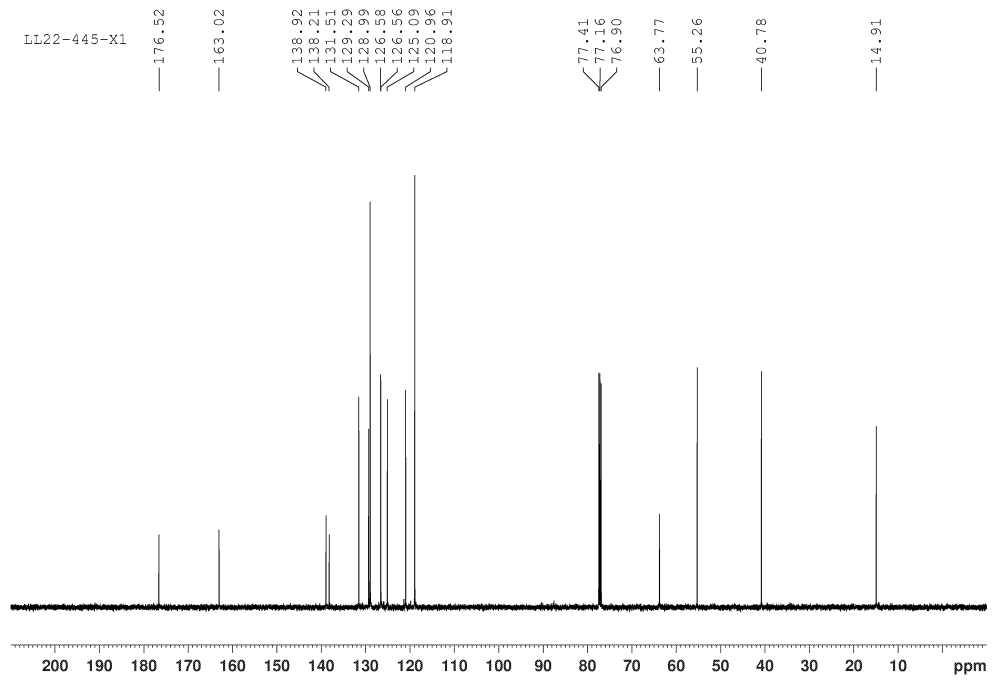

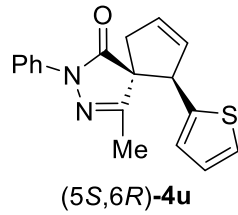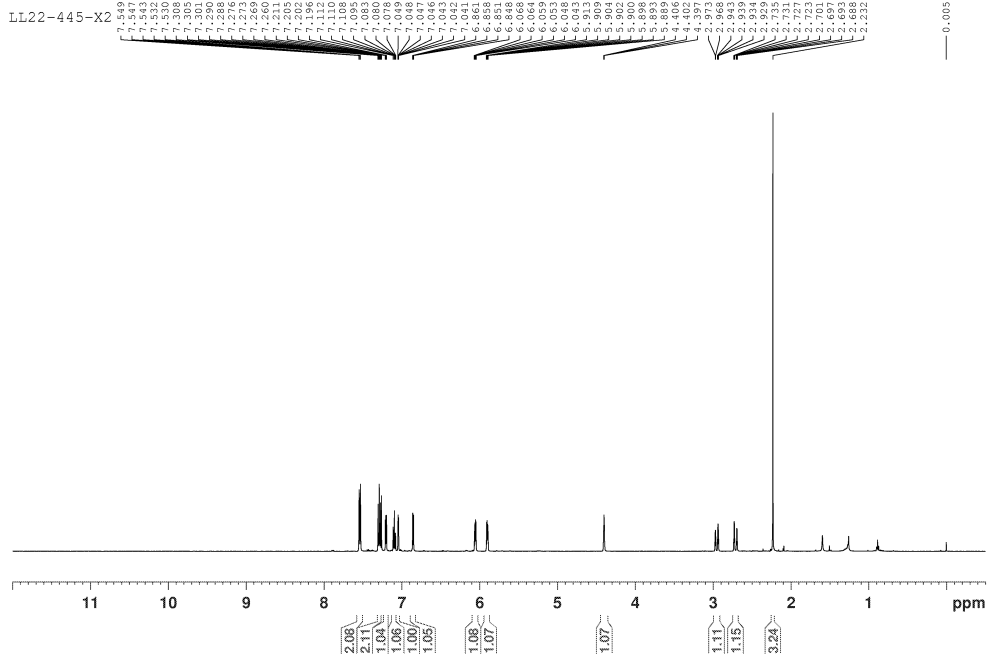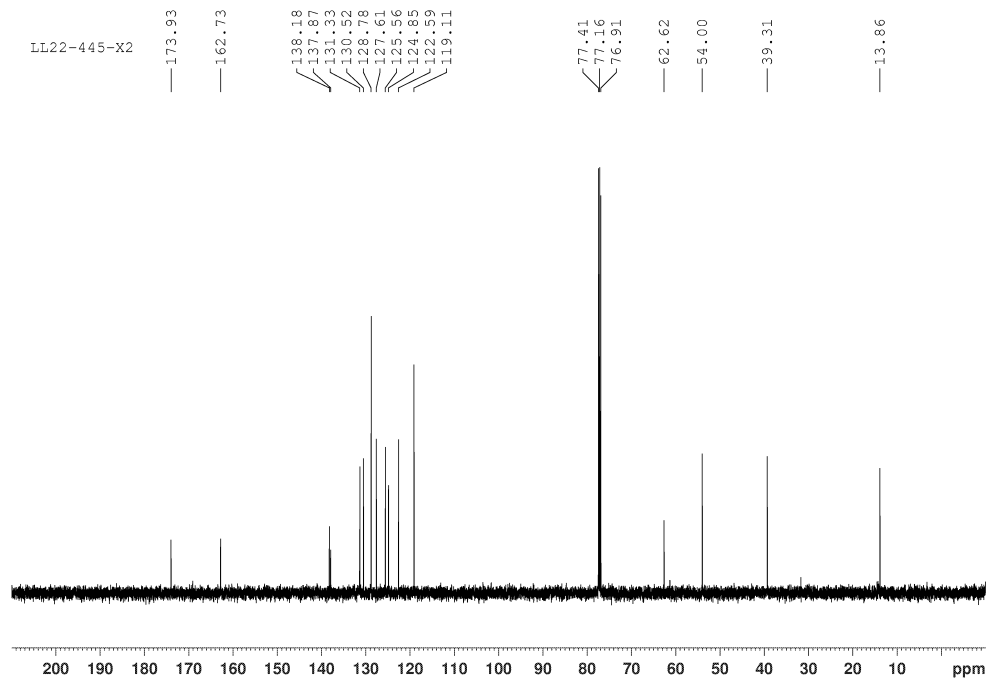

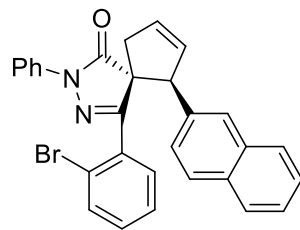

(5R,6S)-4s

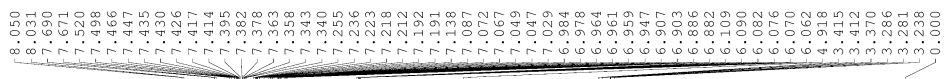

LL12-241-X1

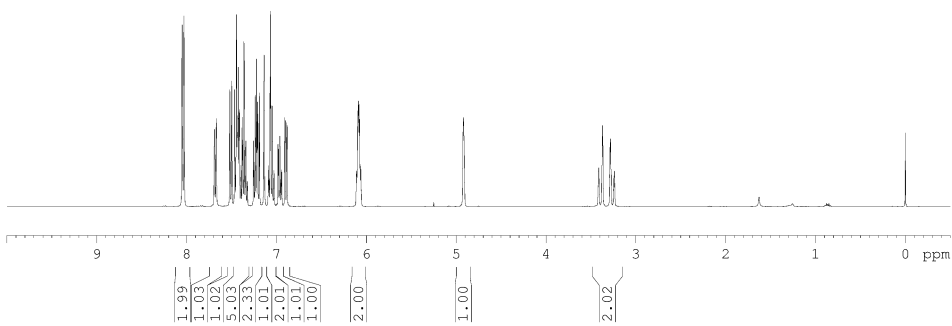

LL12-241-X1

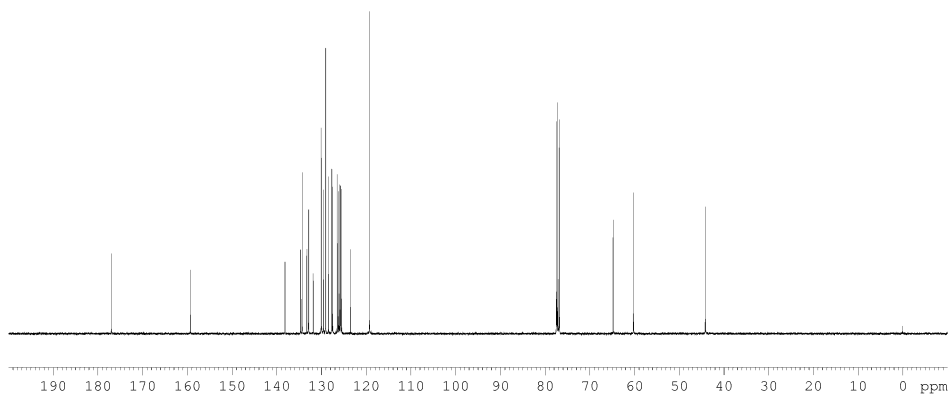

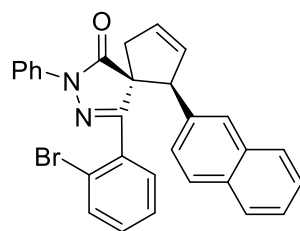

(5S,6S)-4s

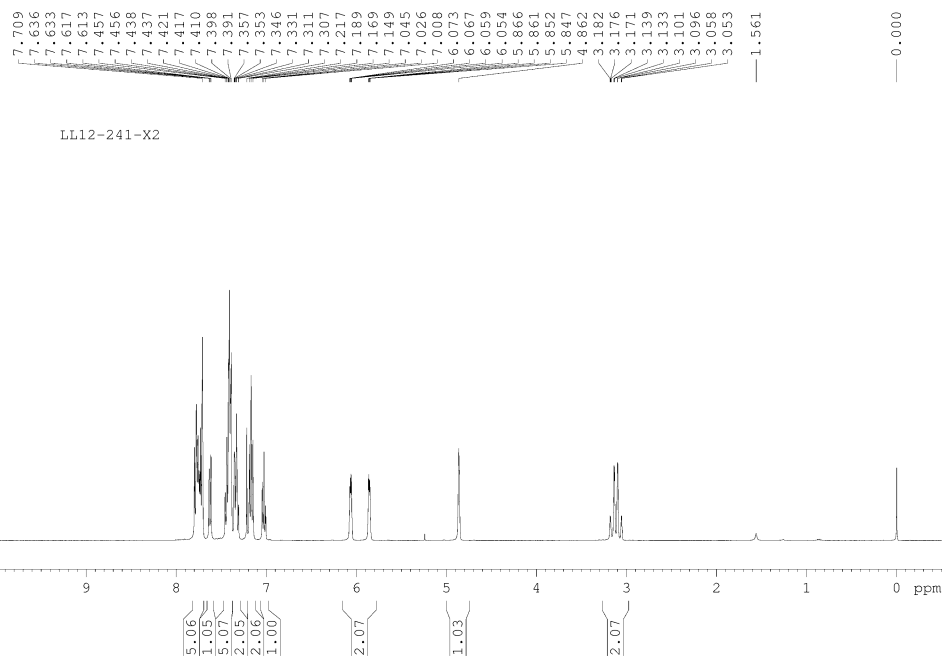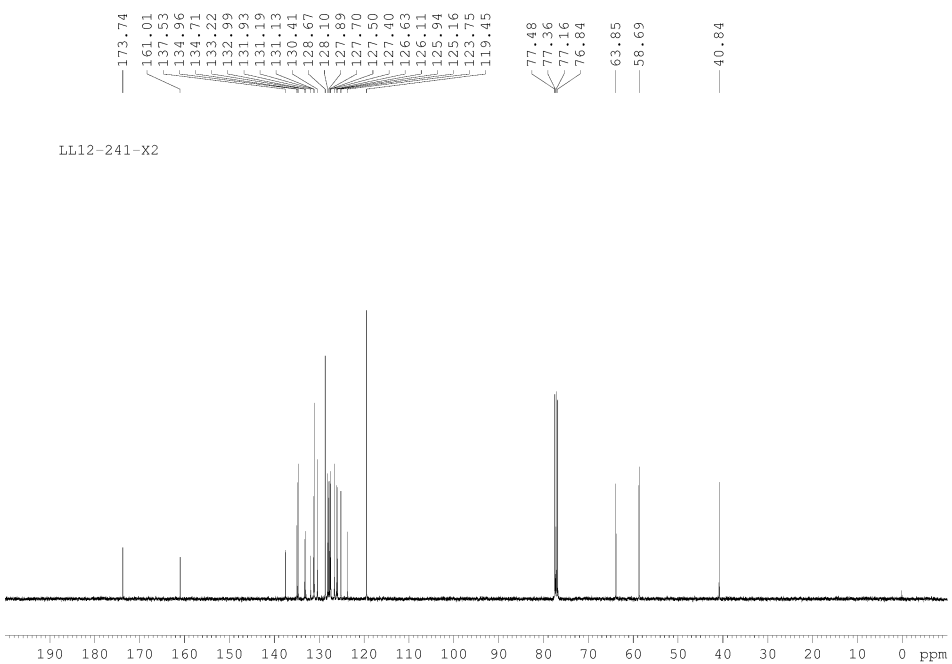

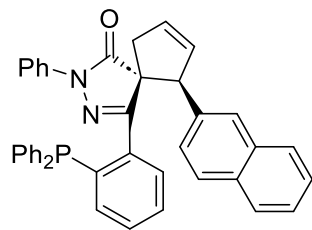

(5R,6S)-8

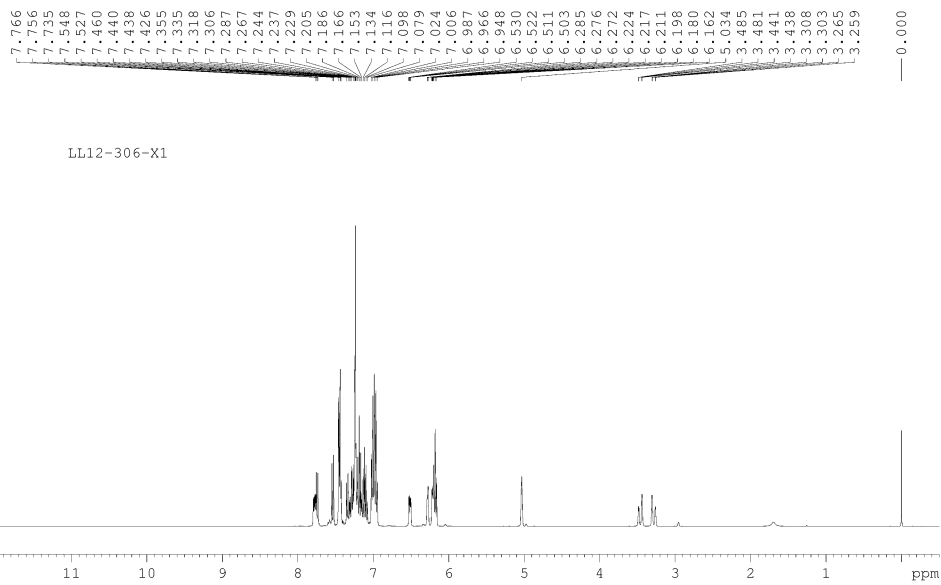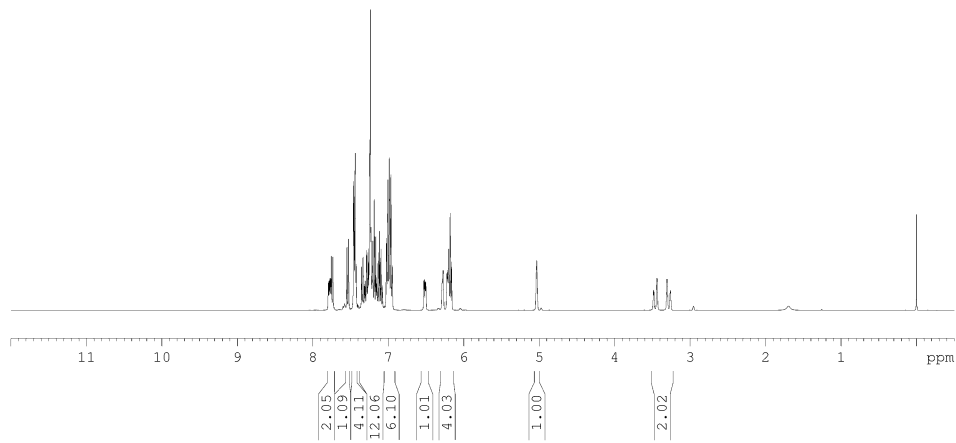

LL12-306-X1

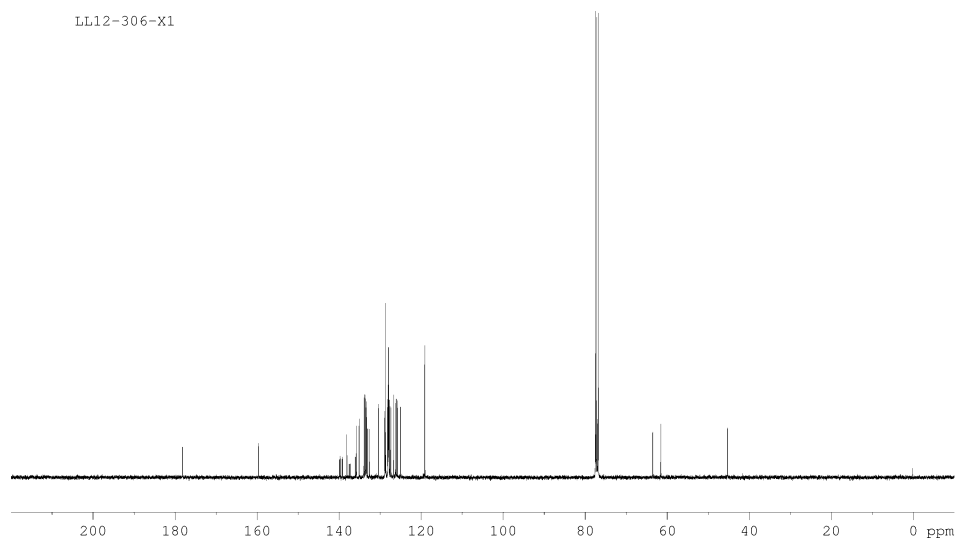

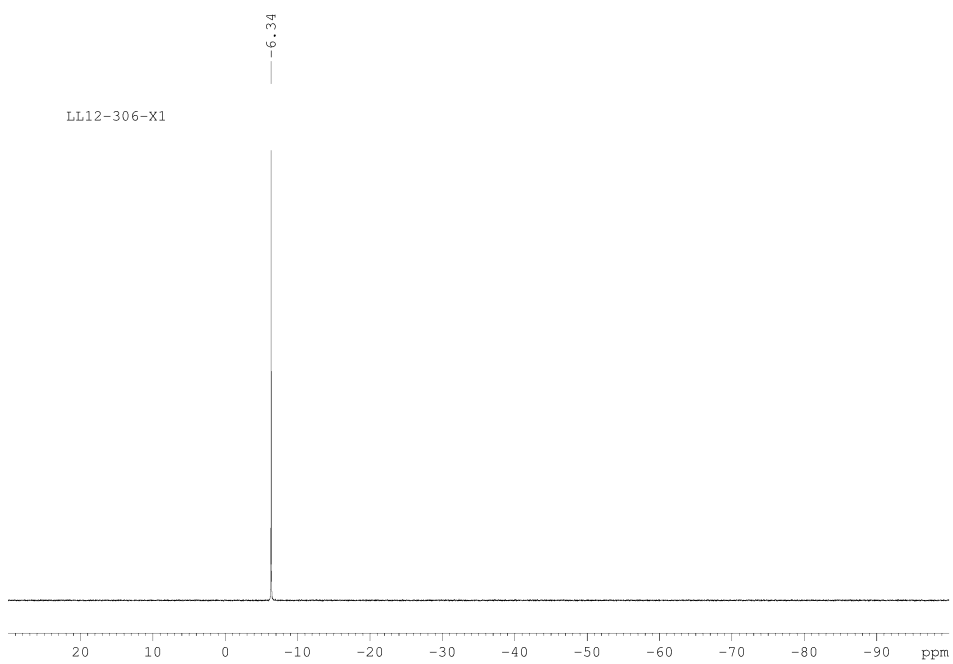



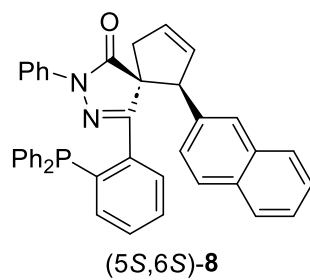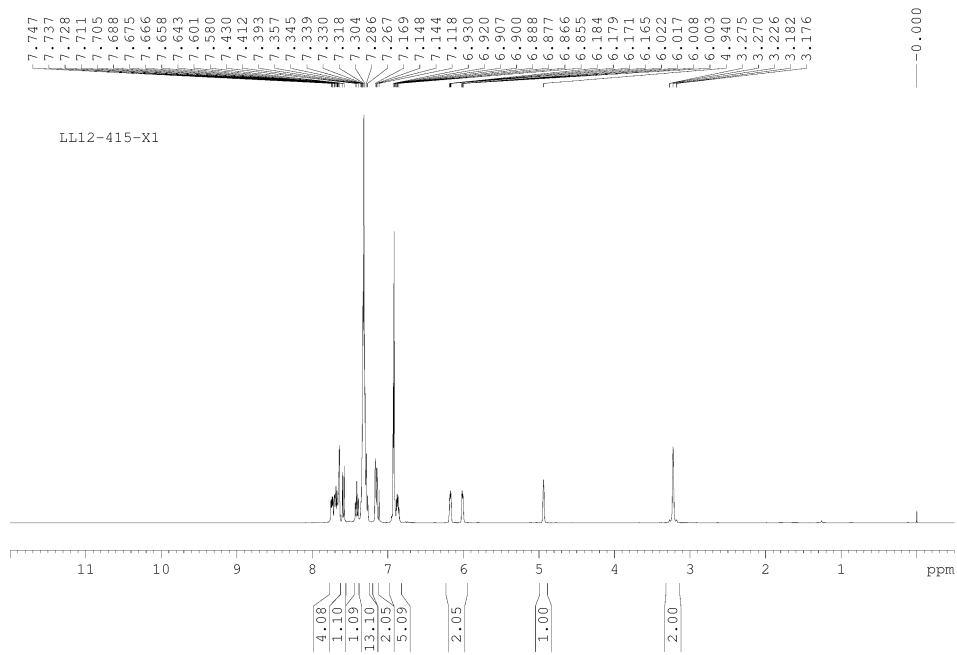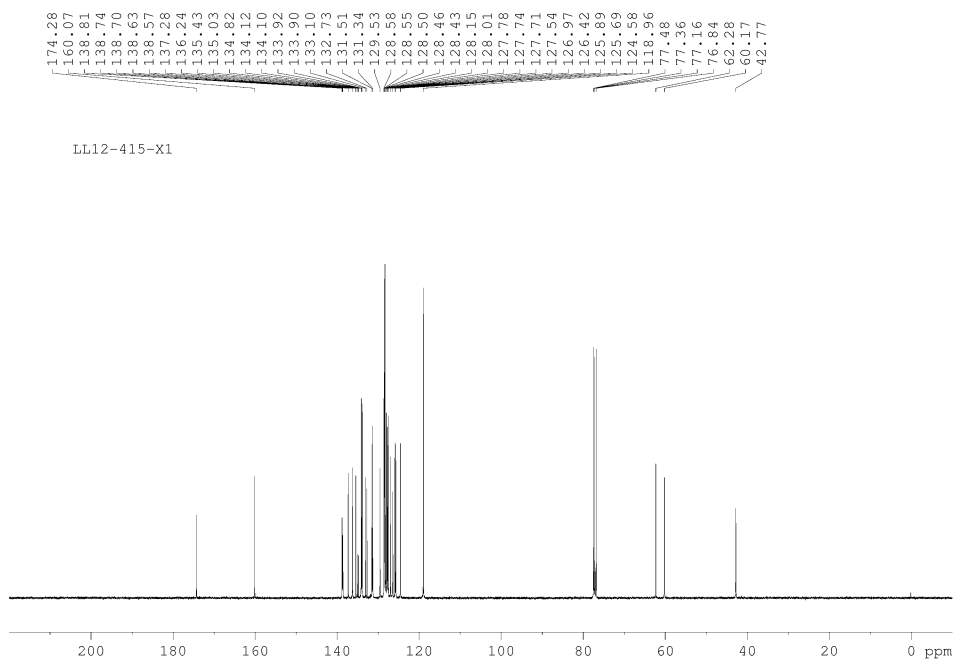

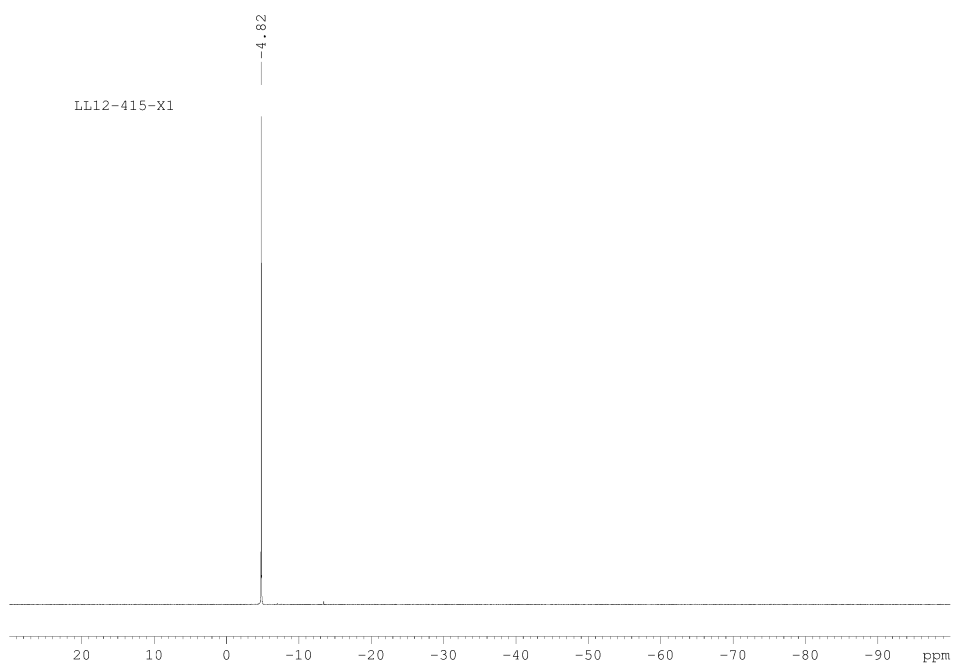

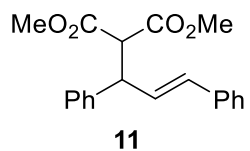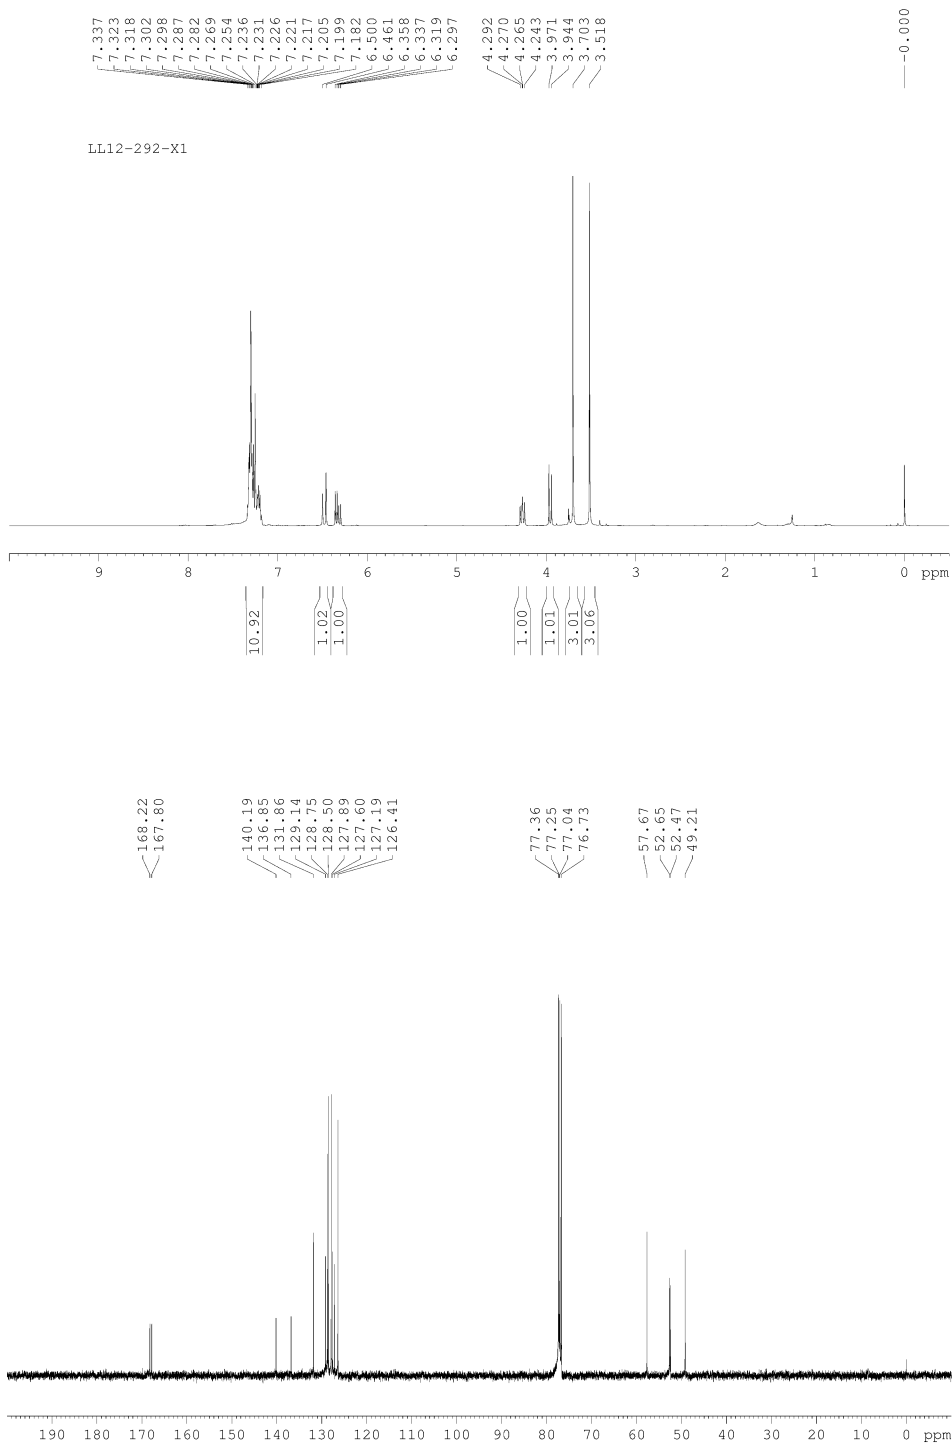

Supplement: d4qo00358f1.pdf [file d4qo00358f1.pdf]
